# Supplementary material for: Bicyclic Isoxazoline Derivatives: Synthesis and Evaluation of Biological Activity
Source: MDPI journal article supplement (doi:10.3390/molecules27113546), 2022-05-31

# Bicyclic isoxazoline derivatives: synthesis and evaluation of biological activity

Kseniya N. Sedenkova <sup>1</sup>, Kristian S. Andriasov <sup>1</sup>, Marina G. Eremenko <sup>1</sup>, Yuri K. Grishin <sup>1</sup>, Vera A. Alferova<sup>2,3</sup>, Anna A. Baranova<sup>2,3</sup>, Nikolay A. Zefirov <sup>1</sup>, Olga N. Zefirova <sup>1</sup>, Vladimir V. Zarubaev <sup>4</sup>, Yulia A. Gracheva <sup>1</sup>, Elena R. Milaeva <sup>1</sup> and Elena B. Averina <sup>1,\*</sup>

<sup>1</sup> Department of Chemistry, Lomonosov Moscow State University, Leninskie Gory 1-3, Moscow, Russia; elaver@med.chem.msu.ru

<sup>2</sup> Gause Institute of New Antibiotics, B. Pirogovskaya 11, 119021 Moscow, Russia; alferovava@gmail.com (V.A.A.); anjabaranowa@list.ru (A.A.B.)

<sup>3</sup> Shemyakin-Ovchinnikov Institute of Bioorganic Chemistry, Miklukho-Maklaya 16/10, 117997 Moscow, Russia

<sup>4</sup> Saint Petersburg Pasteur Research Institute of Epidemiology and Microbiology, 14 Mira St., Saint Petersburg 197101, Russia; zarubaev@gmail.com

\* Correspondence: elaver@med.chem.msu.ru

## Supporting information

Copies of NMR spectra.....2

$^1\text{H}$  NMR ( $\text{CDCl}_3$ ) spectrum of compound **1**

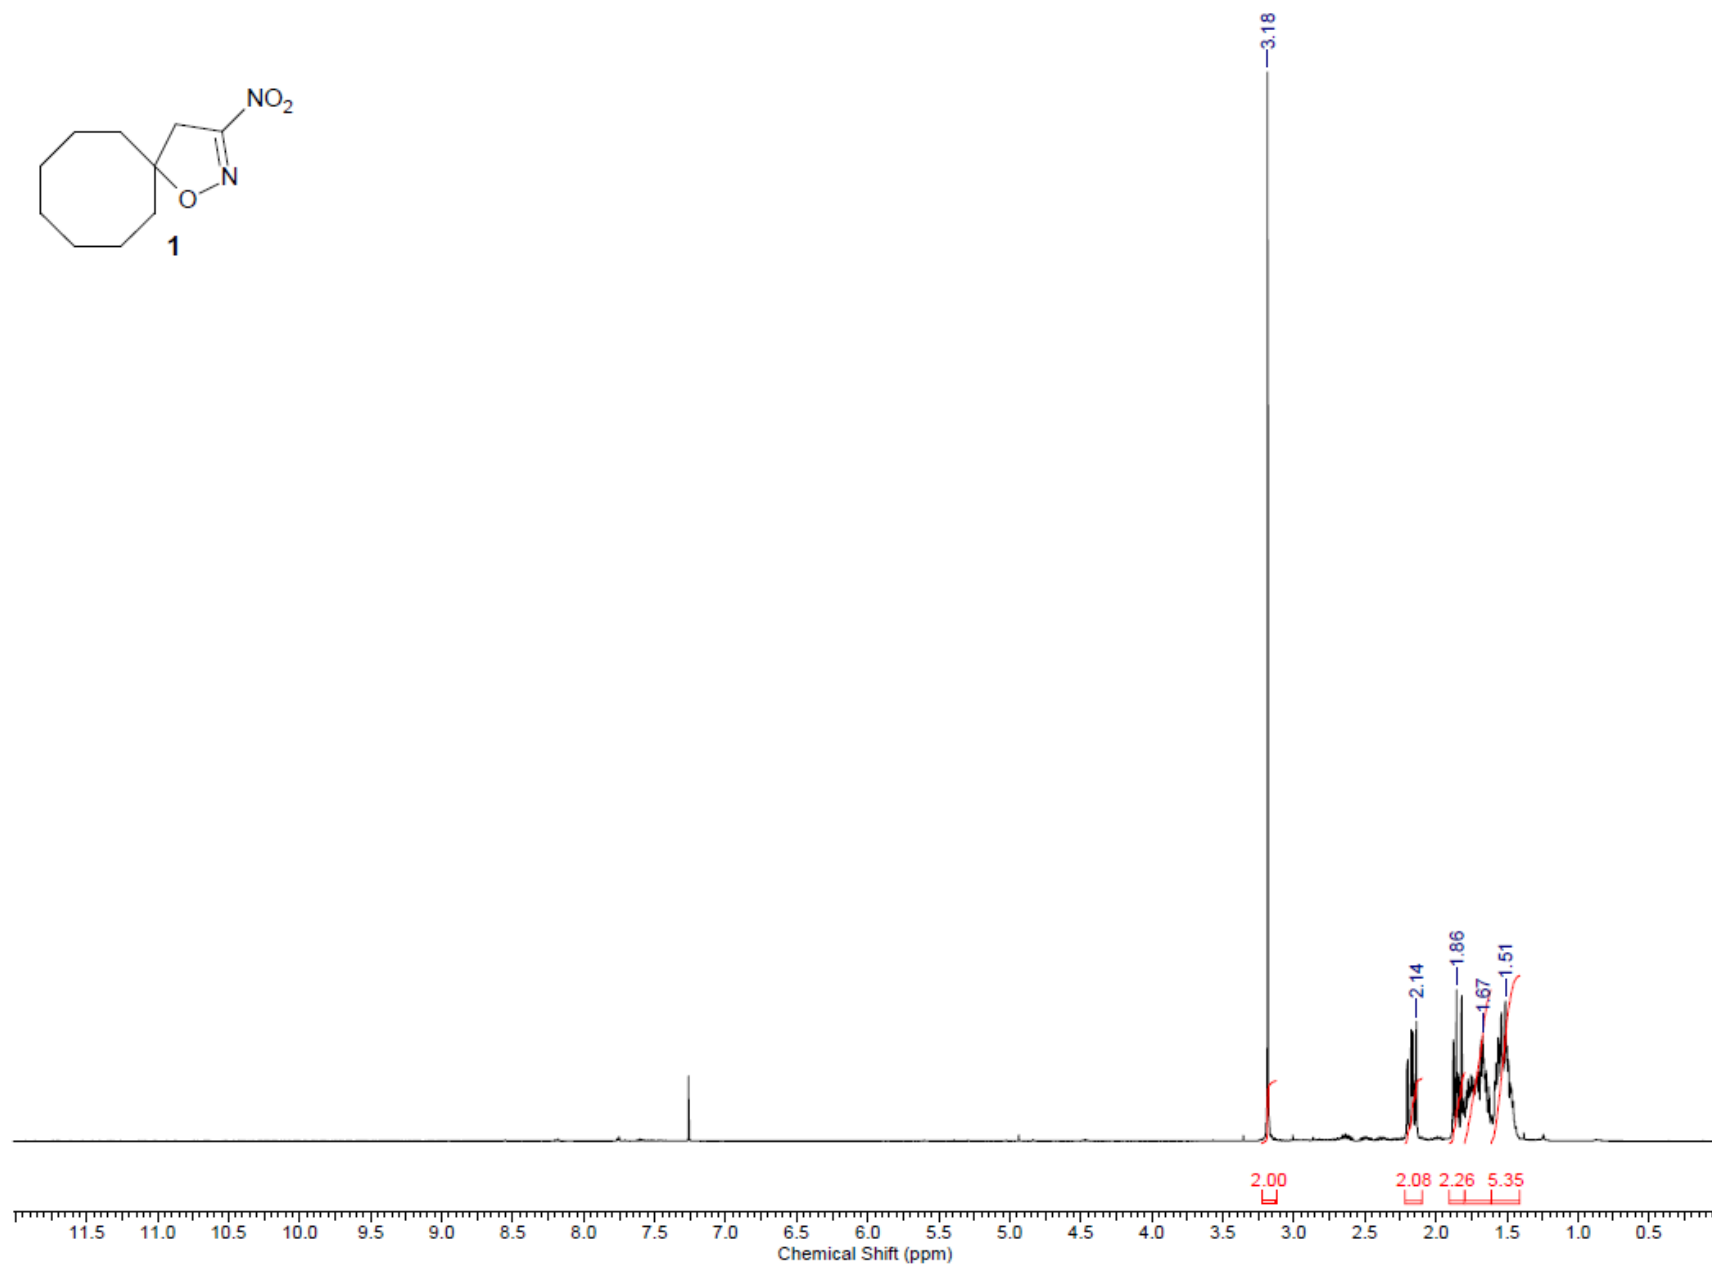

$^{13}\text{C}$  NMR ( $\text{CDCl}_3$ ) spectrum of compound **1**

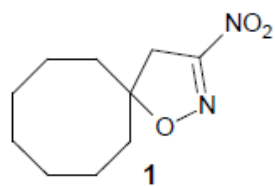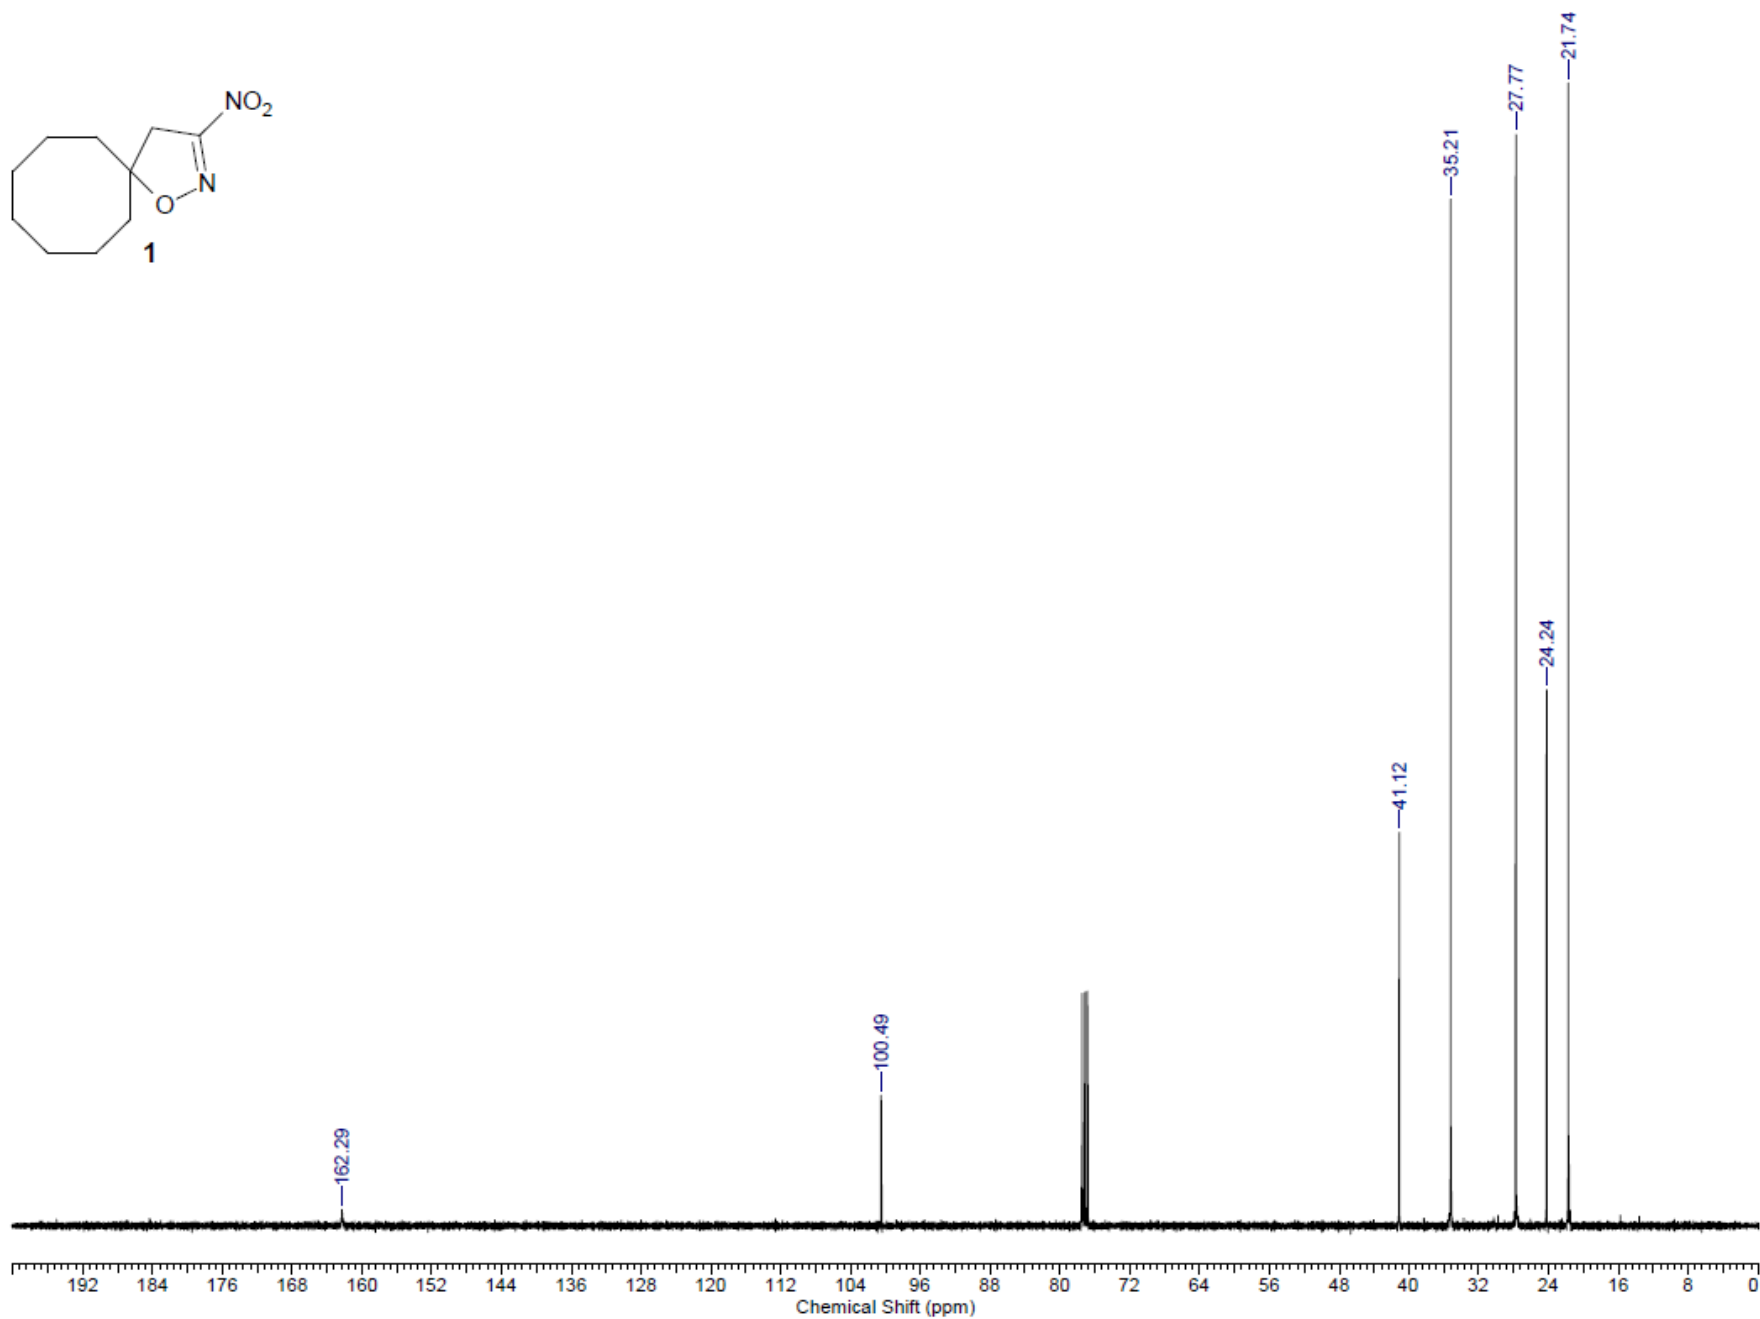

HSQC NMR (CDCl<sub>3</sub>) spectrum of compound 1

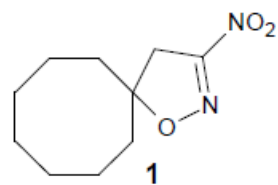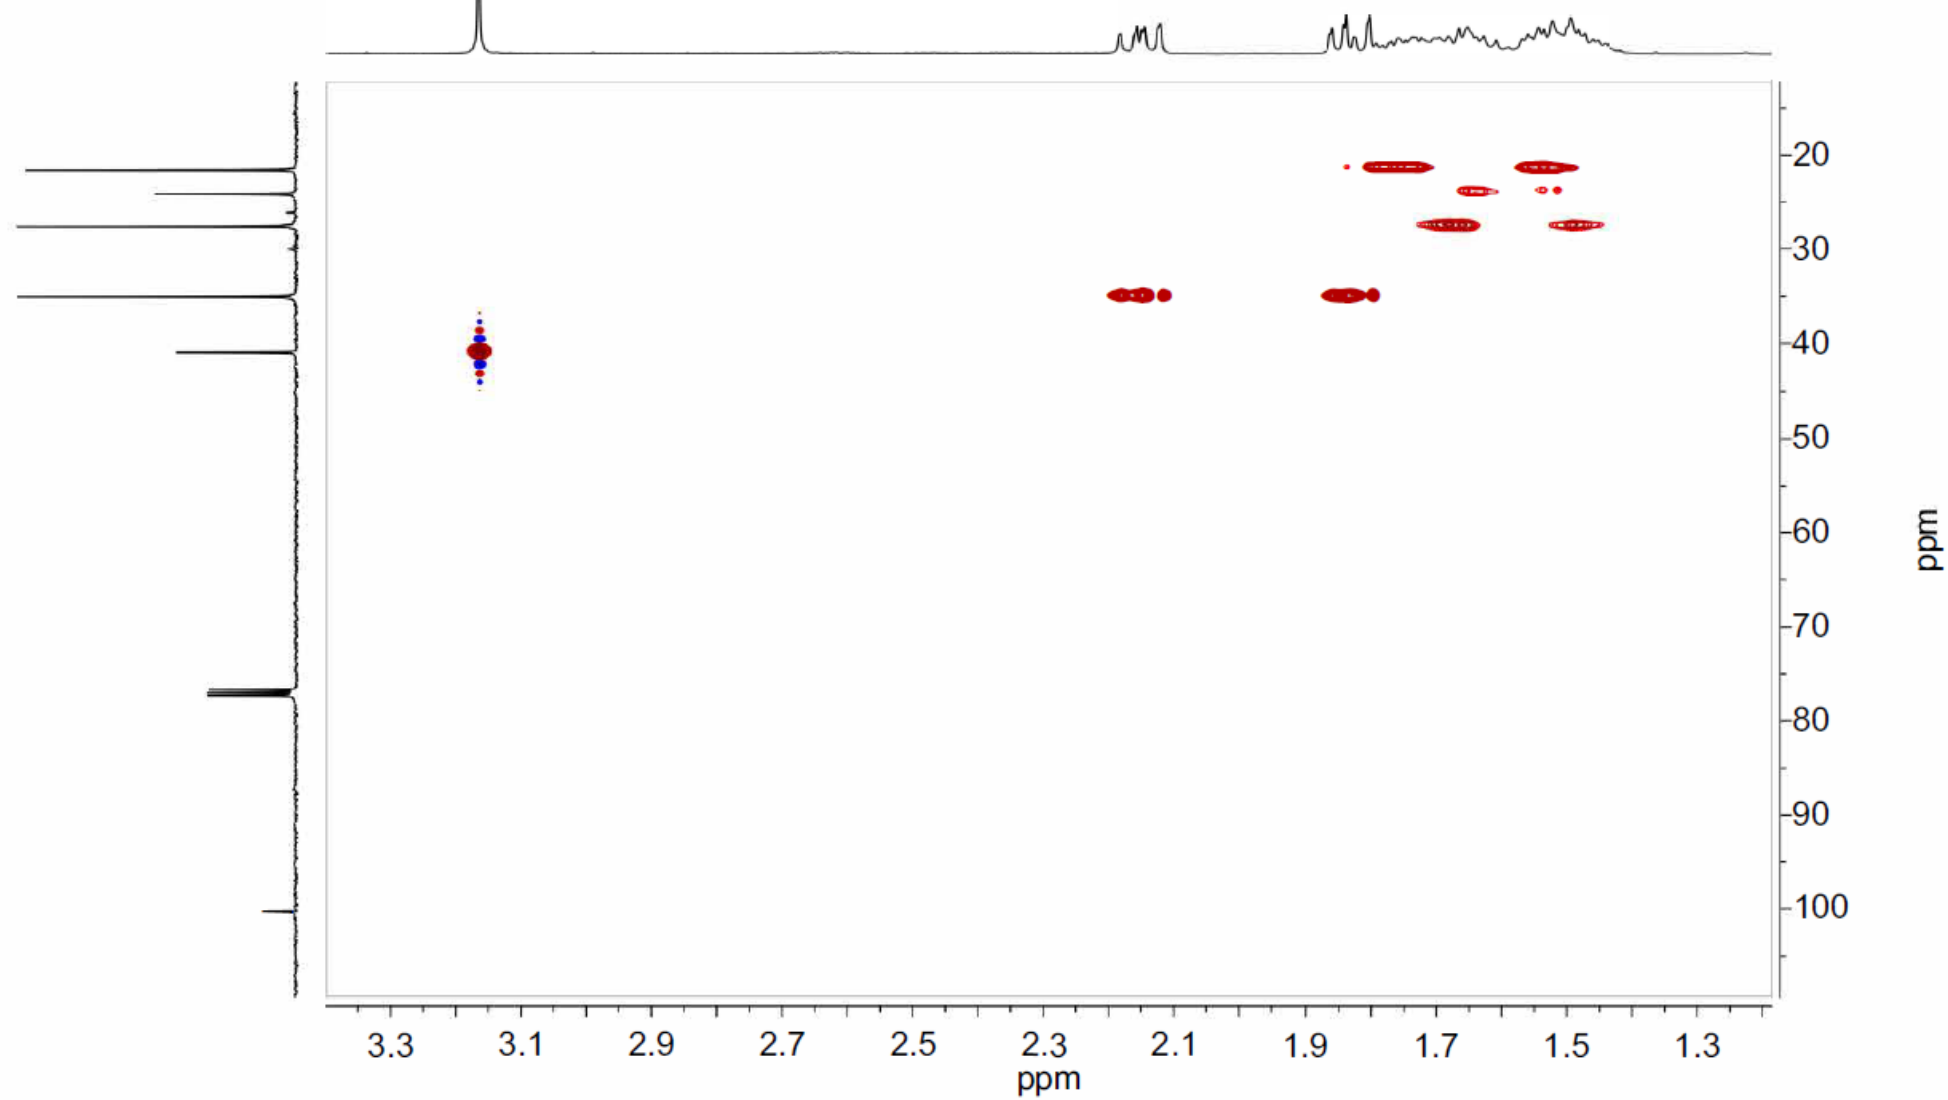

HMBC NMR (CDCl<sub>3</sub>) spectrum of compound 1

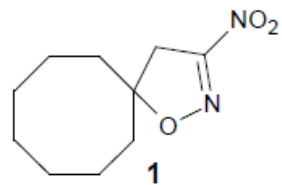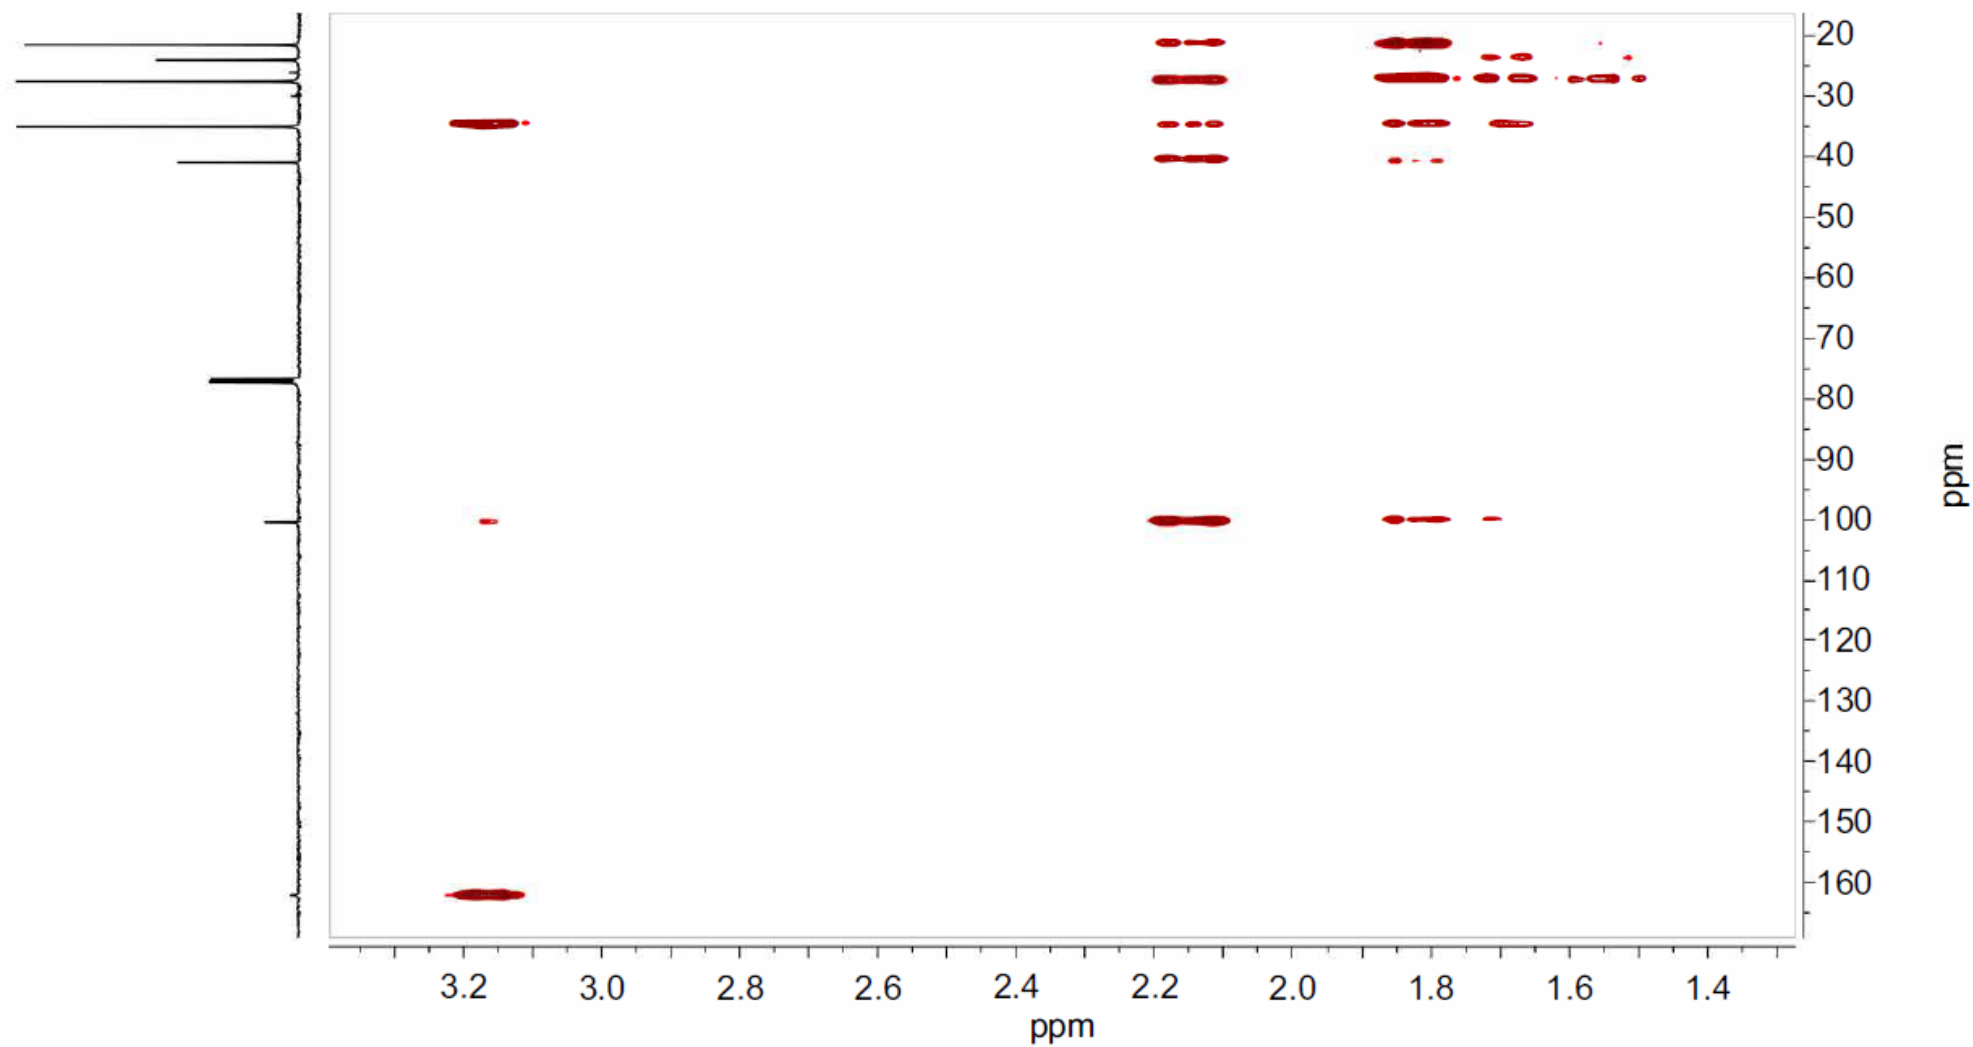

$^1\text{H}$  NMR ( $\text{CDCl}_3$ ) spectrum of compound **2**

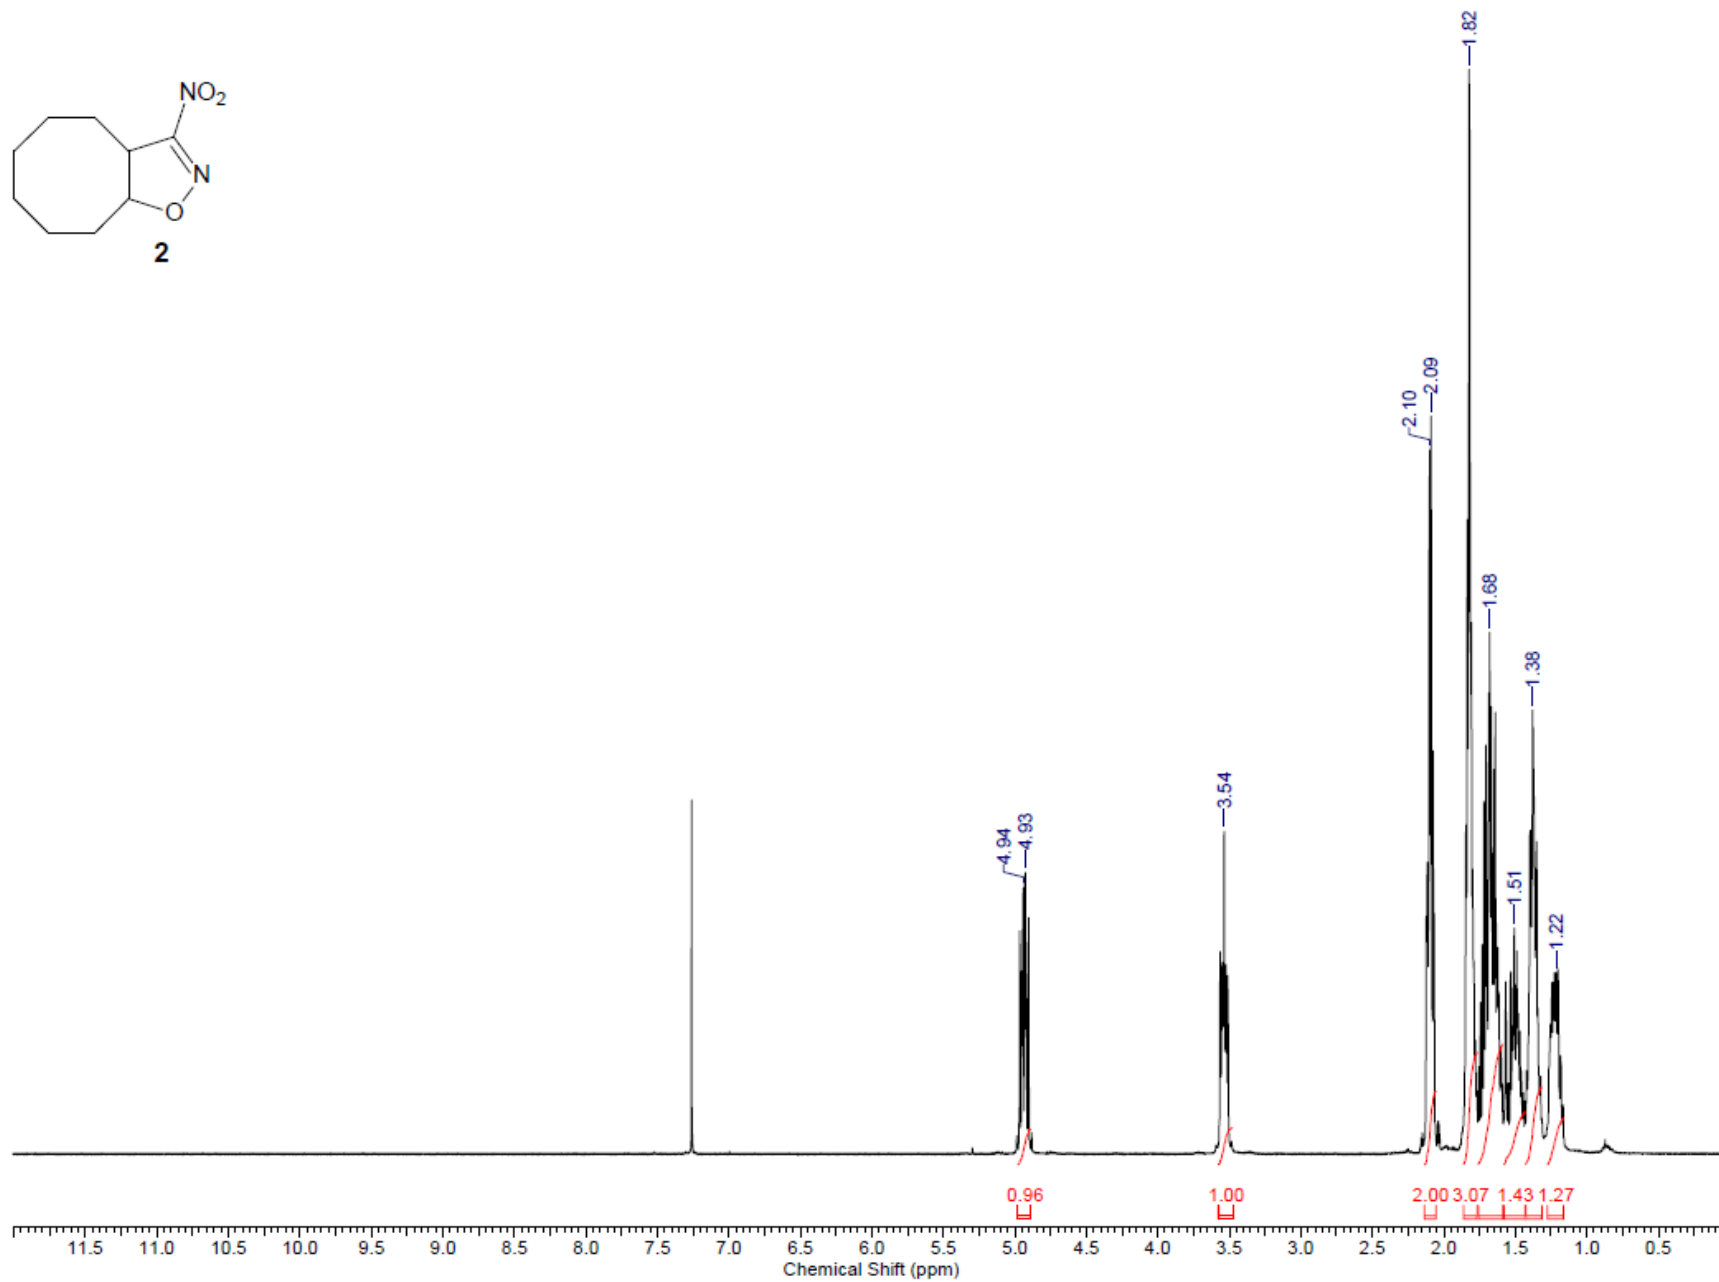

$^{13}\text{C}$  NMR ( $\text{CDCl}_3$ ) spectrum of compound **2**

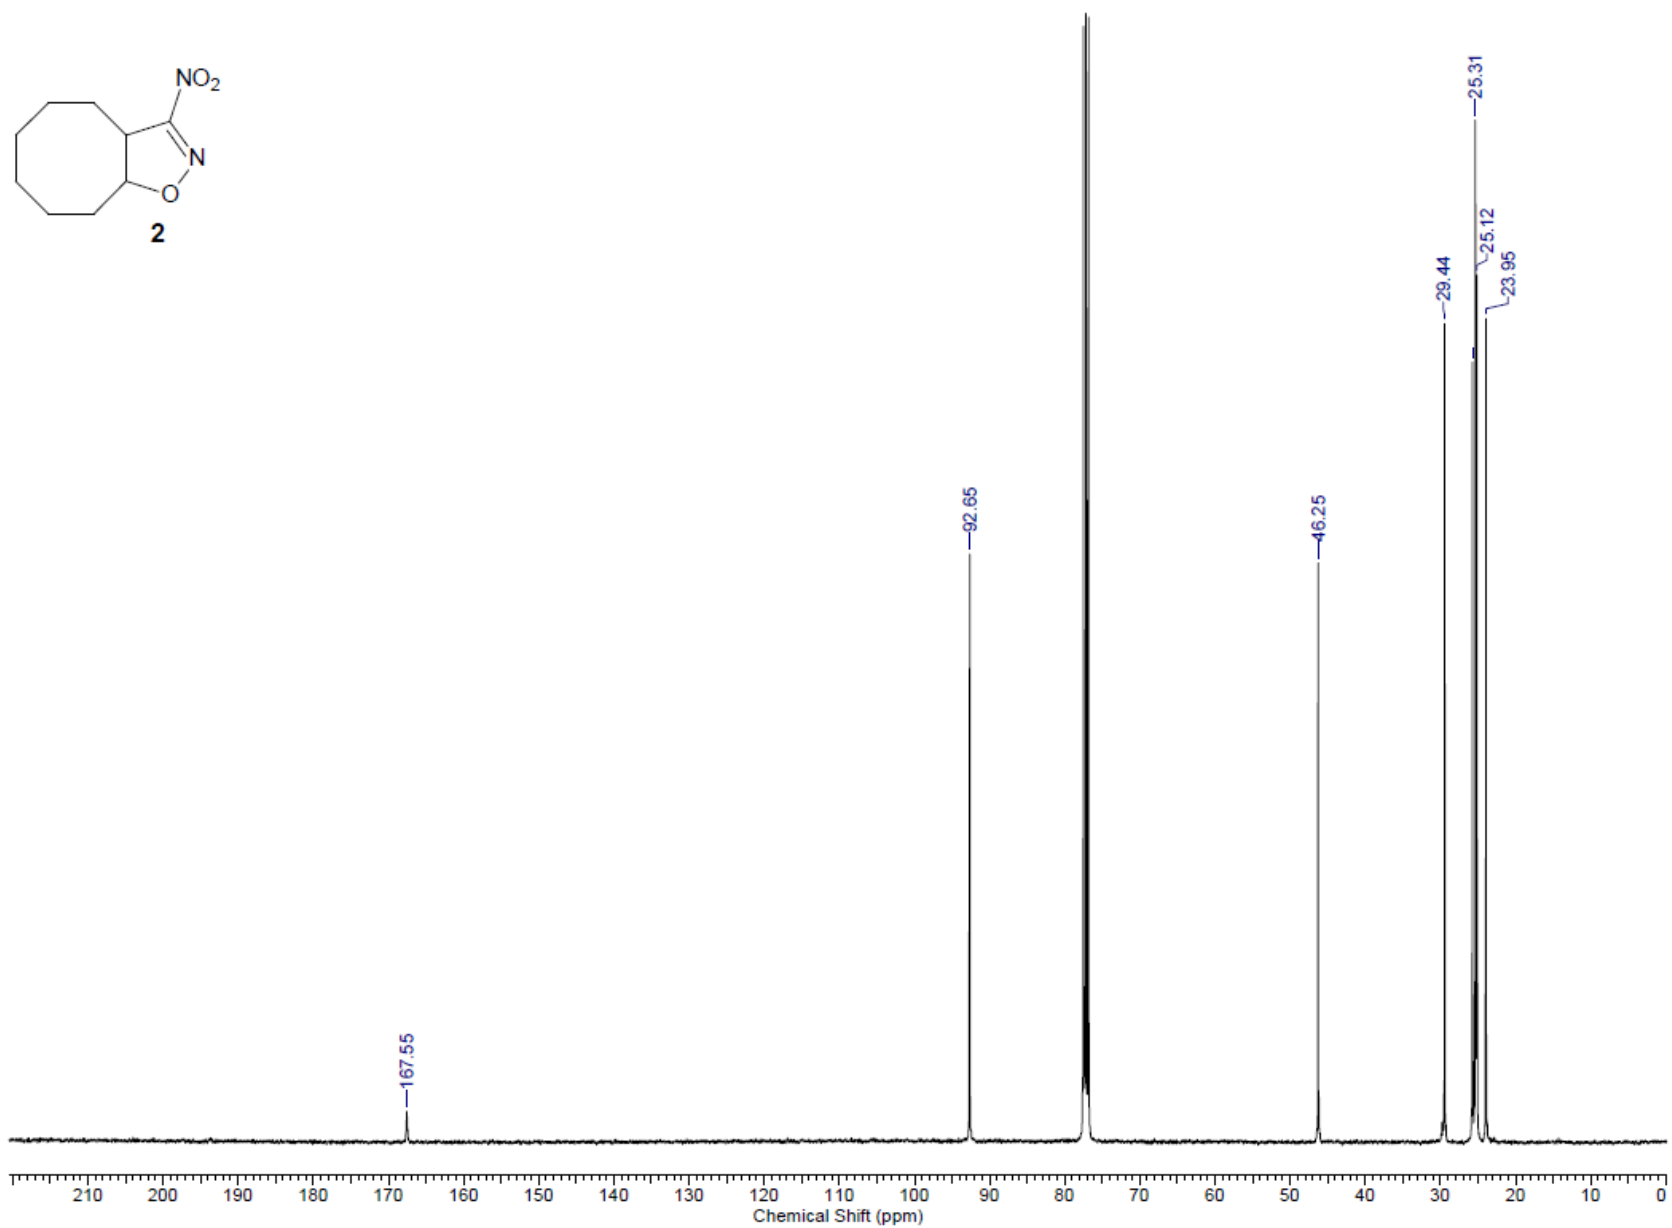

HSQC NMR (CDCl<sub>3</sub>) spectrum of compound 2

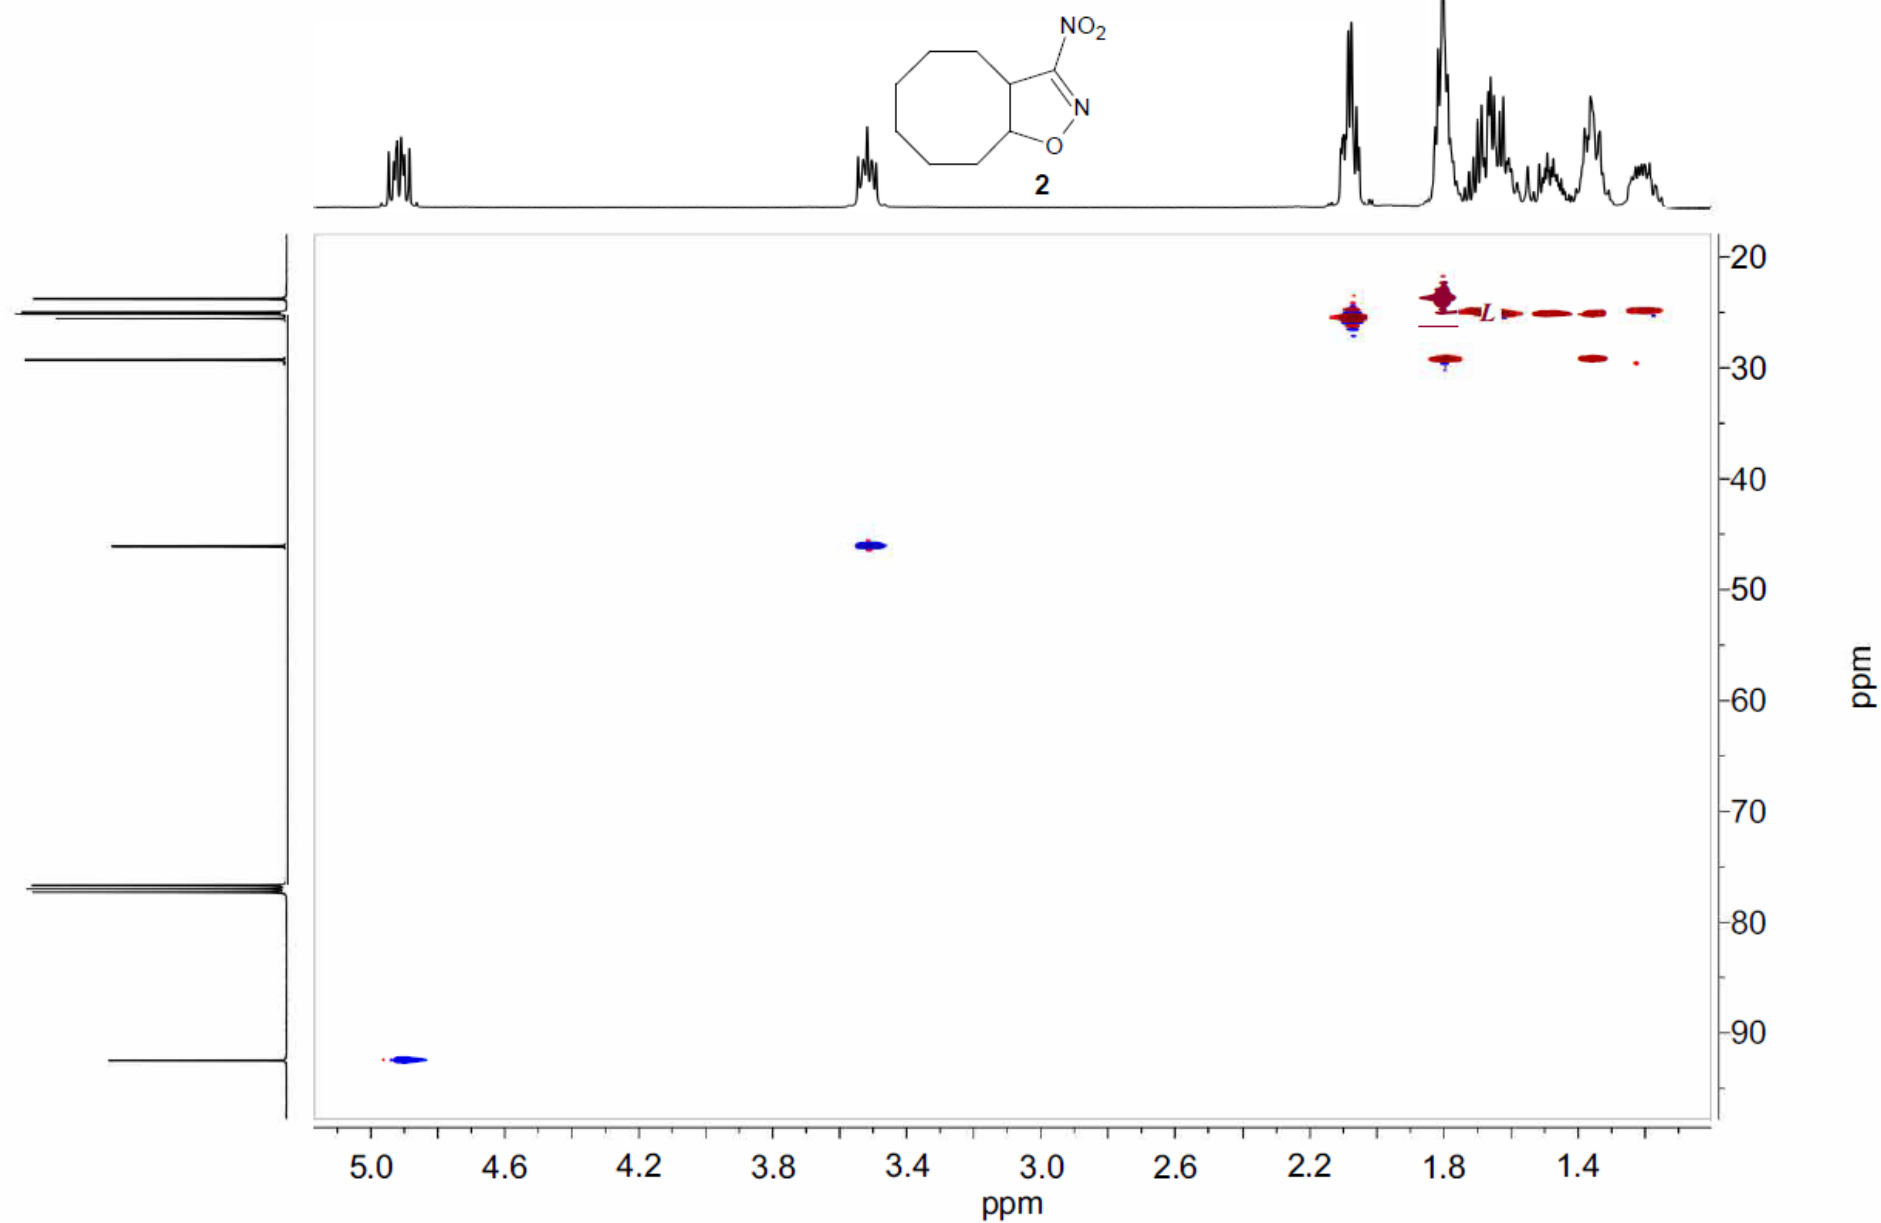



HMBC NMR (CDCl<sub>3</sub>) spectrum of compound 2

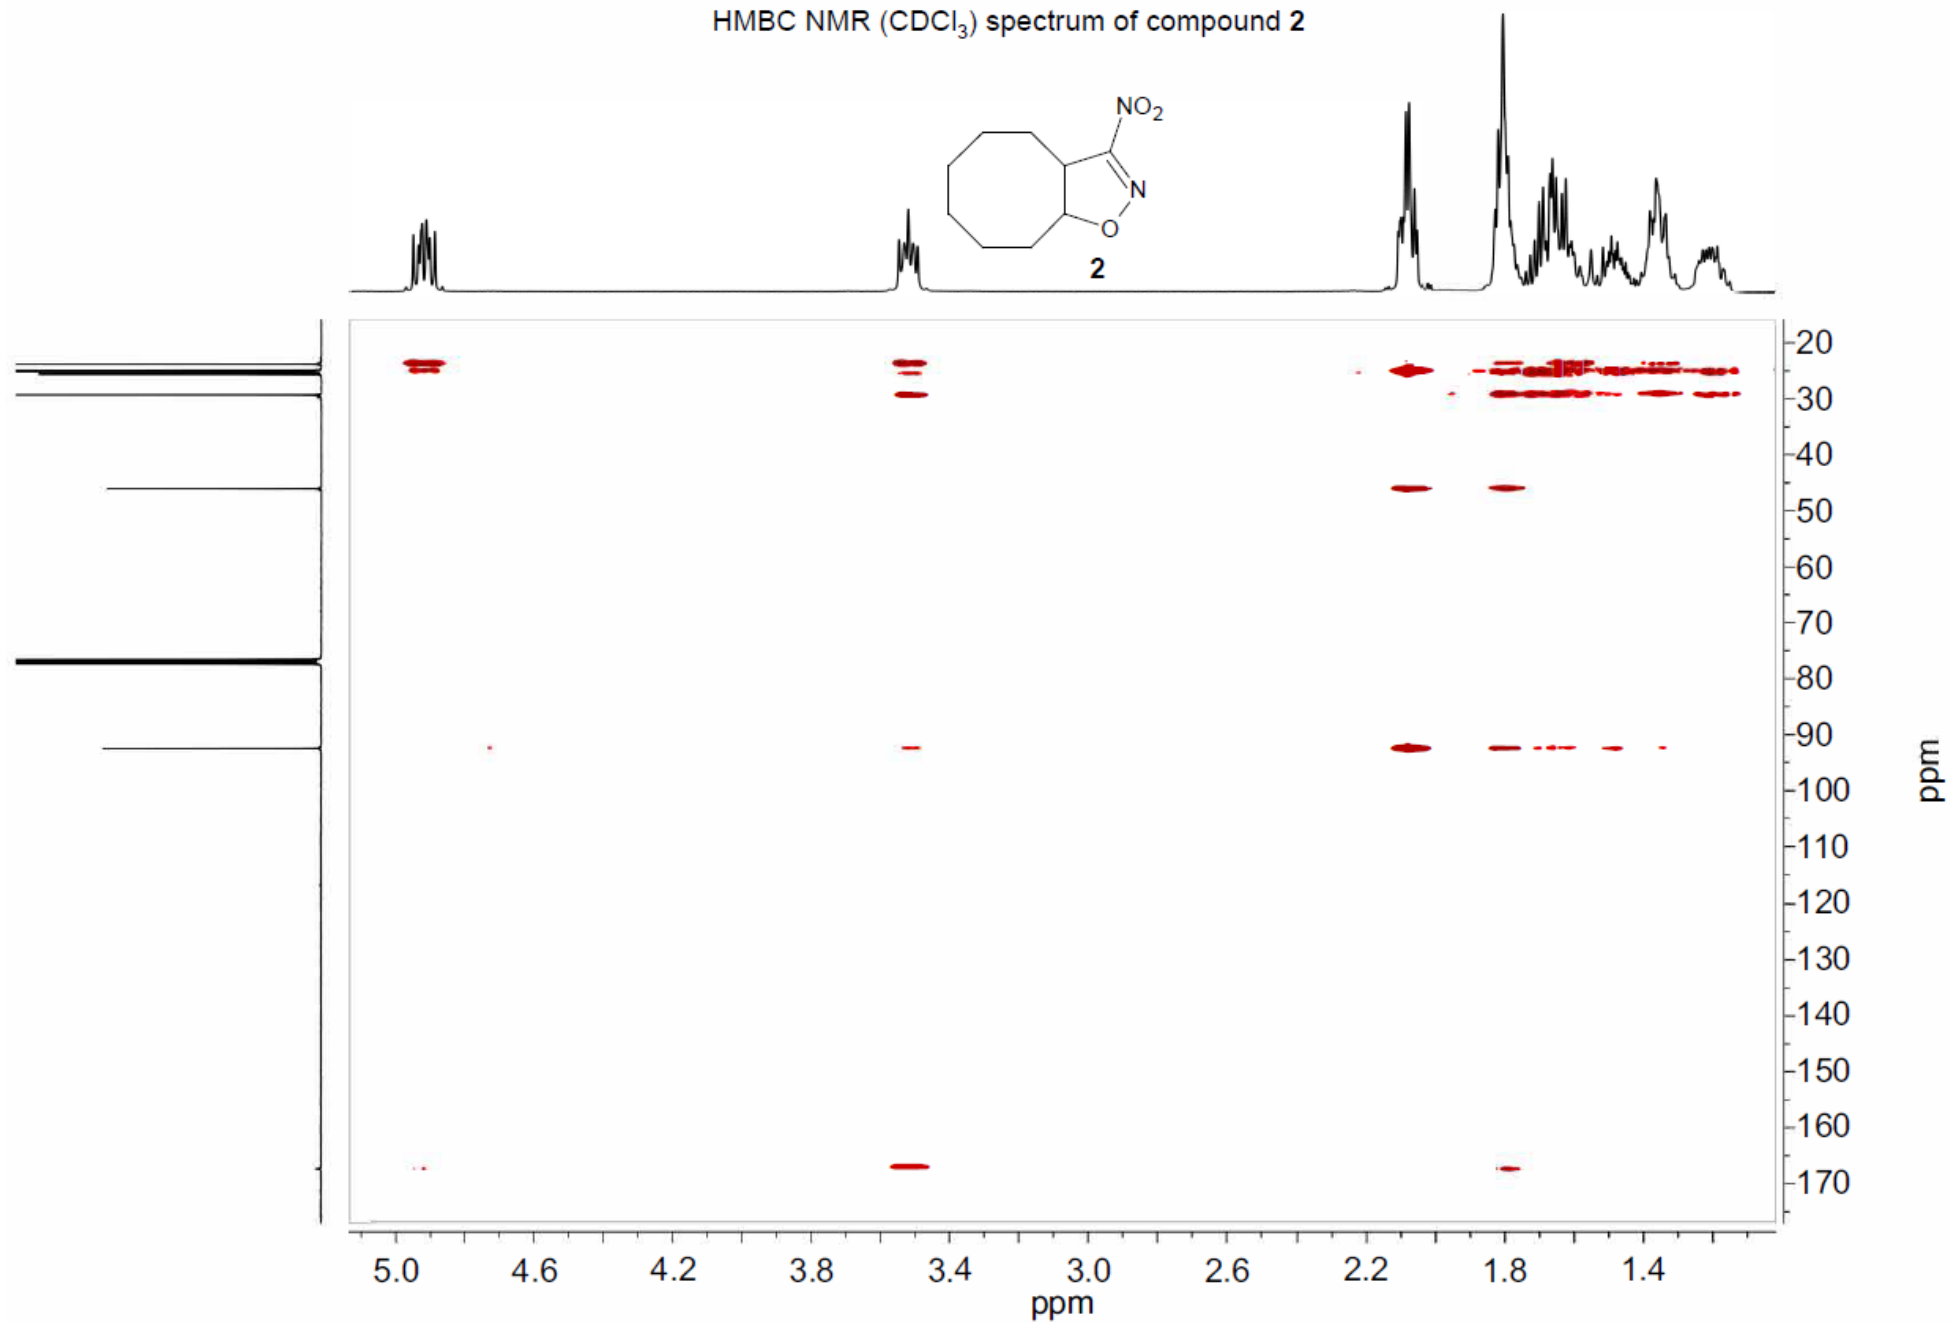

$^1\text{H}$  NMR ( $\text{CDCl}_3$ ) spectrum of compound **3**

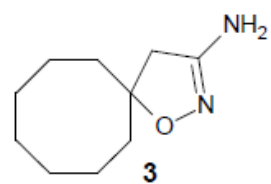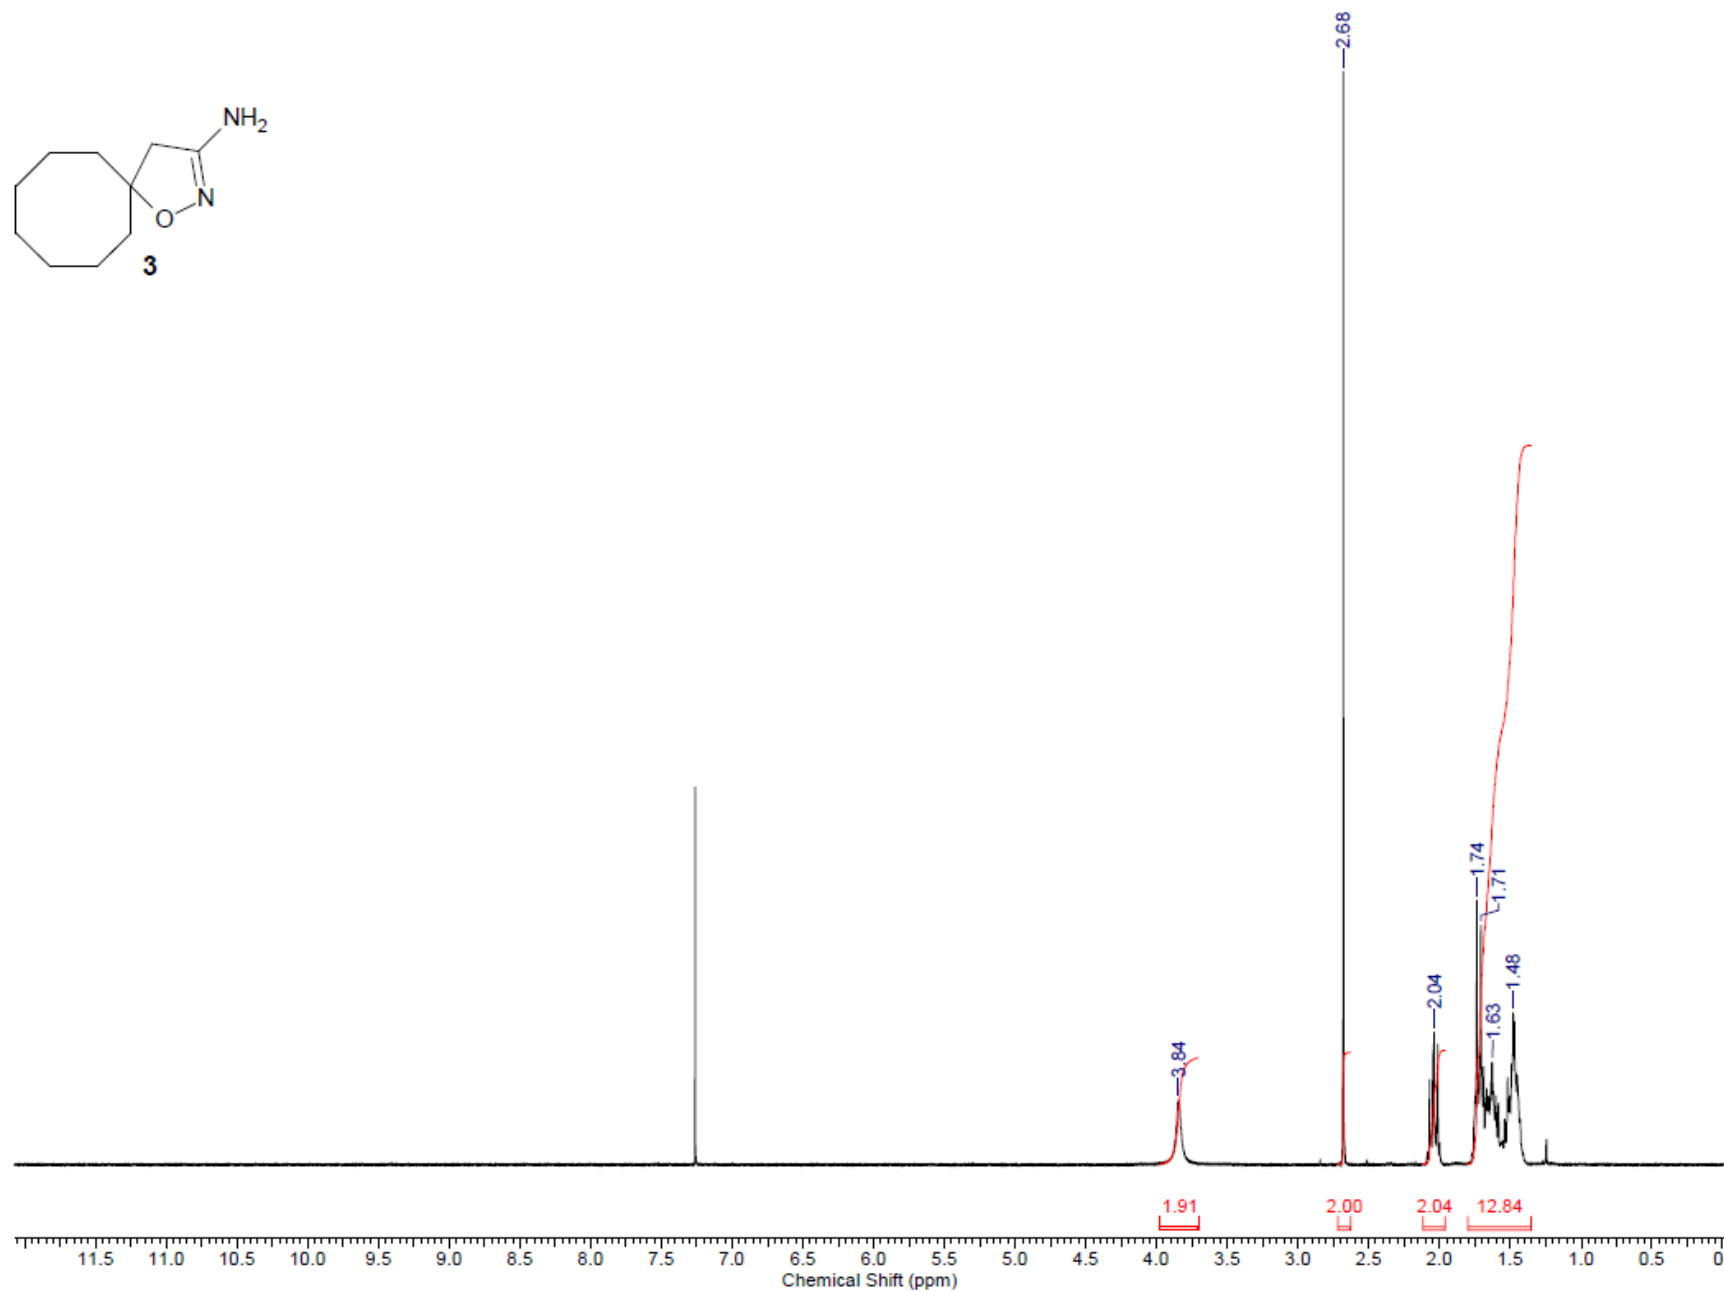

$^{13}\text{C}$  NMR ( $\text{CDCl}_3$ ) spectrum of compound **3**

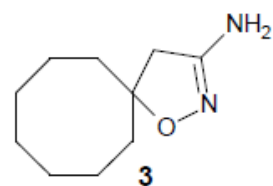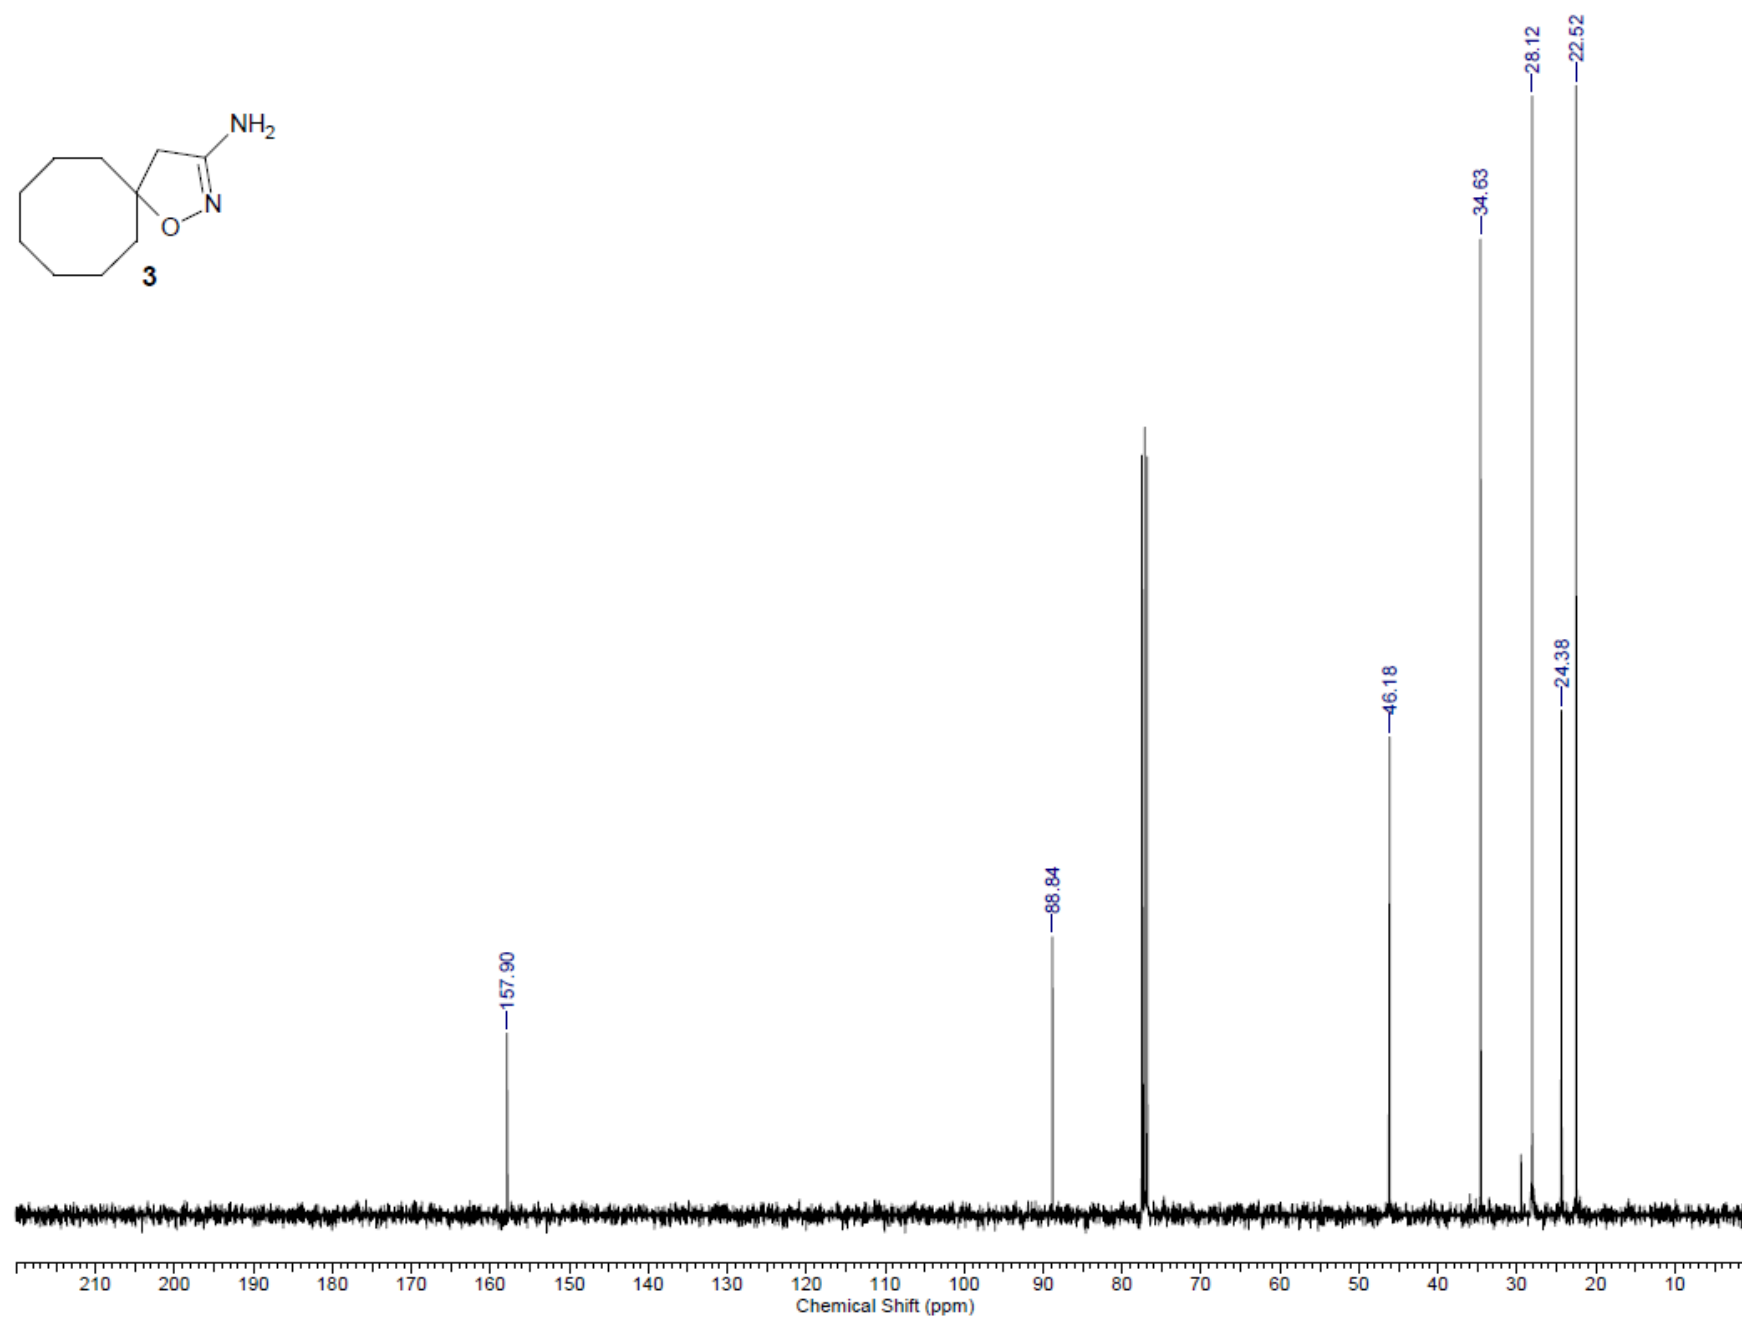

$^1\text{H}$  NMR ( $\text{CDCl}_3$ ) spectrum of compound **4**

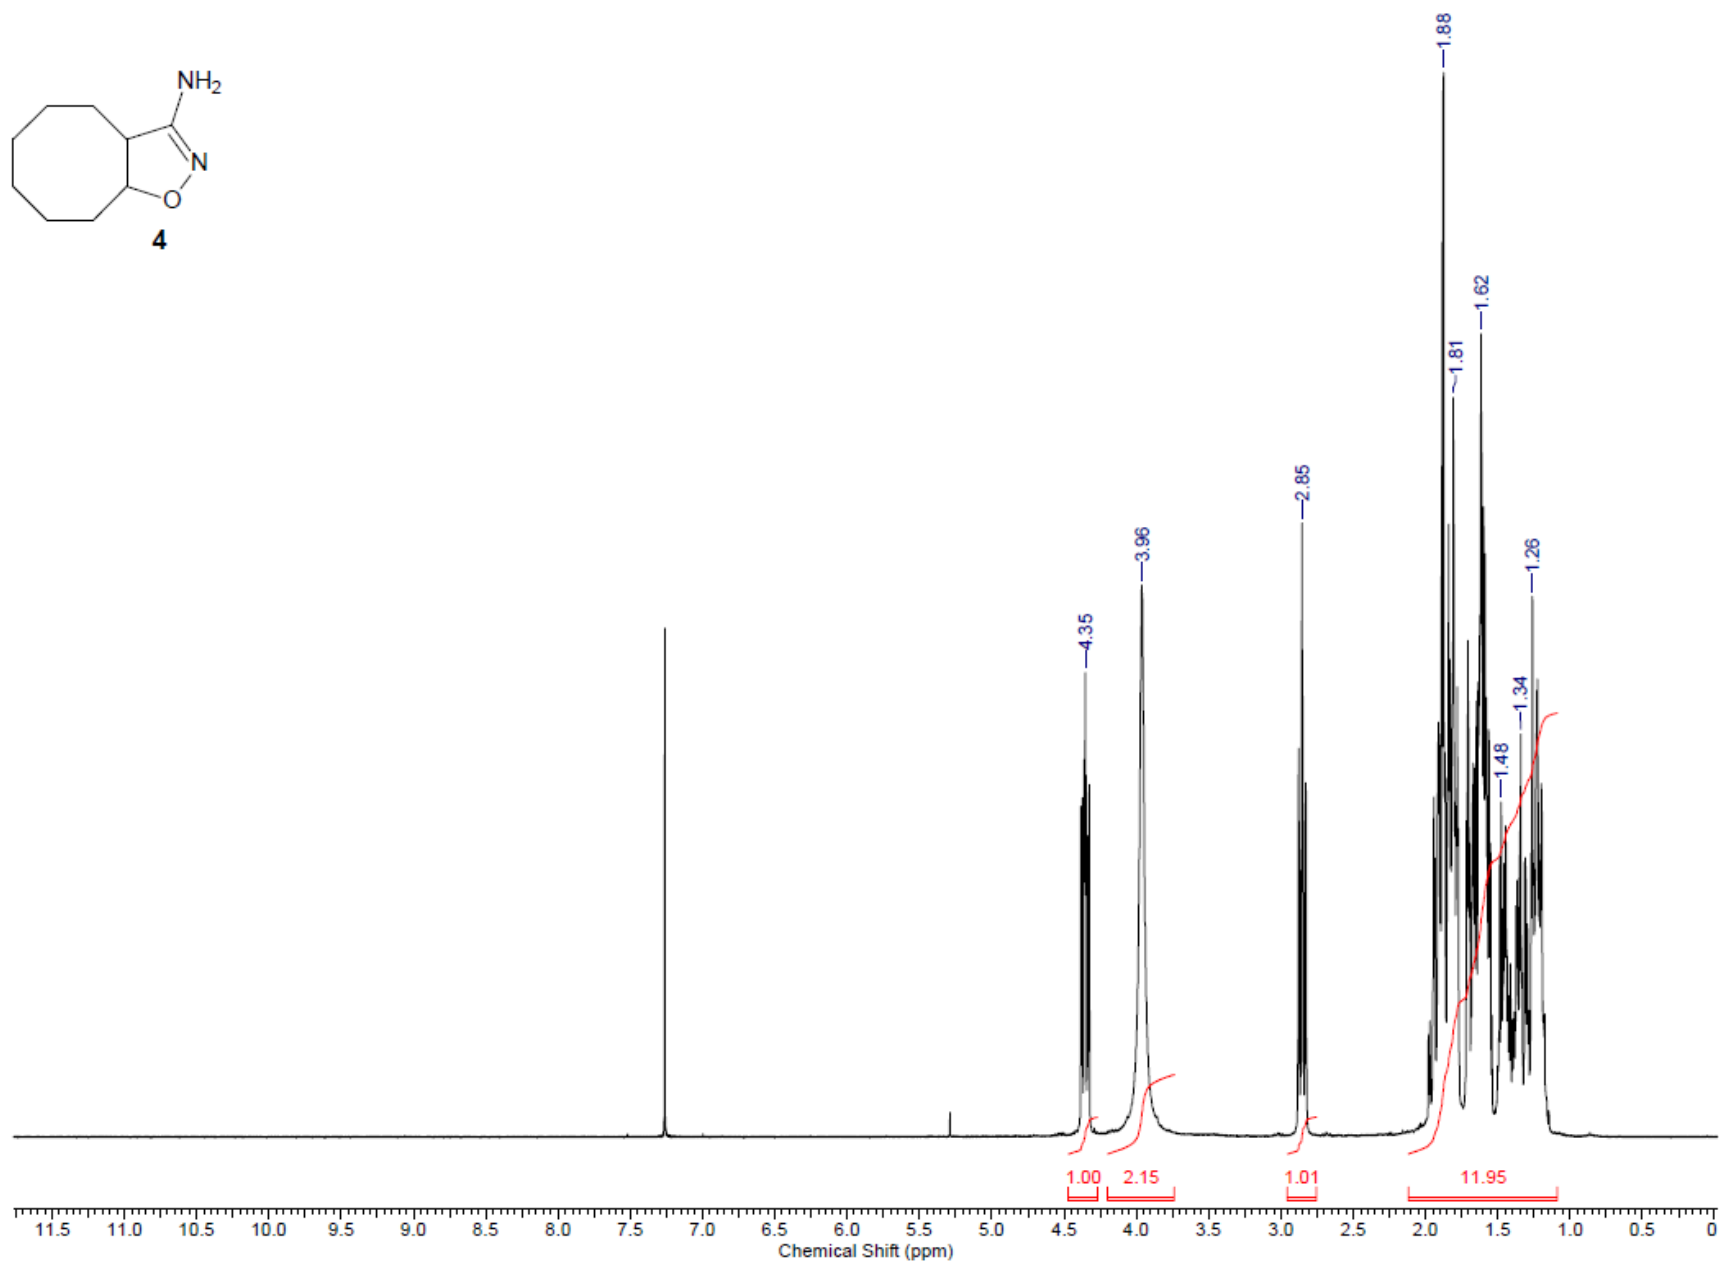

$^{13}\text{C}$  NMR ( $\text{CDCl}_3$ ) spectrum of compound **4**

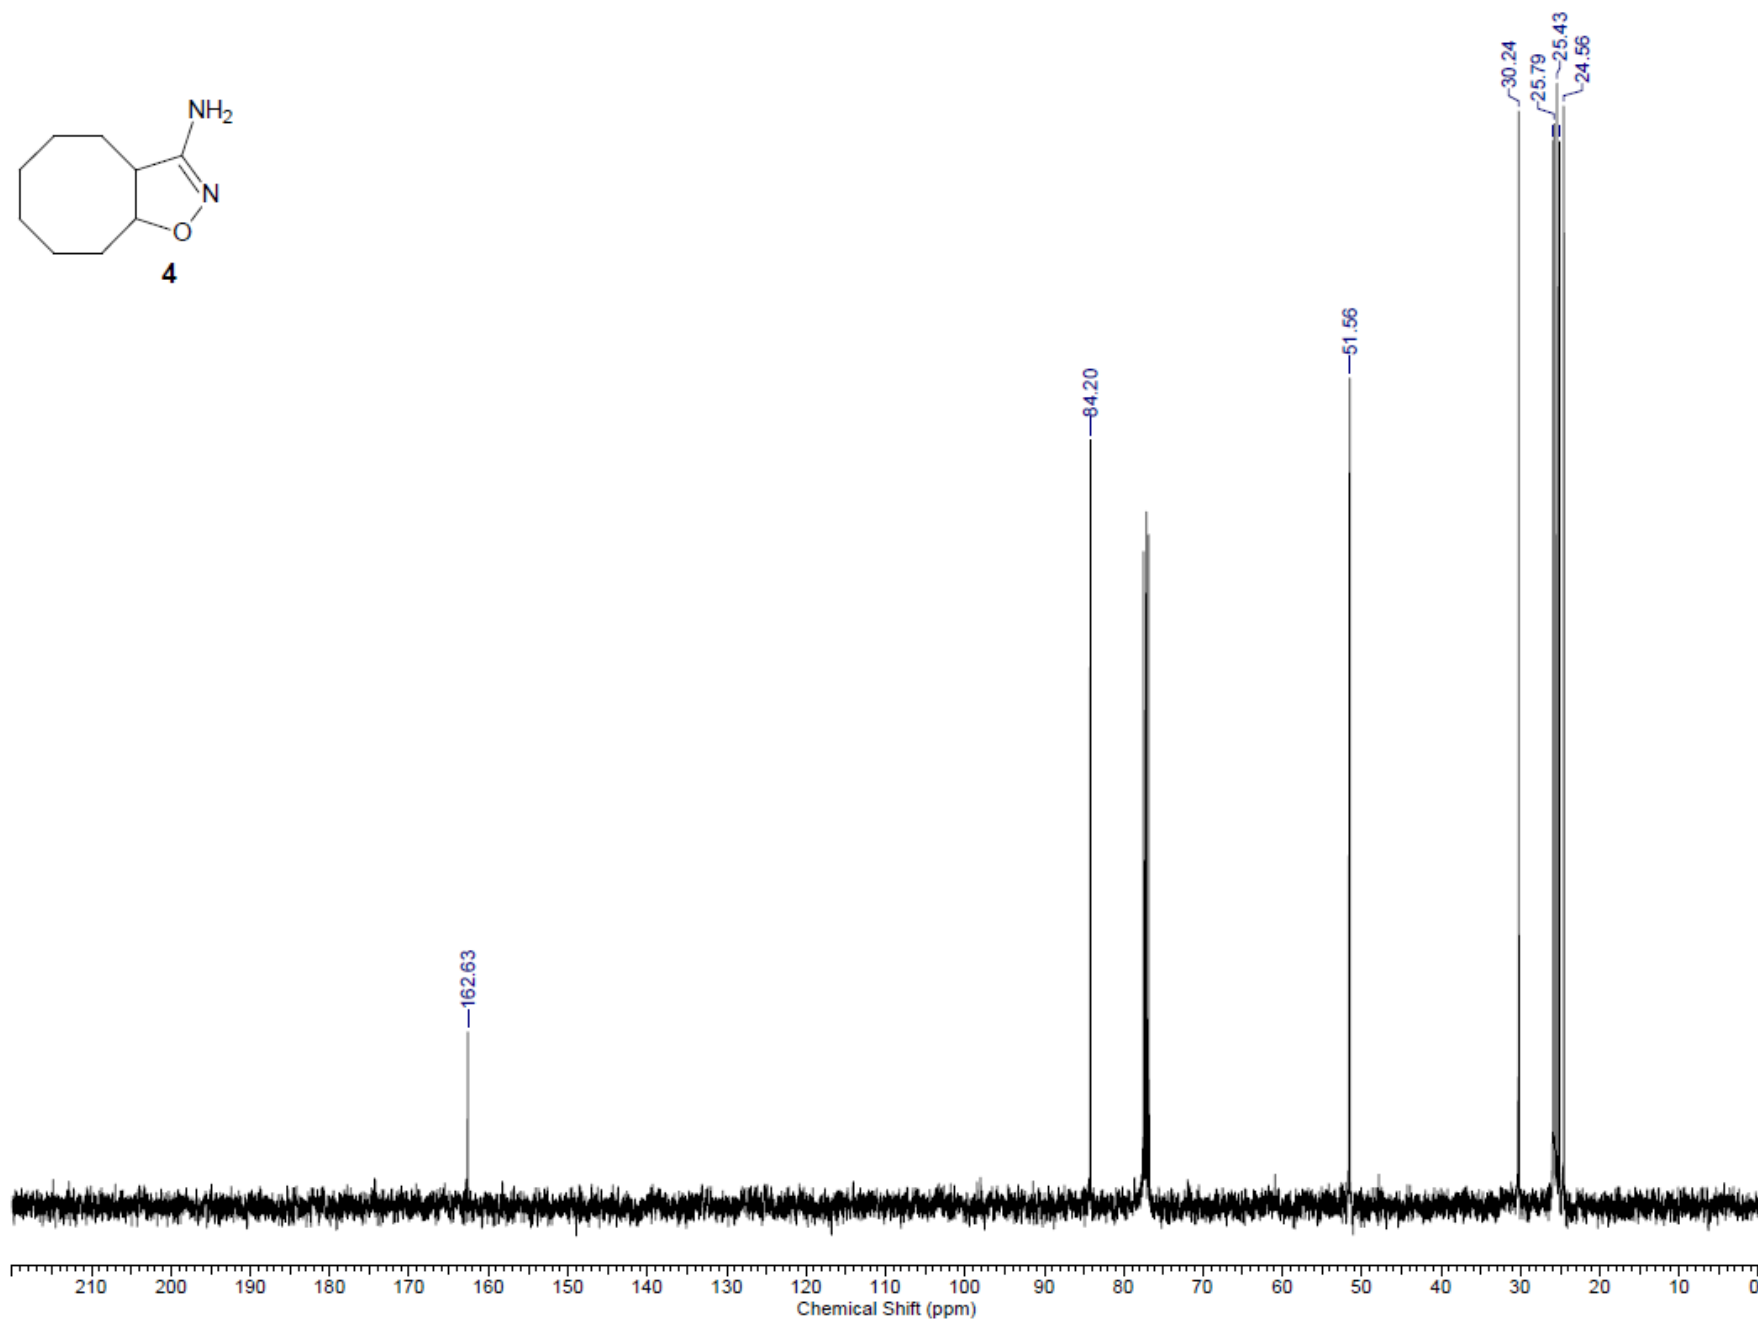

HSQC (CDCl<sub>3</sub>) spectrum of compound 4

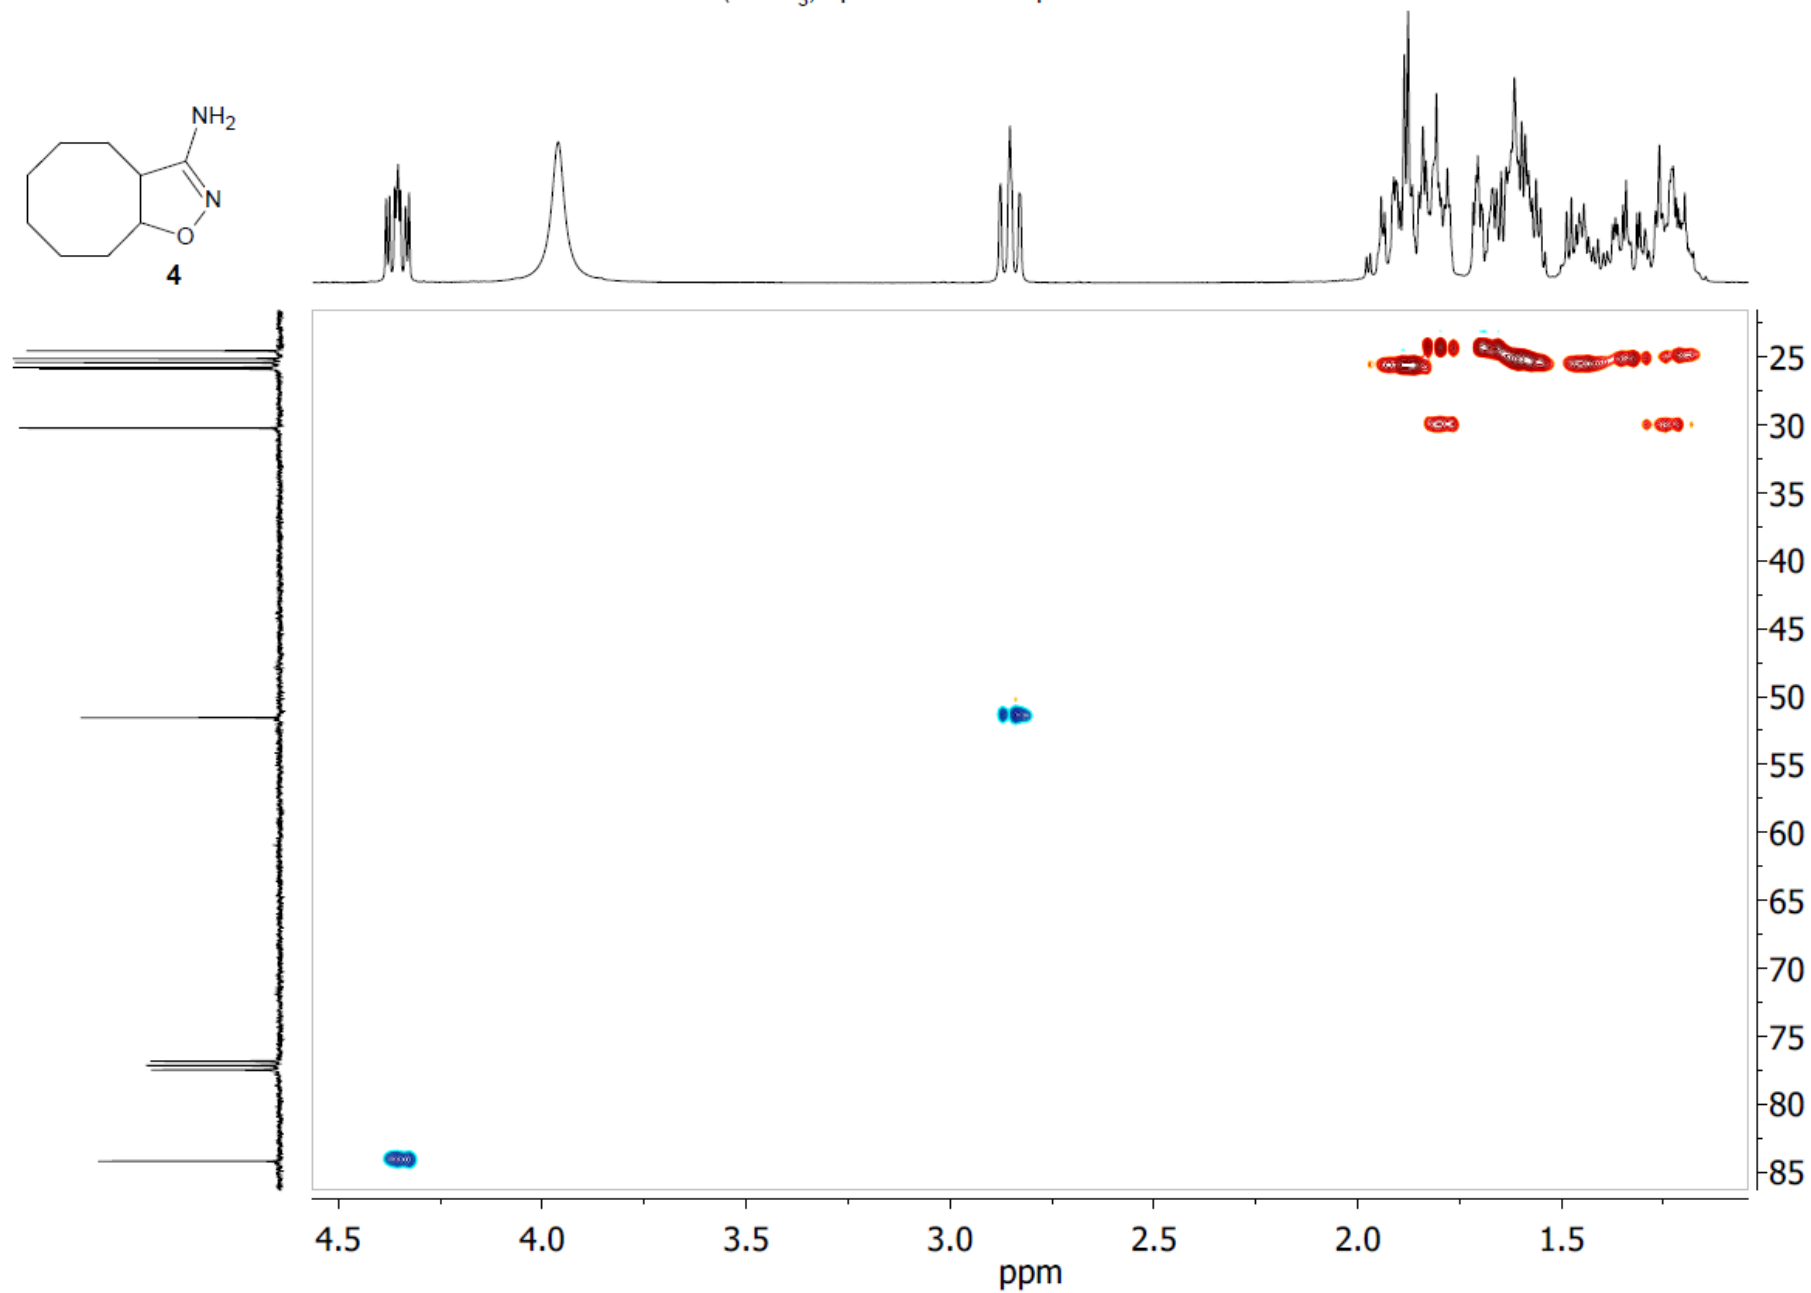

<sup>1</sup>H NMR (CDCl<sub>3</sub>) spectrum of compound **5a**

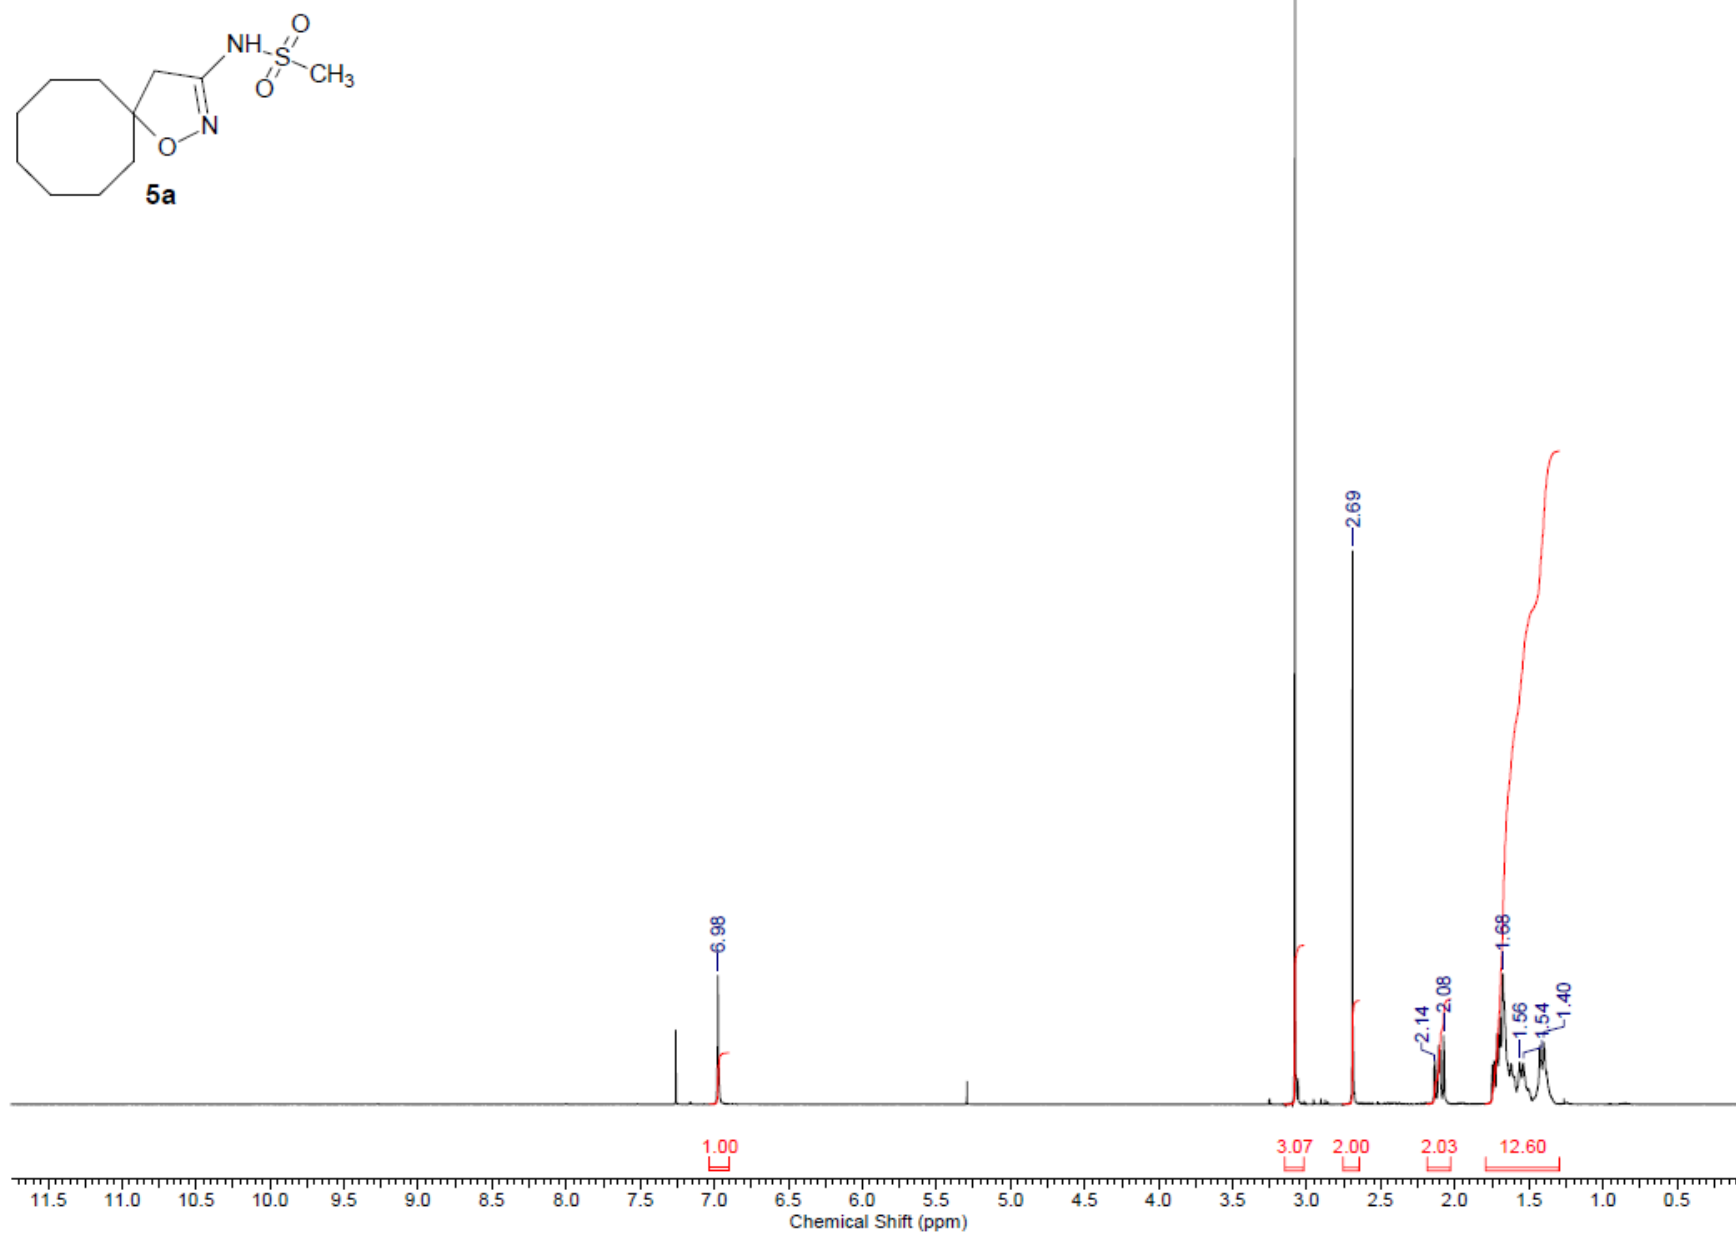

$^{13}\text{C}$  NMR ( $\text{CDCl}_3$ ) spectrum of compound **5a**

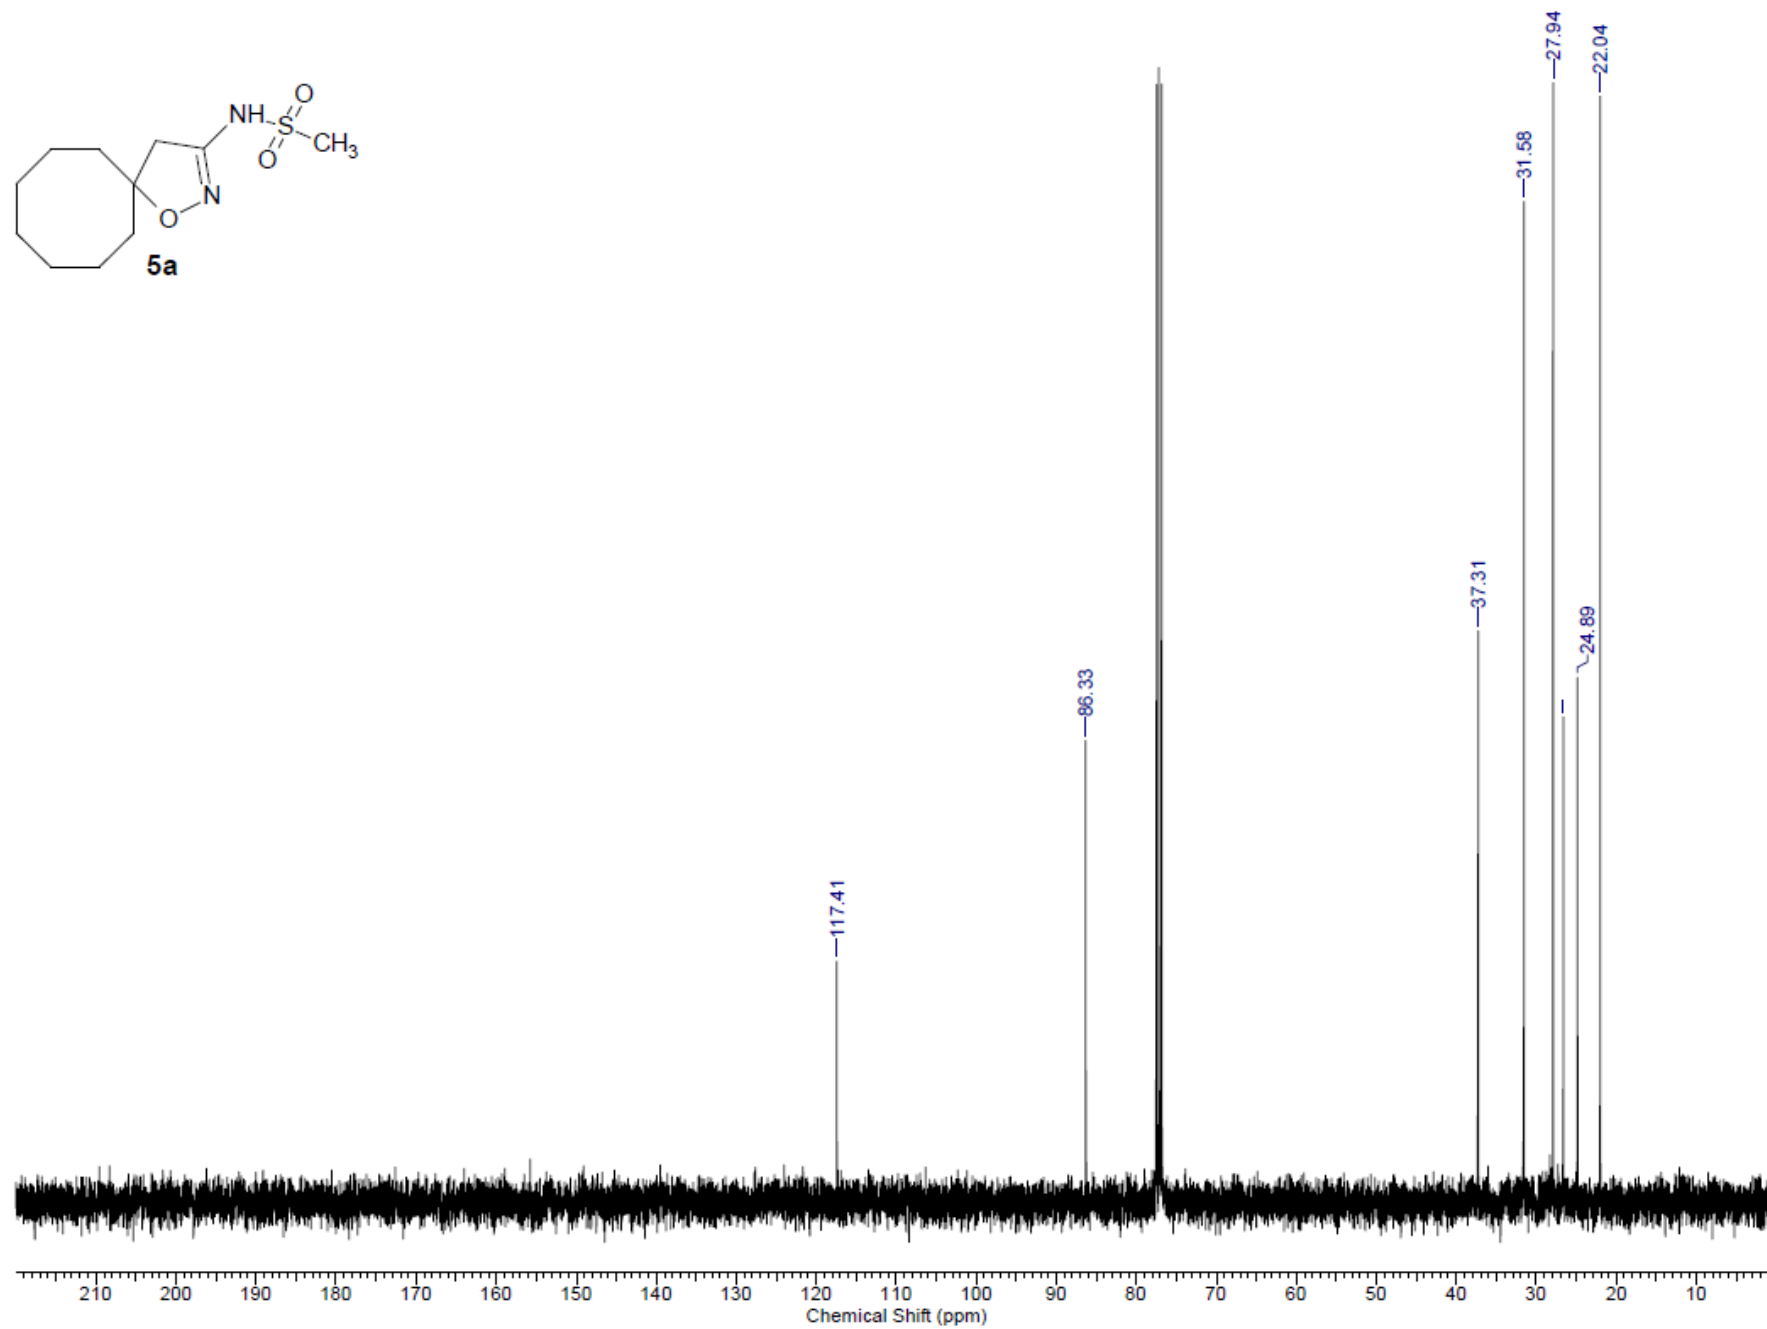



$^1\text{H}$  NMR ( $\text{CDCl}_3$ ) spectrum of compound **5b**

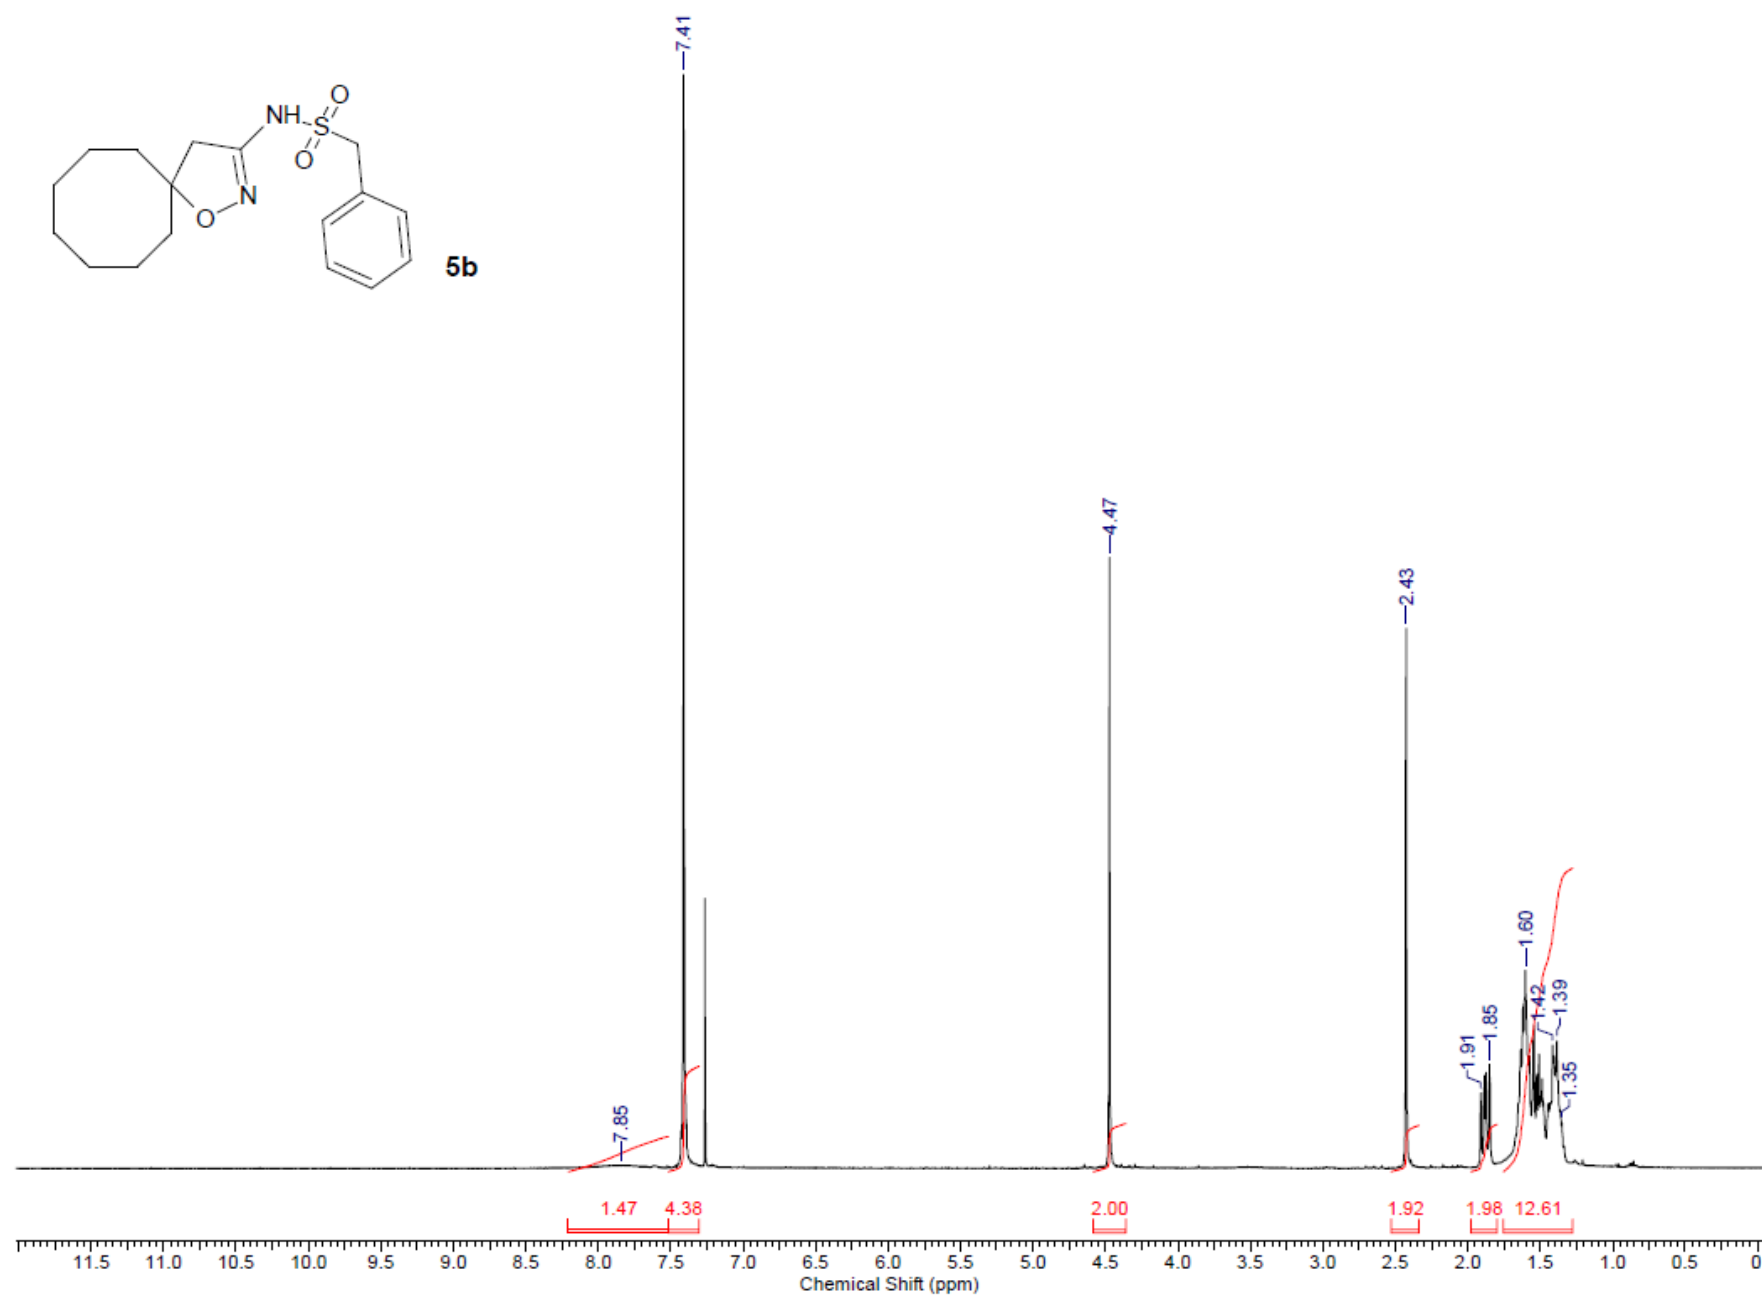

$^{13}\text{C}$  NMR ( $\text{CDCl}_3$ ) spectrum of compound **5b**

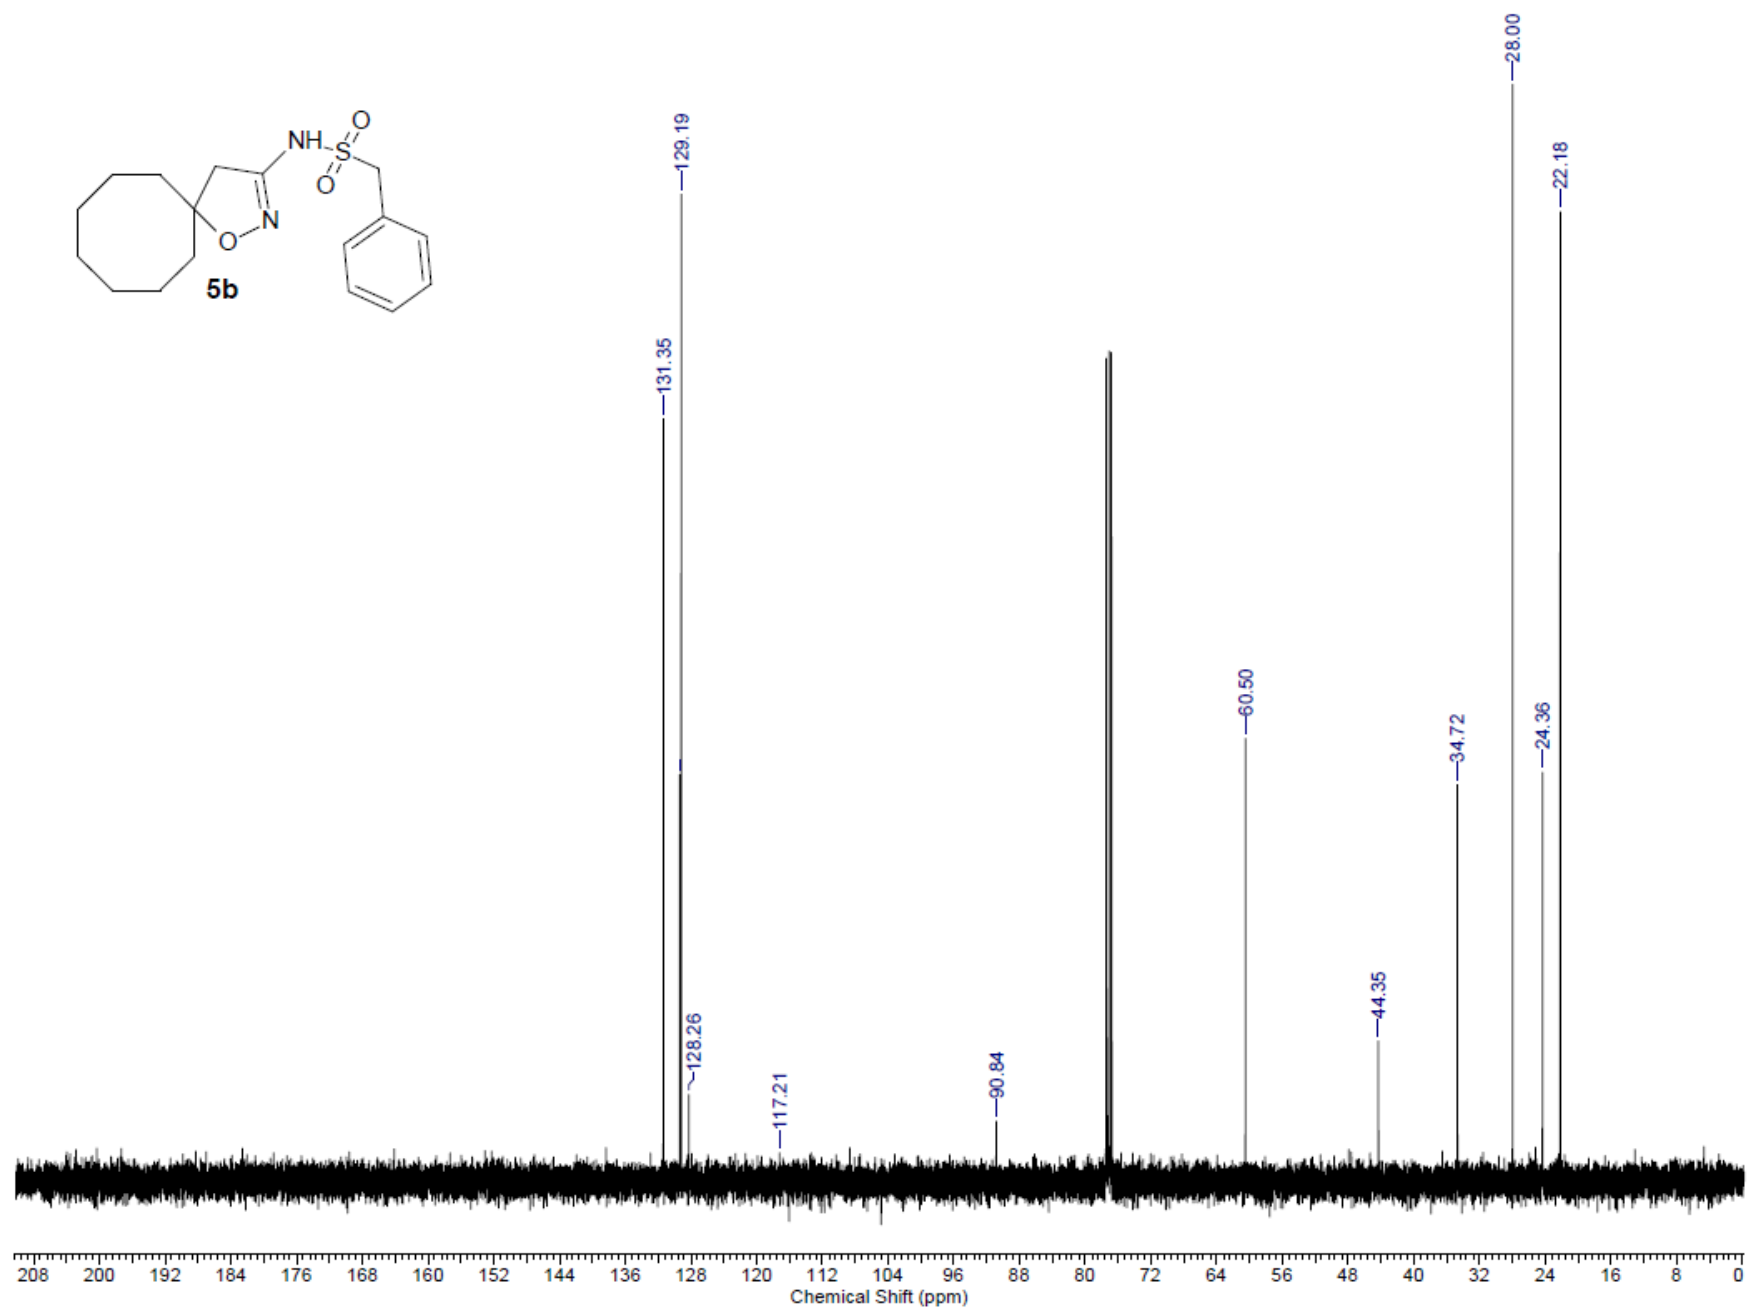

HSQC (CDCl<sub>3</sub>) spectrum of compound 5b

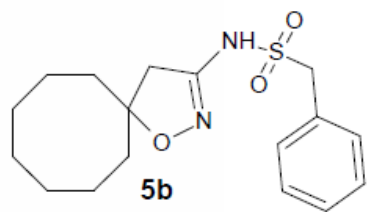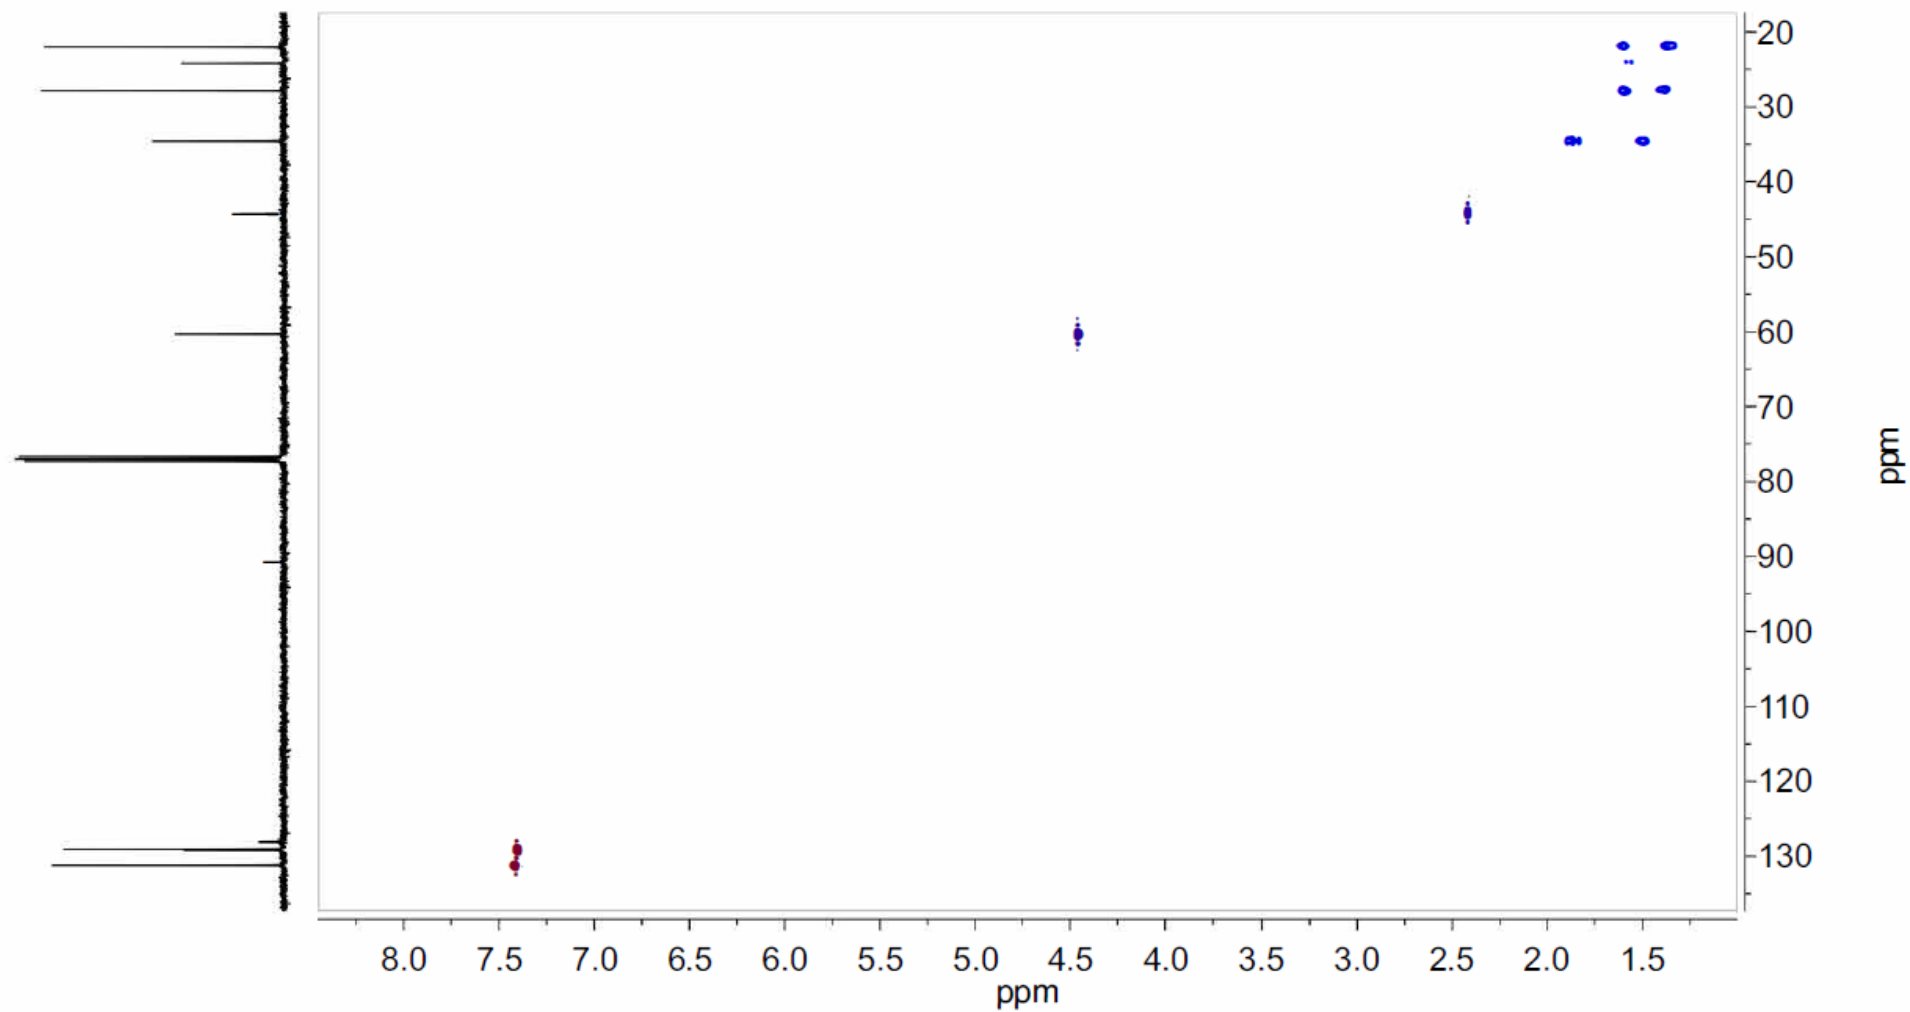

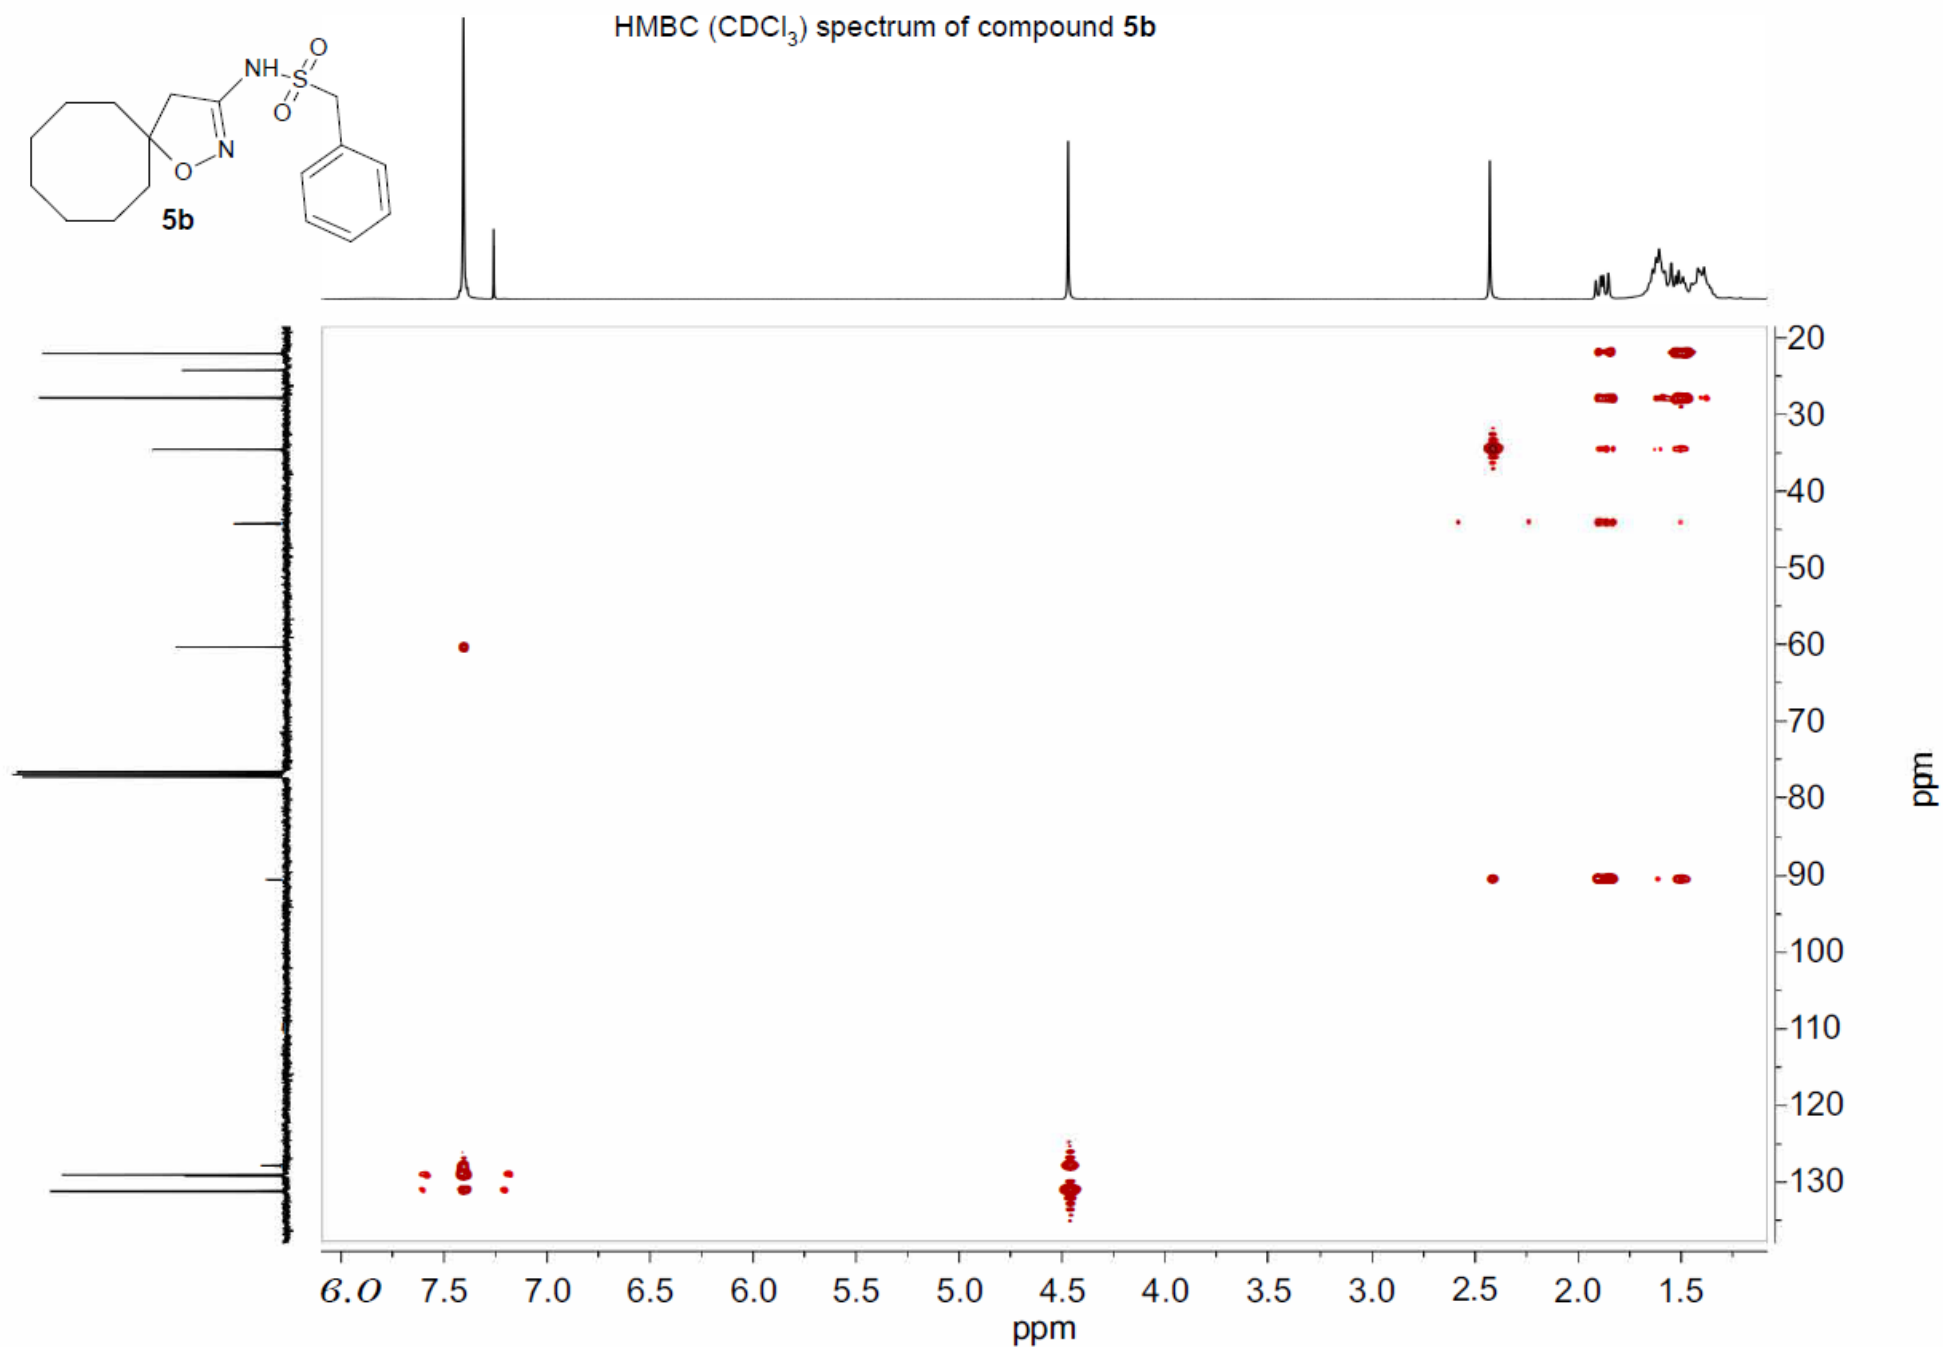

$^1\text{H}$  NMR ( $\text{CDCl}_3$ ) spectrum of compound **5c**

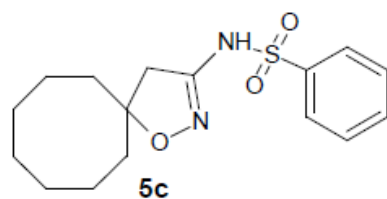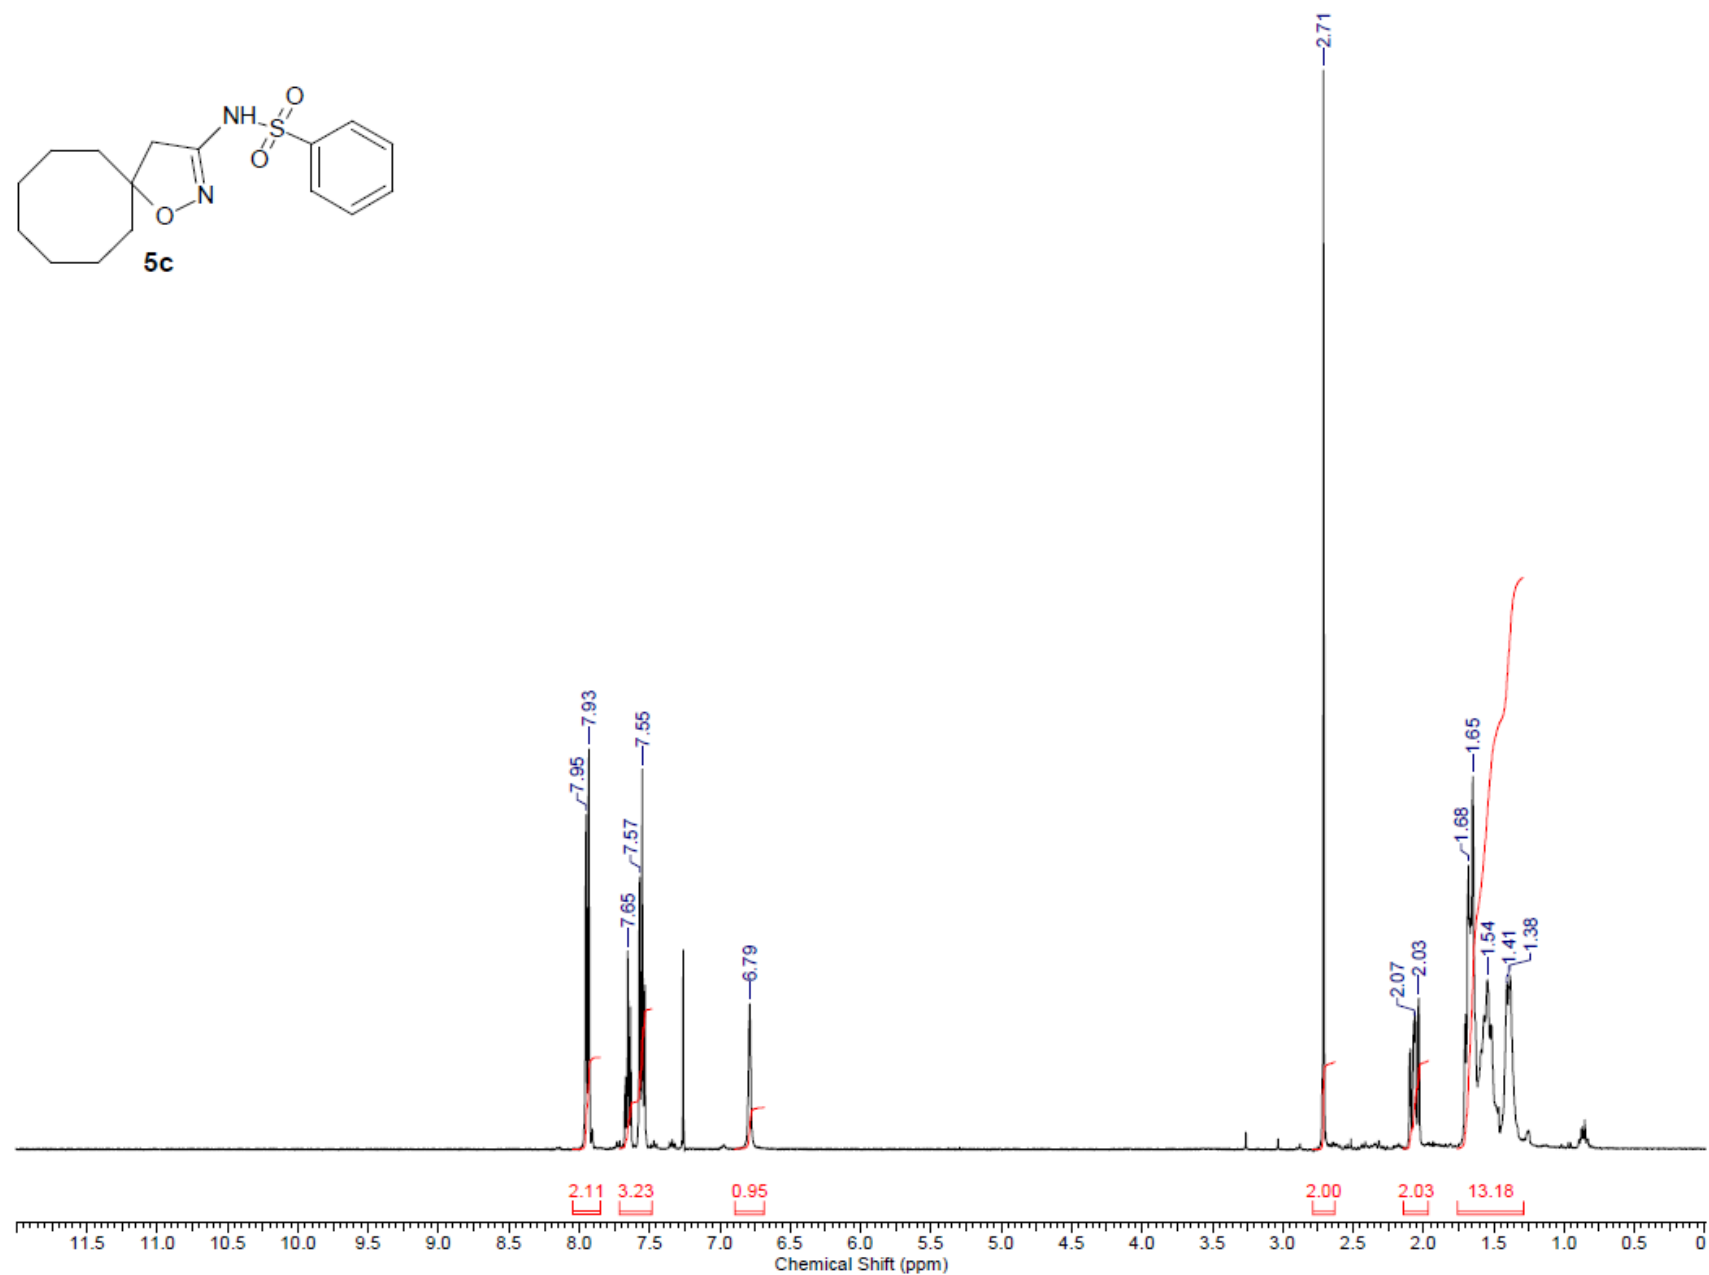

$^{13}\text{C}$  NMR ( $\text{CDCl}_3$ ) spectrum of compound **5c**

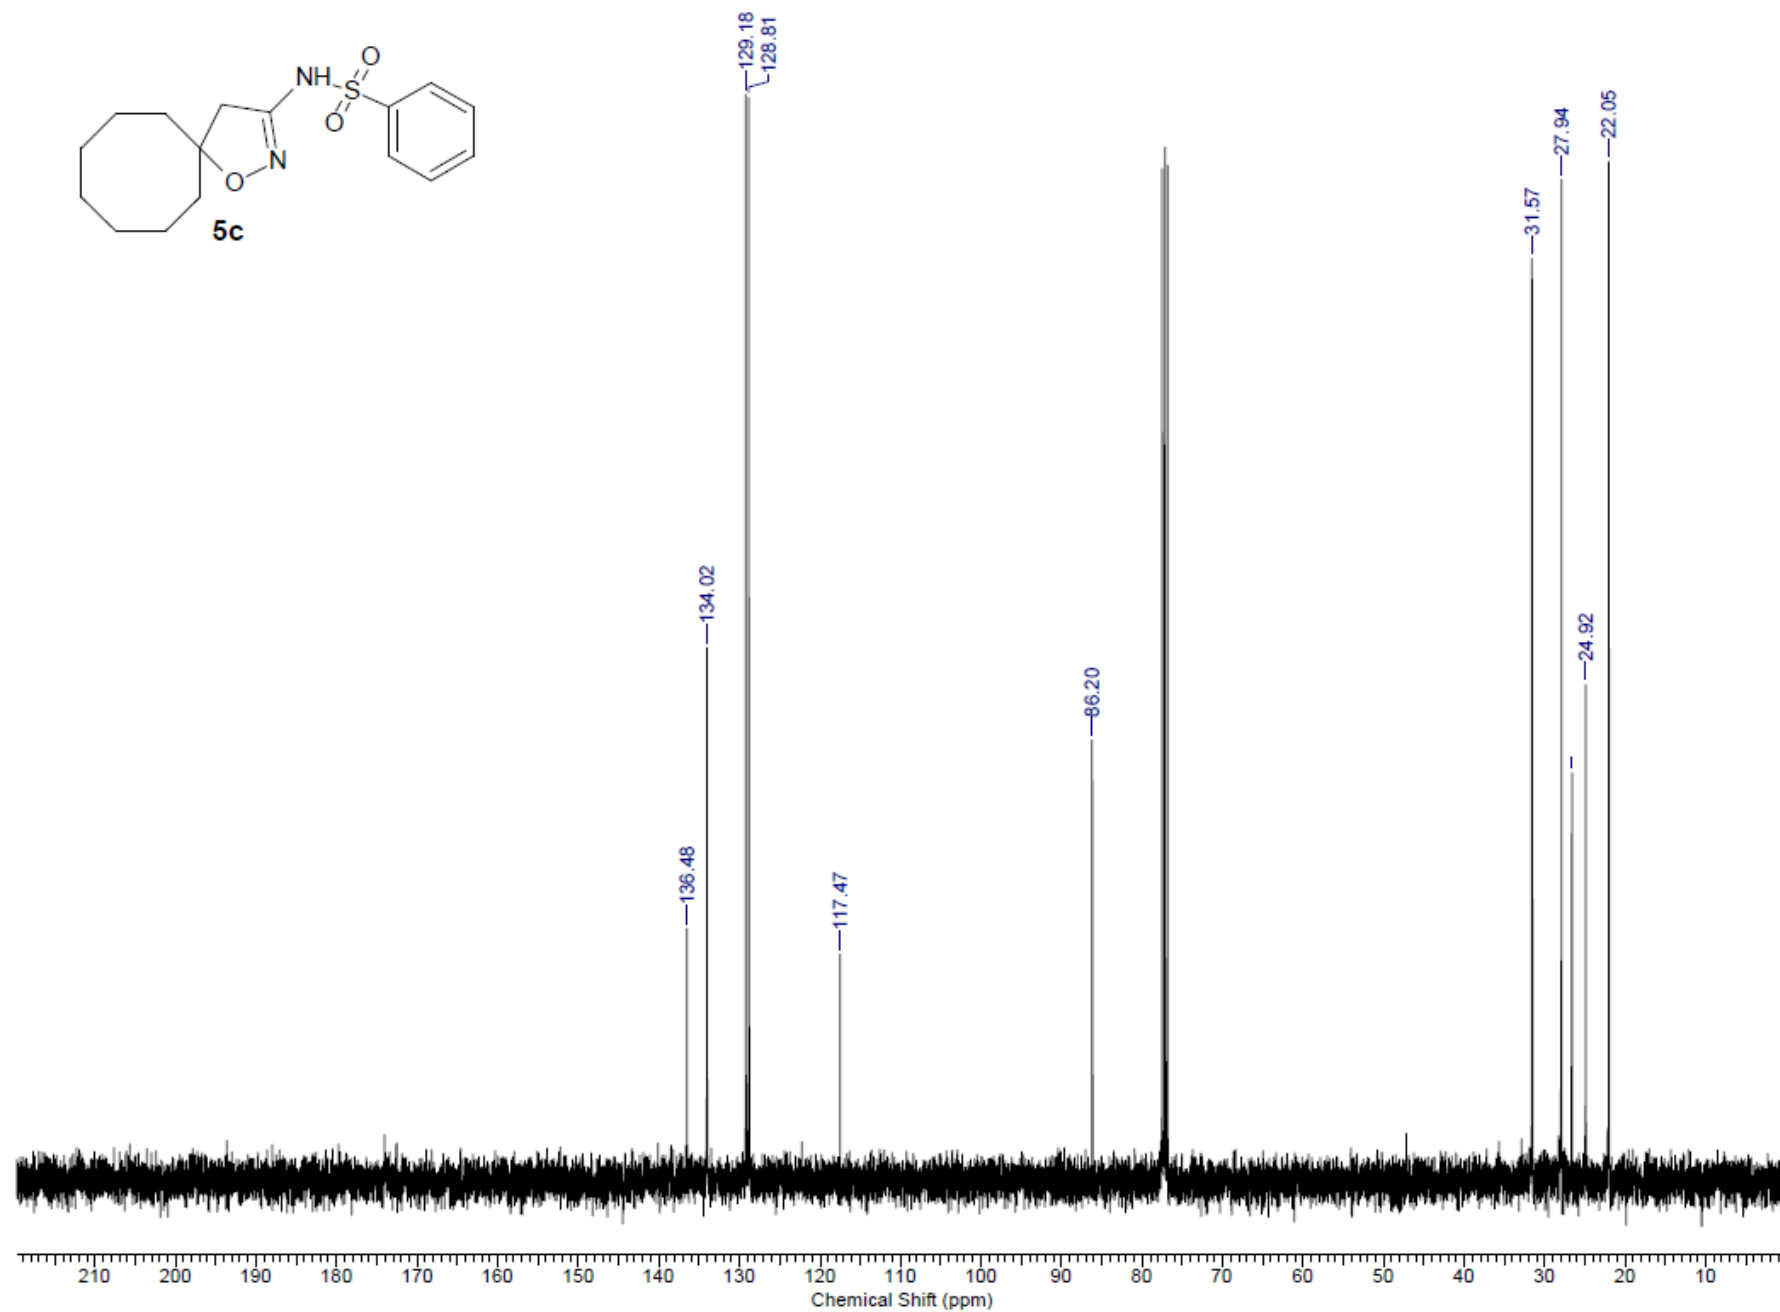

<sup>1</sup>H NMR (CDCl<sub>3</sub>) spectrum of compound **5d**

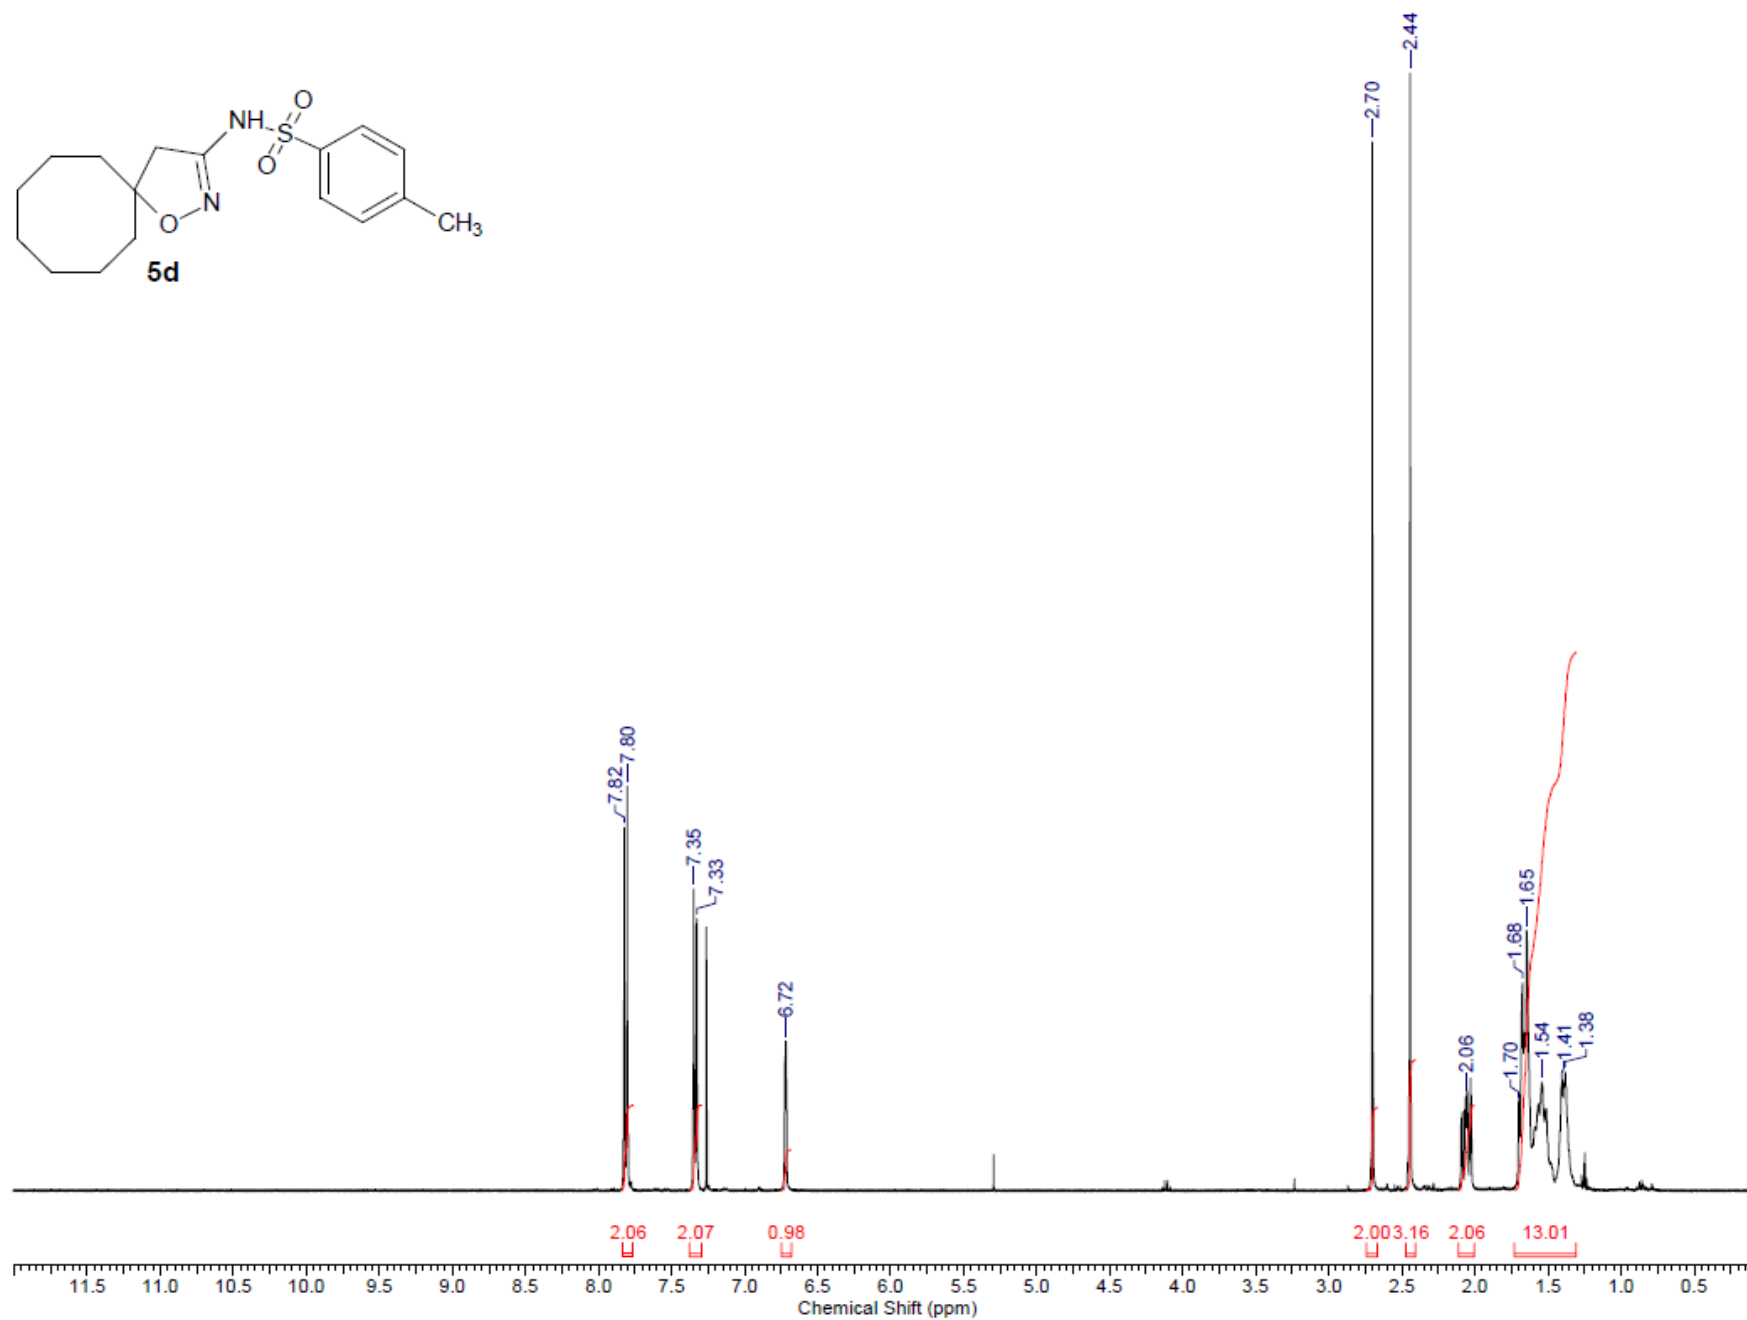

$^{13}\text{C}$  NMR ( $\text{CDCl}_3$ ) spectrum of compound **5d**

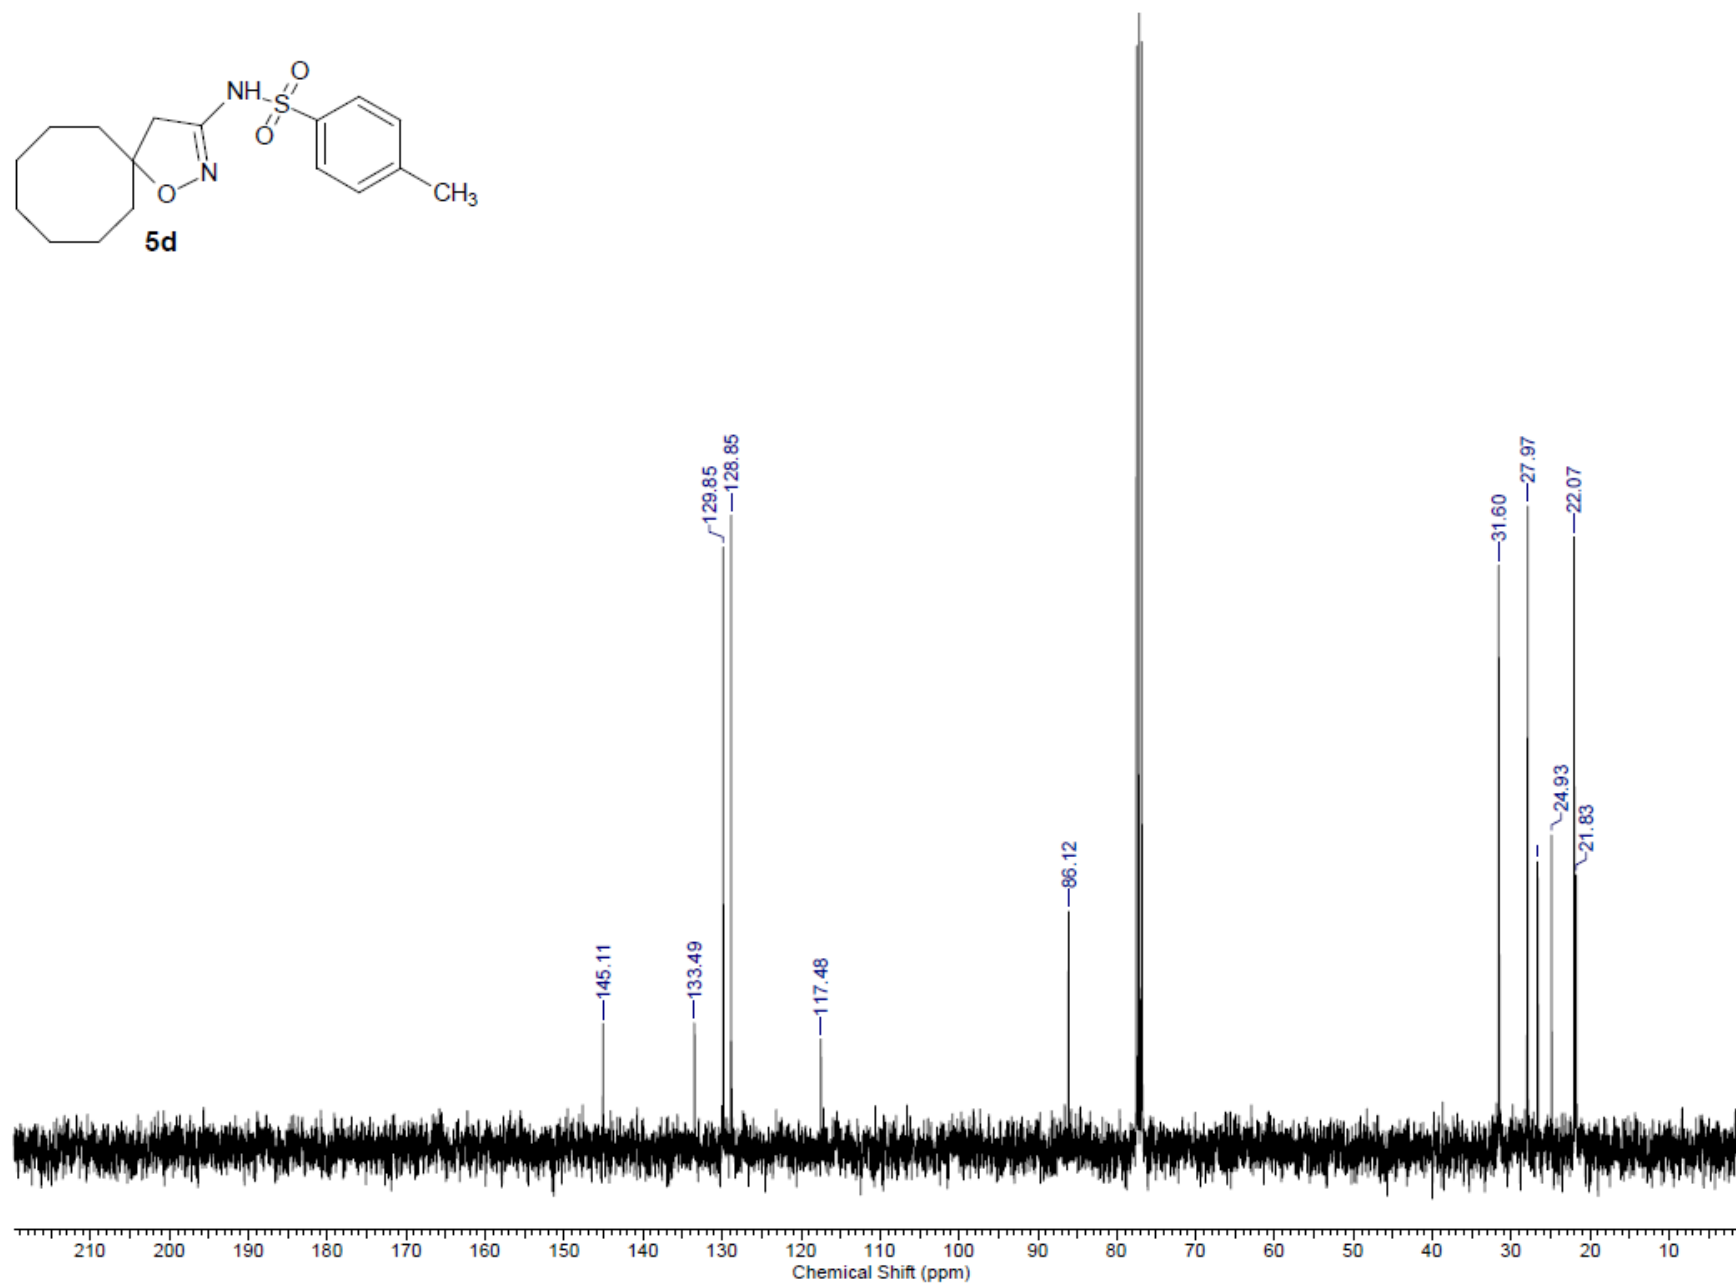



$^1\text{H}$  NMR ( $\text{CDCl}_3$ ) spectrum of compound **5e**

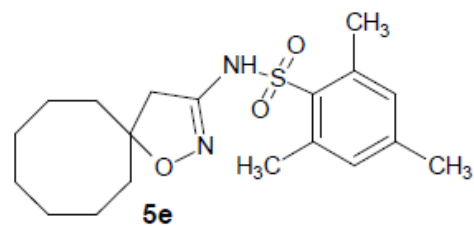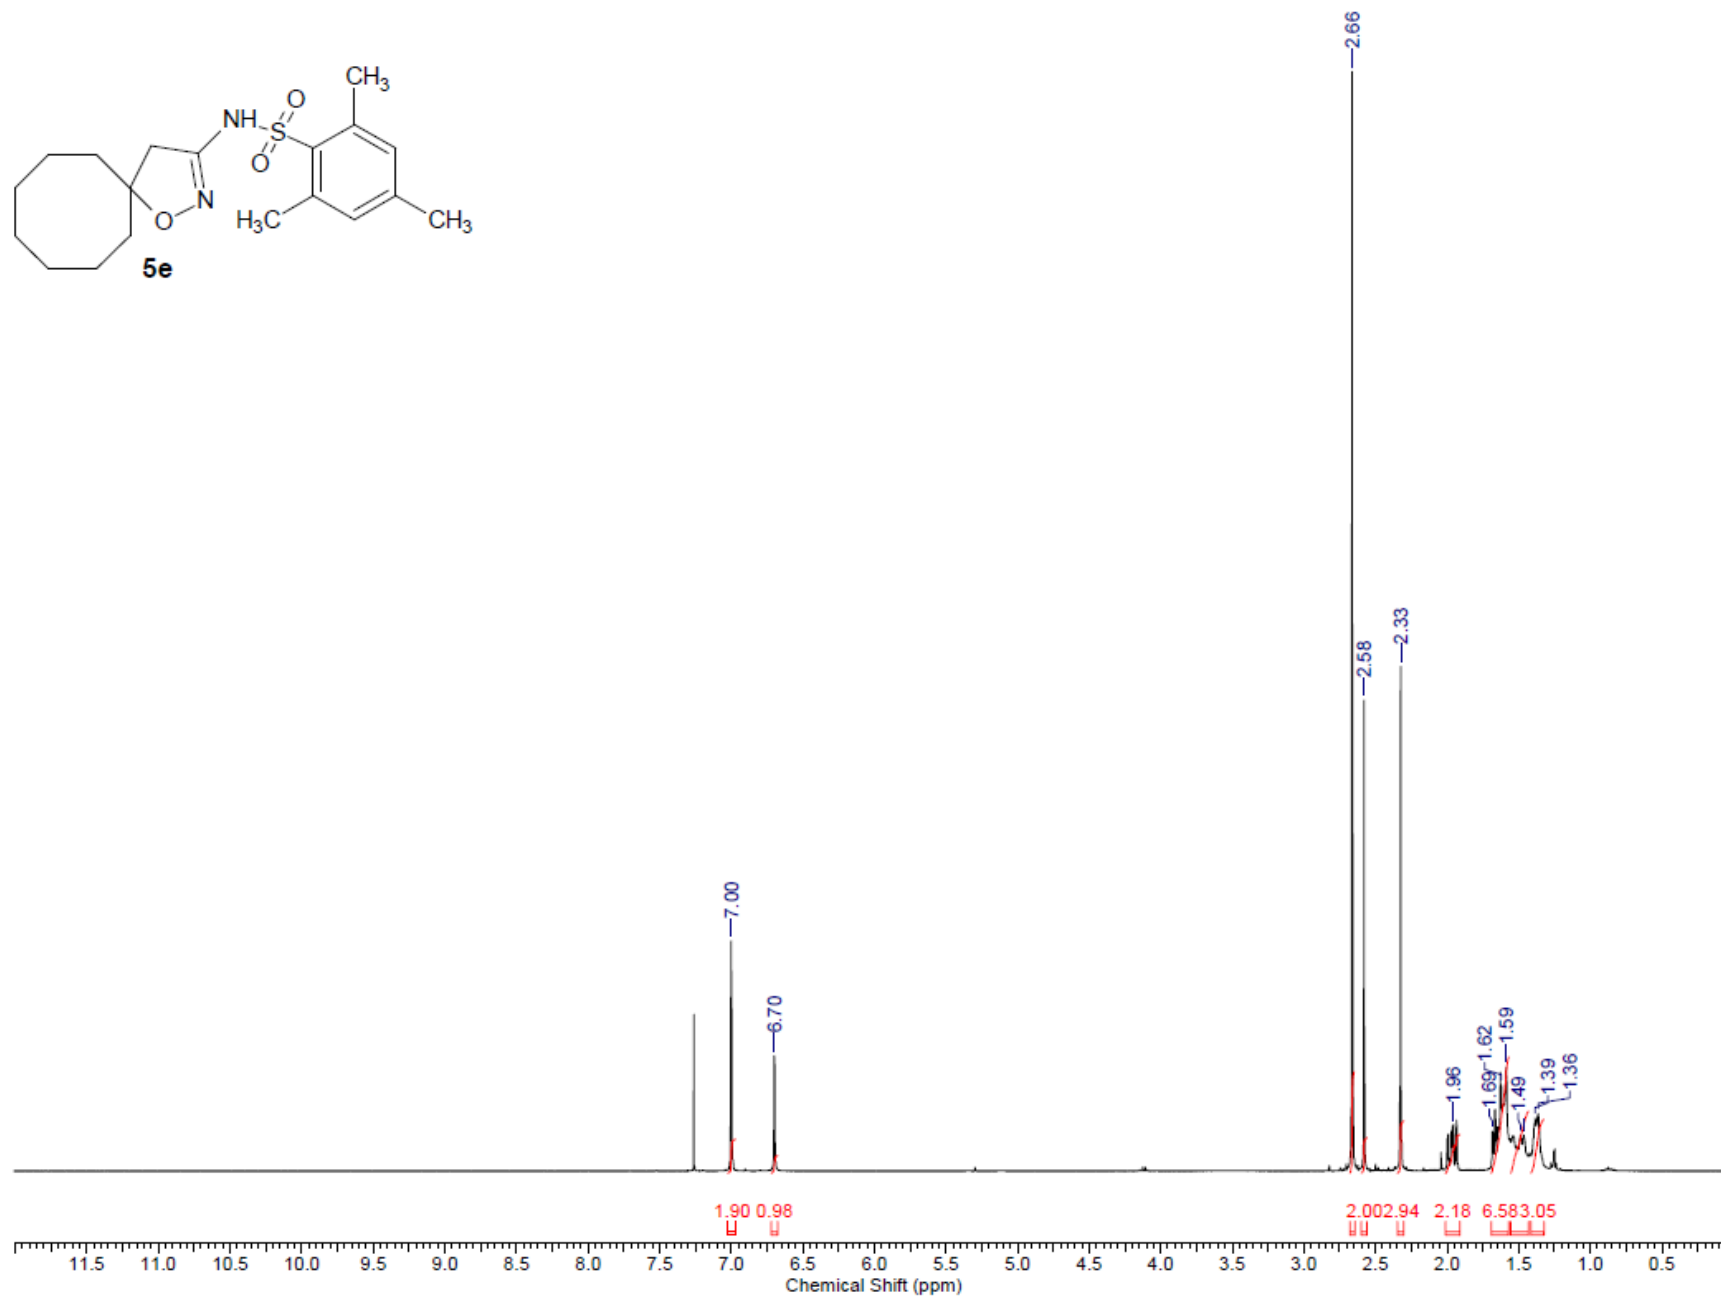

$^{13}\text{C}$  NMR ( $\text{CDCl}_3$ ) spectrum of compound **5e**

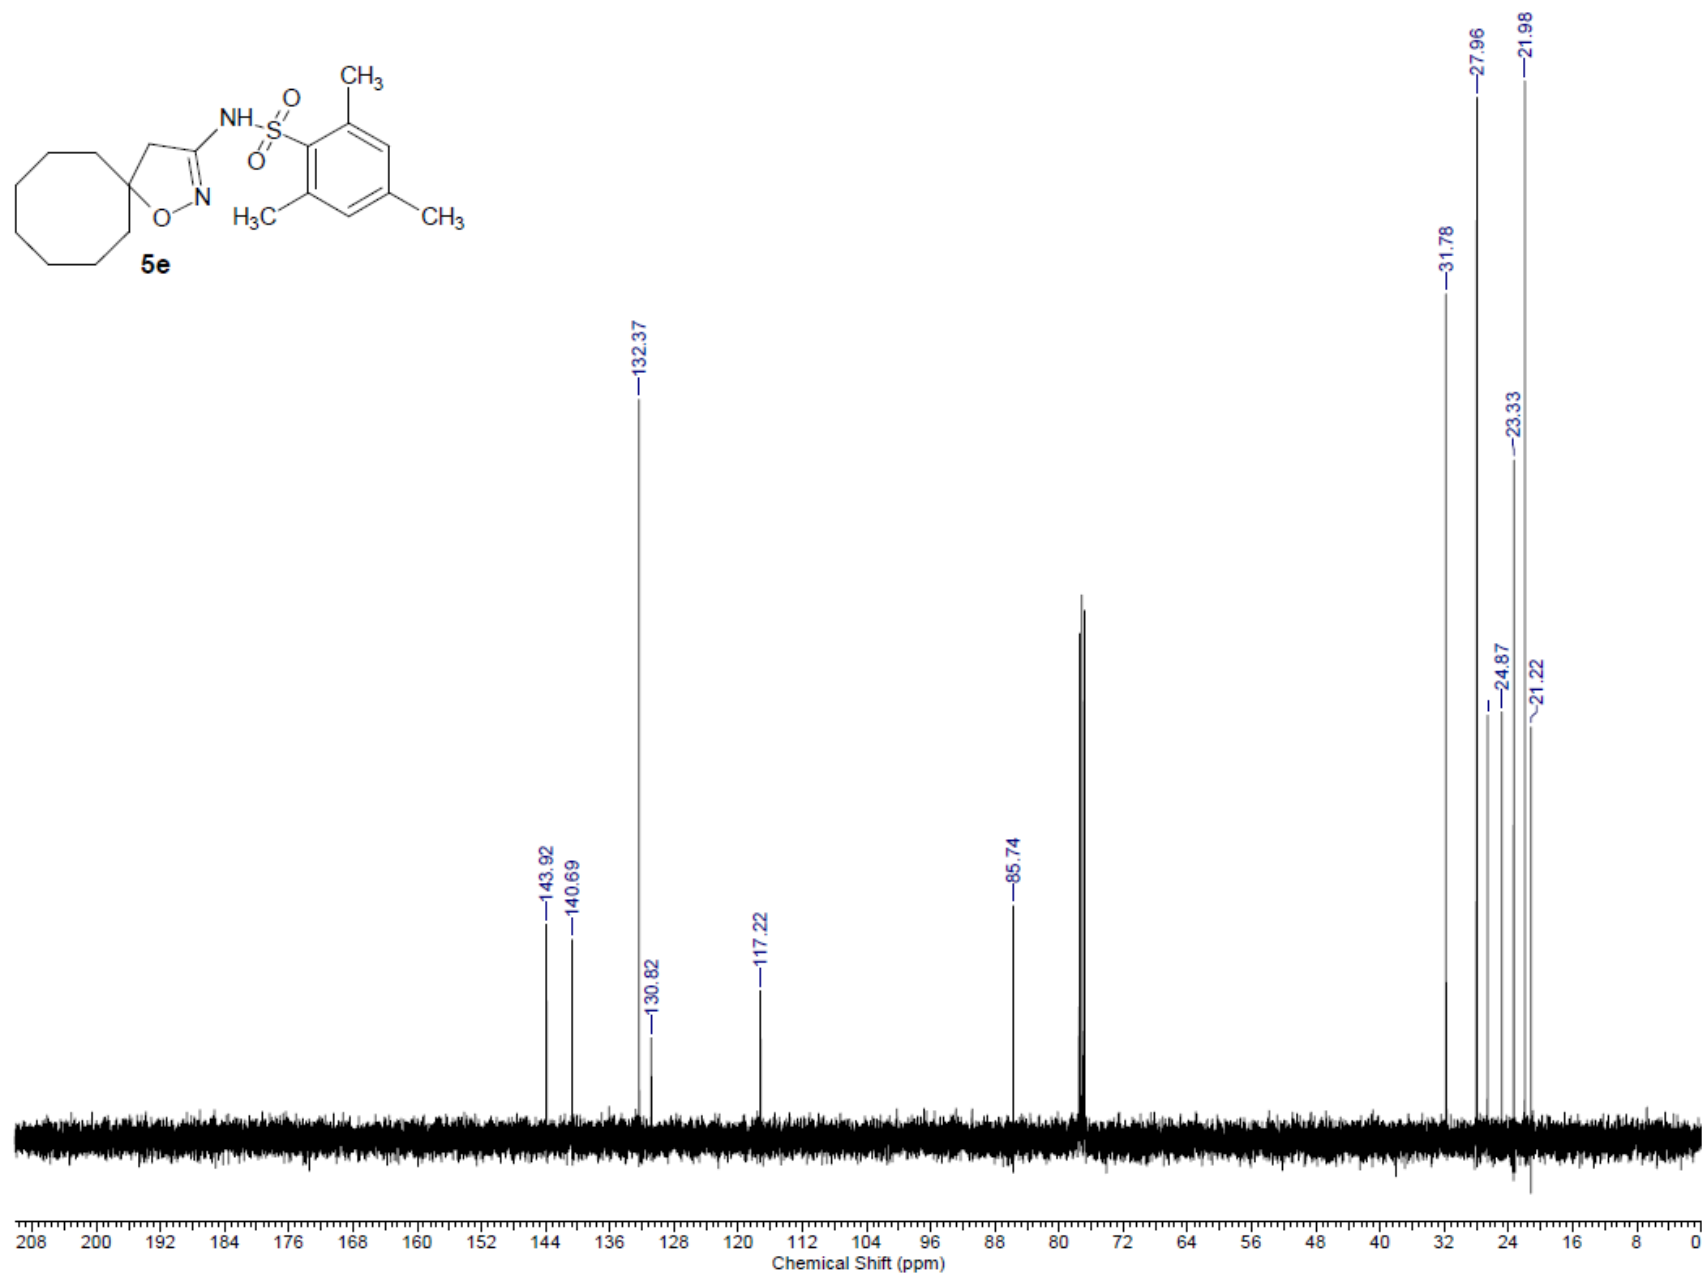

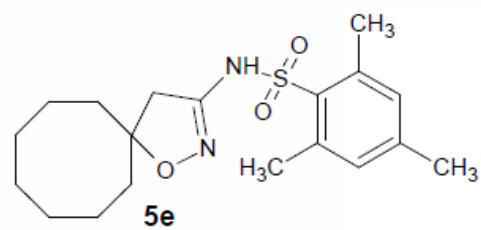

HSQC NMR (CDCl<sub>3</sub>) spectrum of compound **5e**

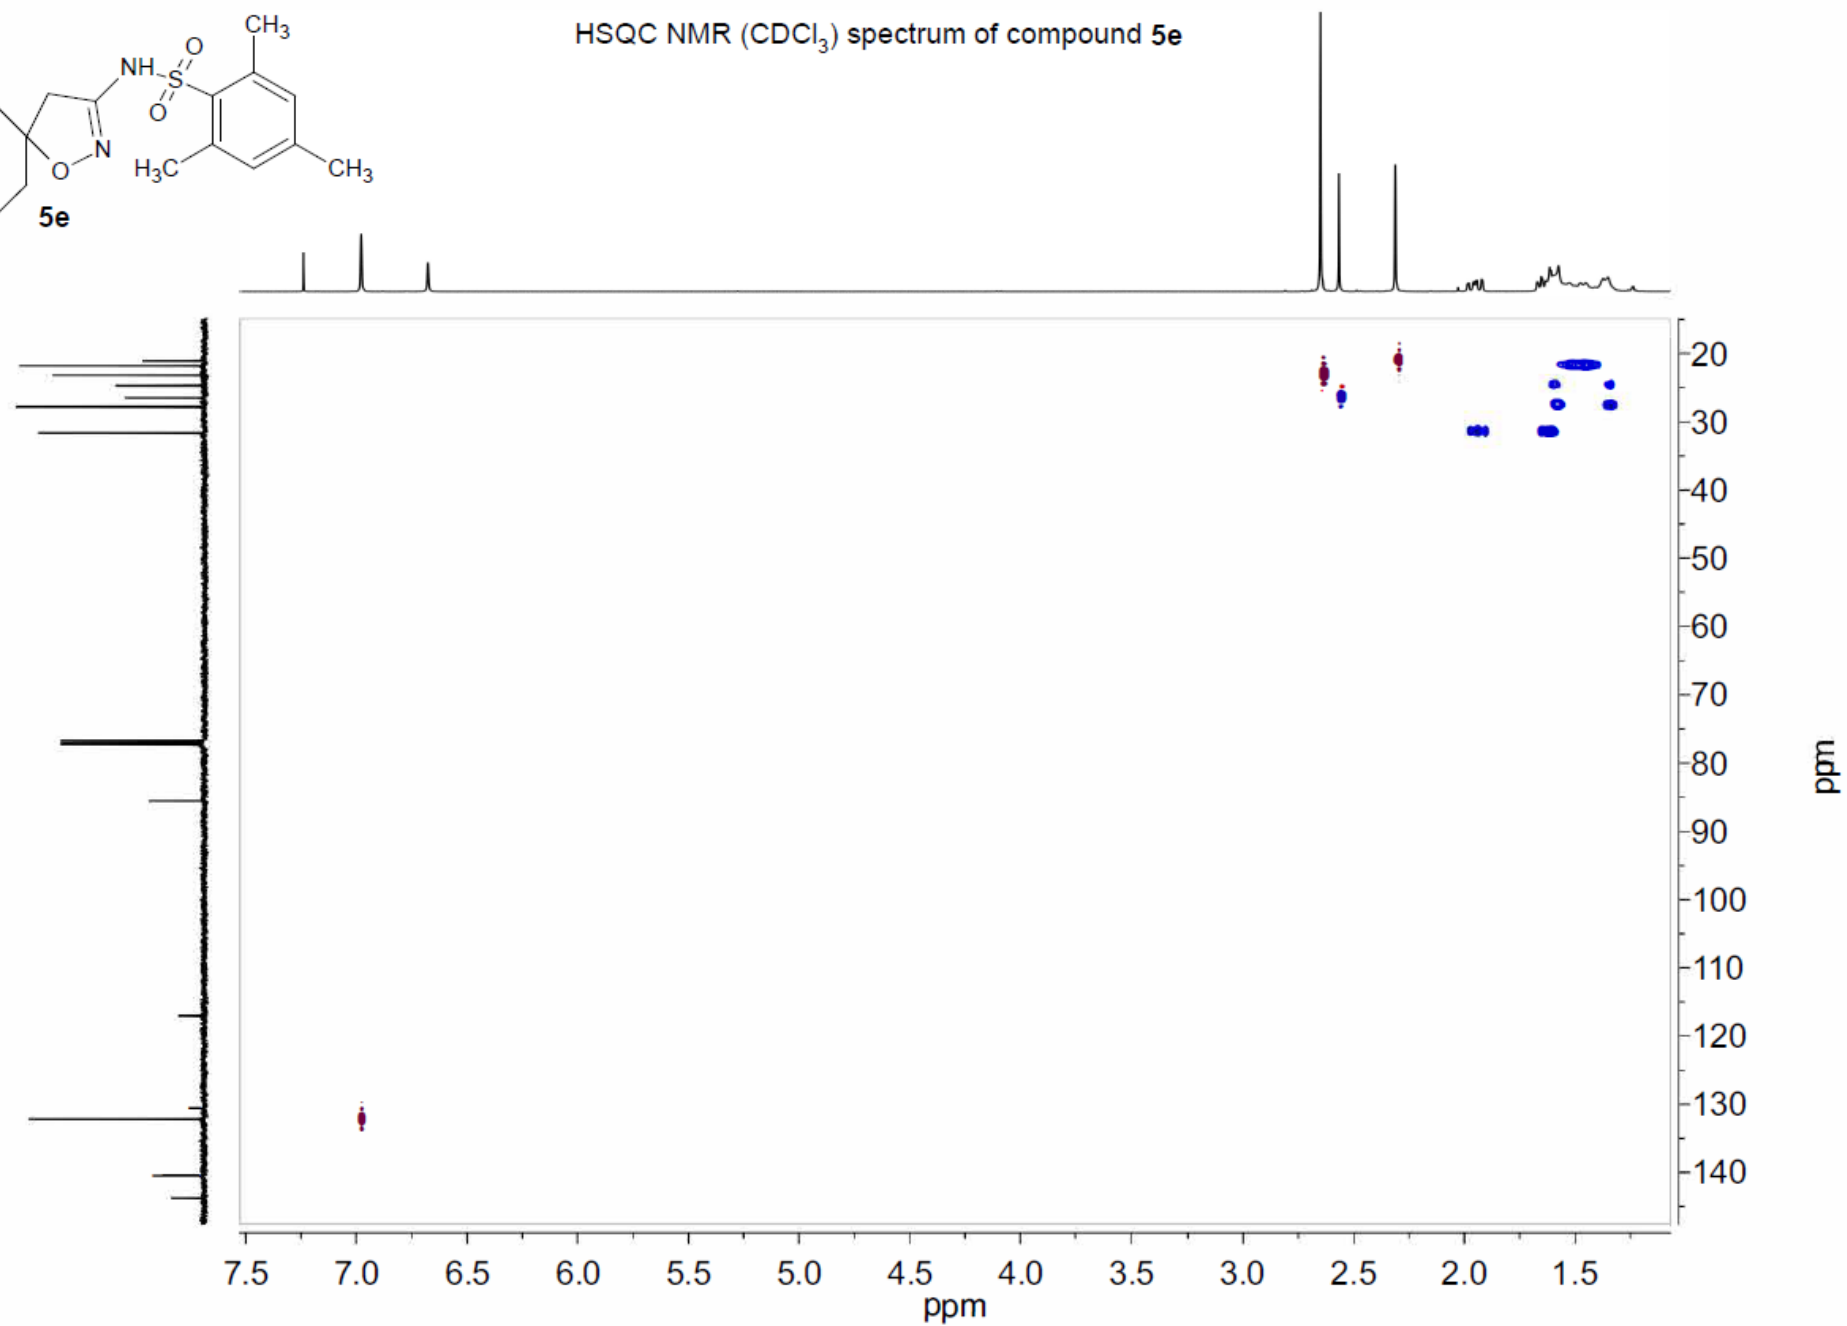

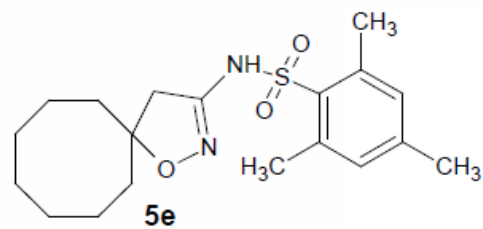

HMBC NMR (CDCl<sub>3</sub>) spectrum of compound **5e**

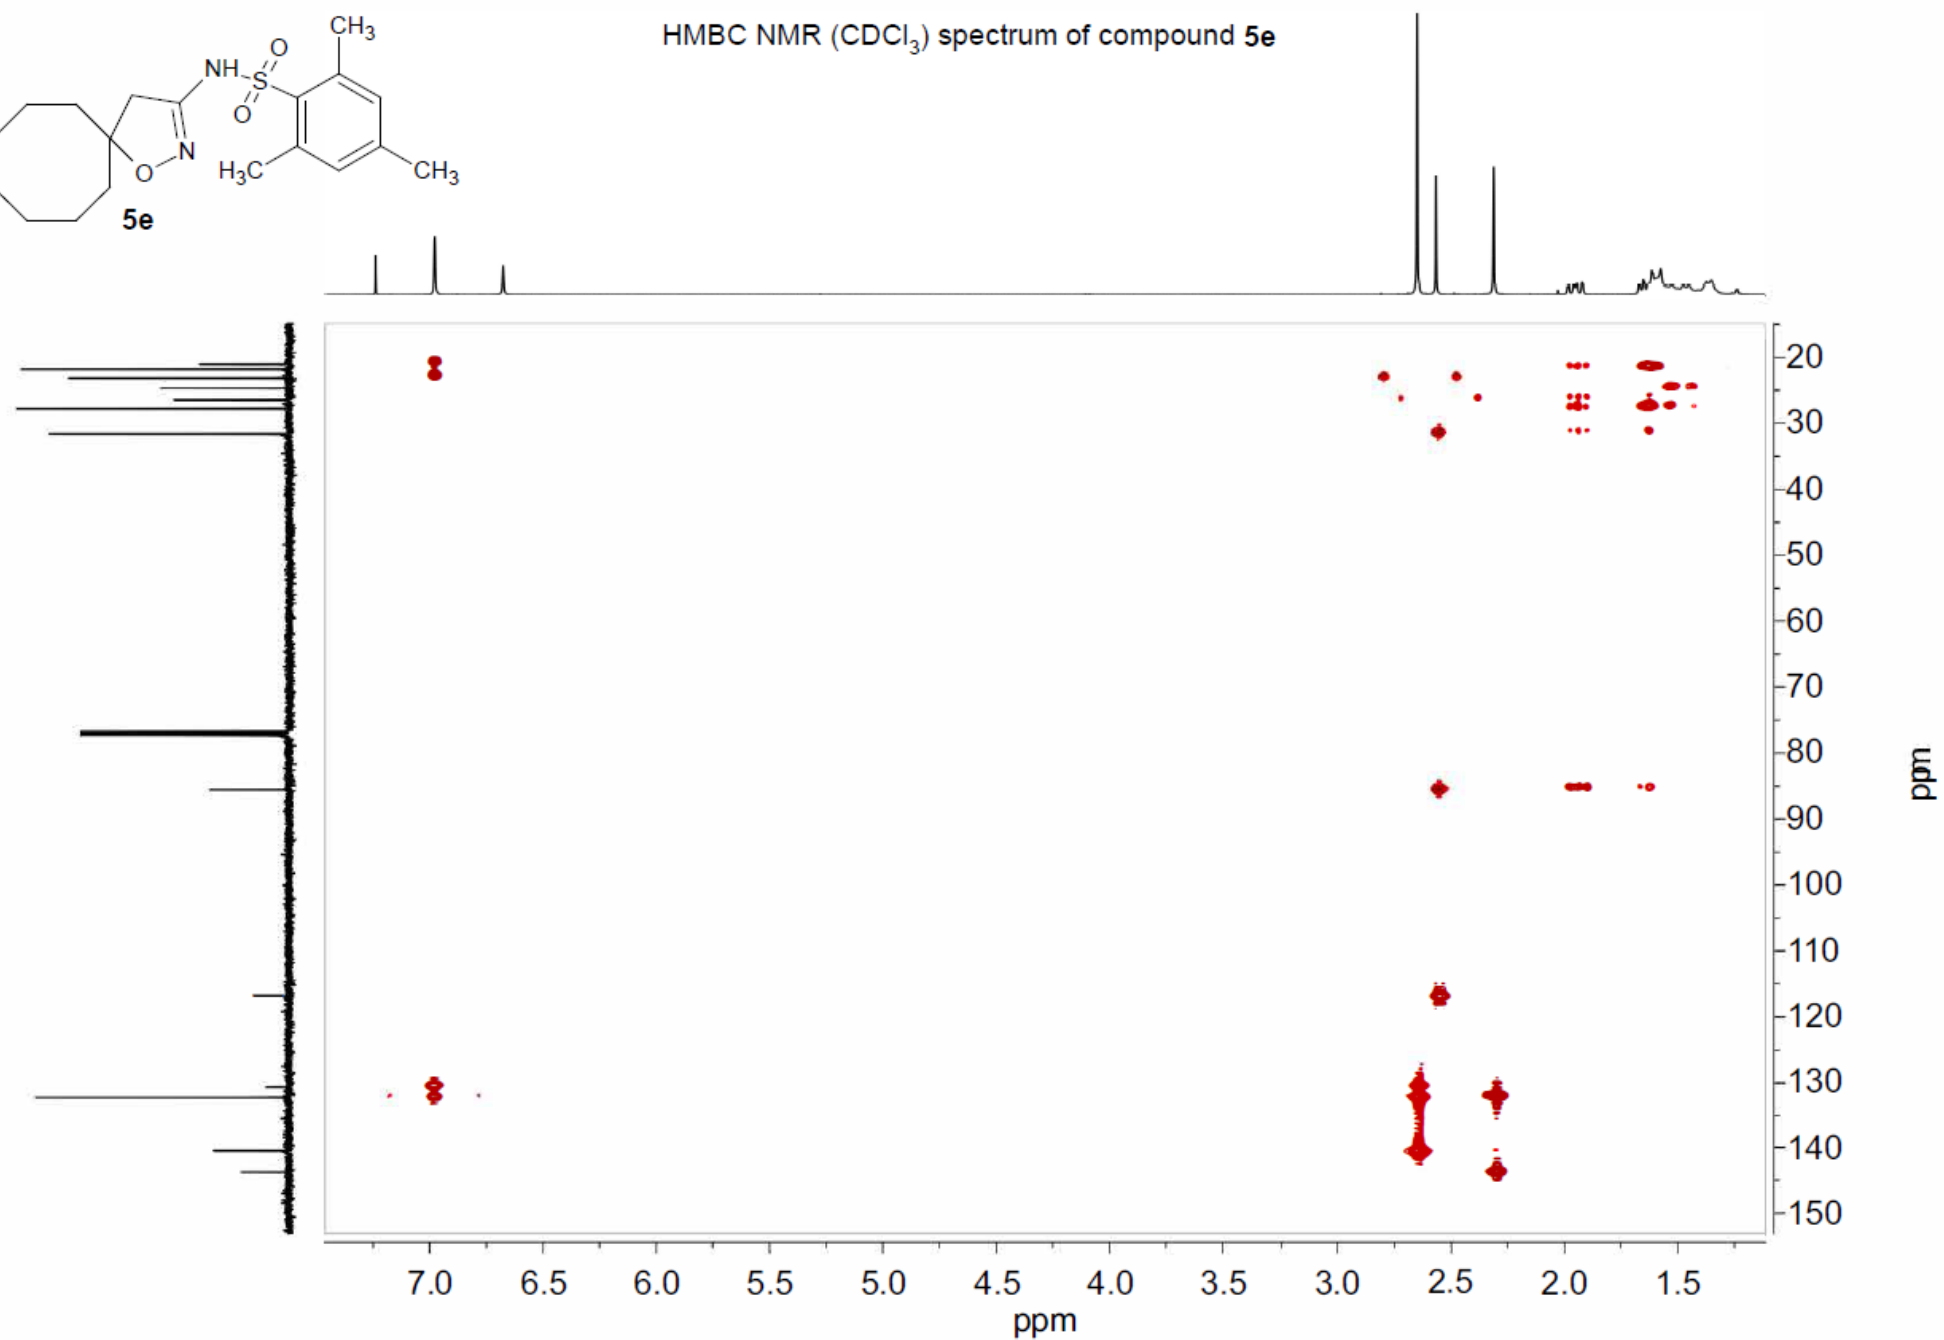

$^1\text{H}$  NMR ( $\text{CDCl}_3$ ) spectrum of compound **5f**

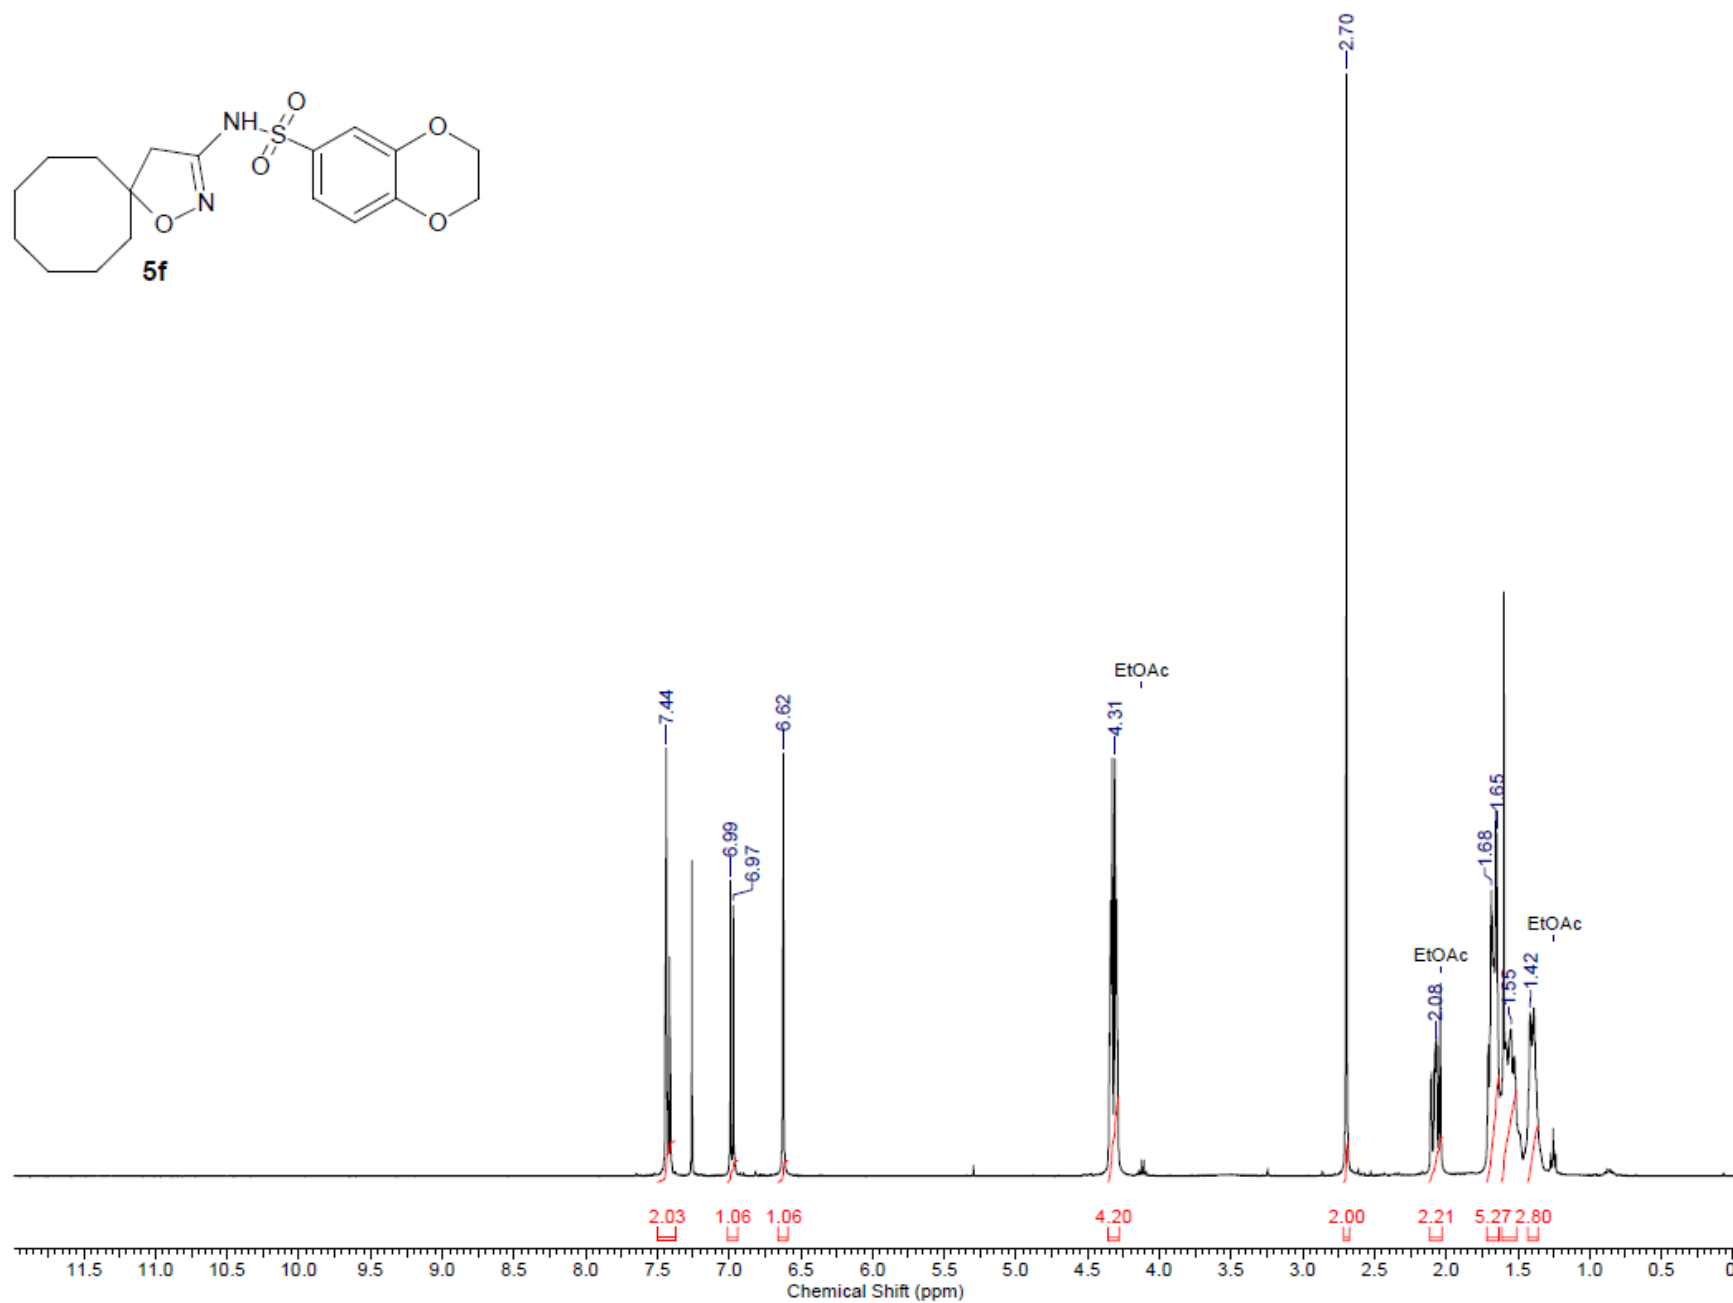

$^{13}\text{C}$  NMR ( $\text{CDCl}_3$ ) spectrum of compound **5f**

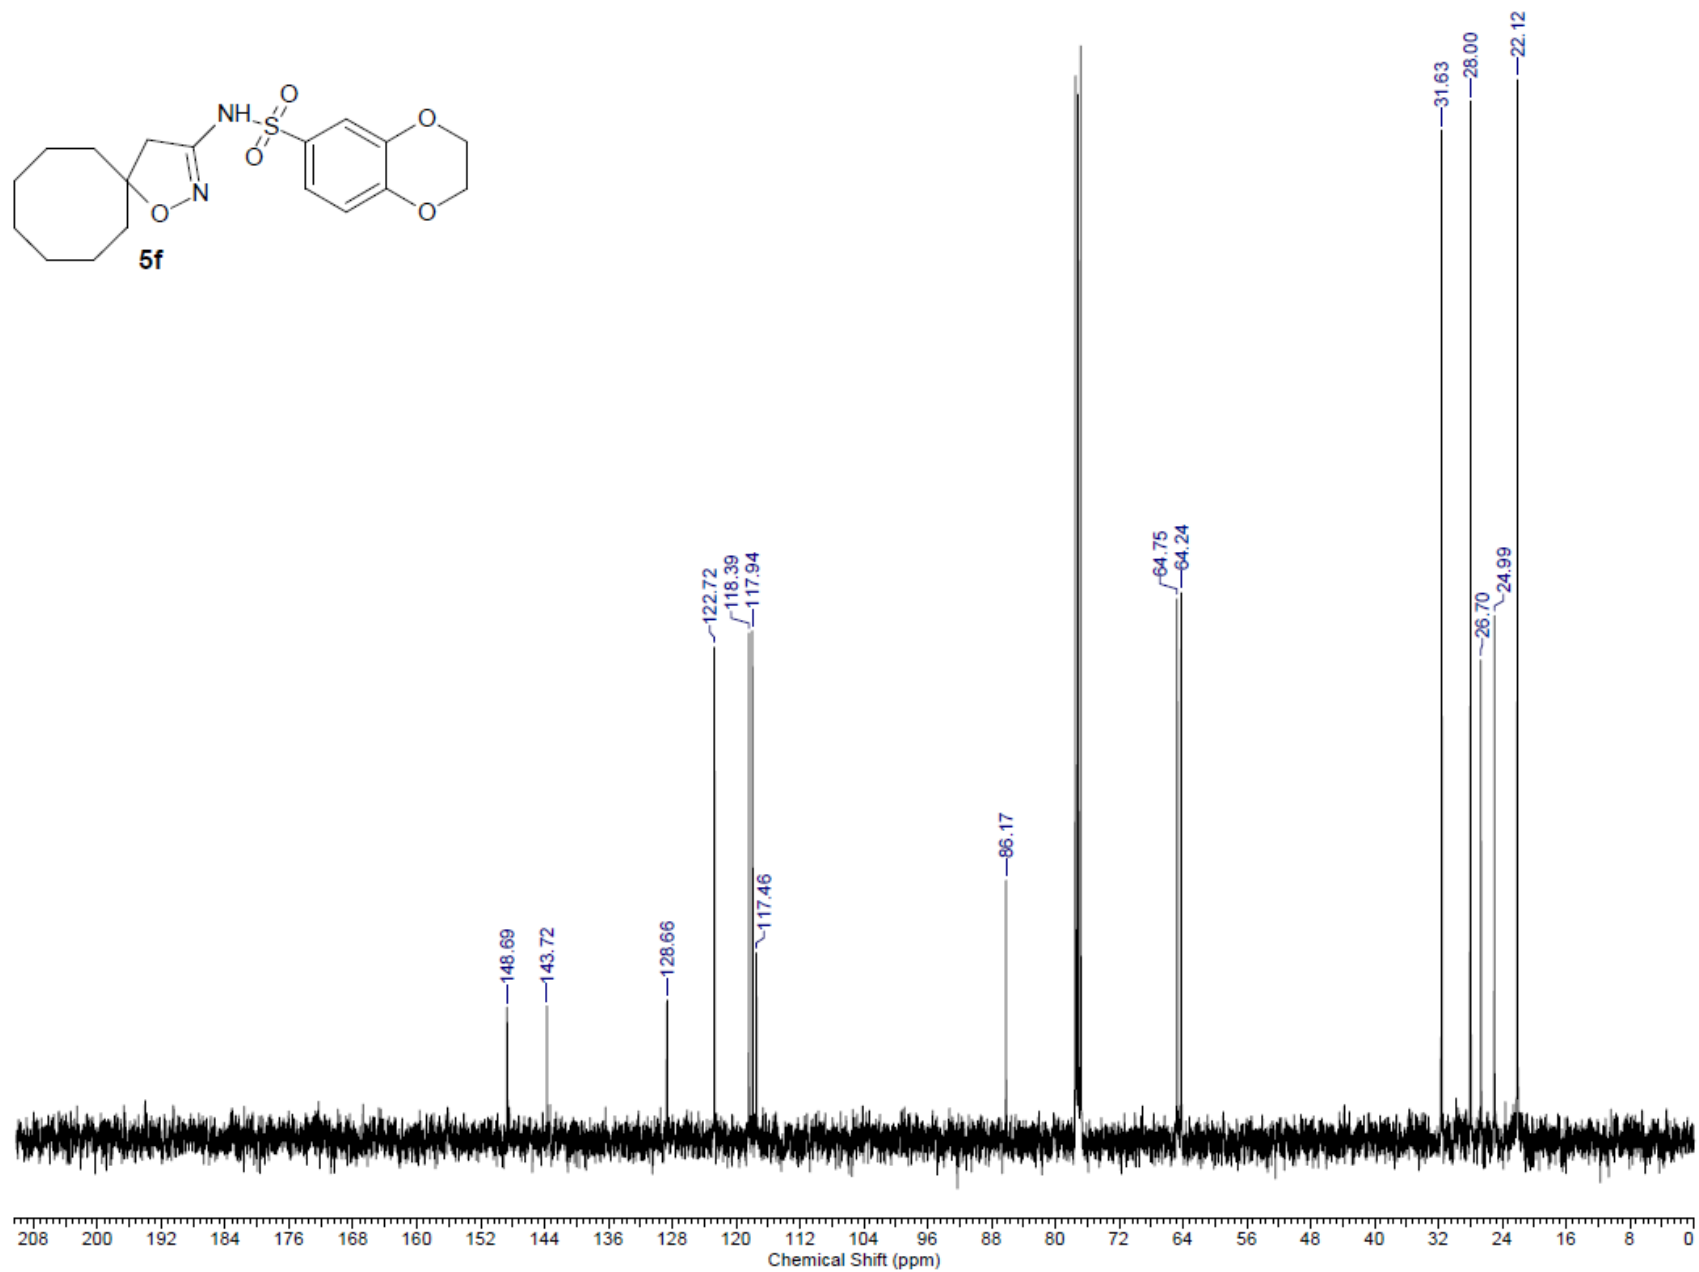

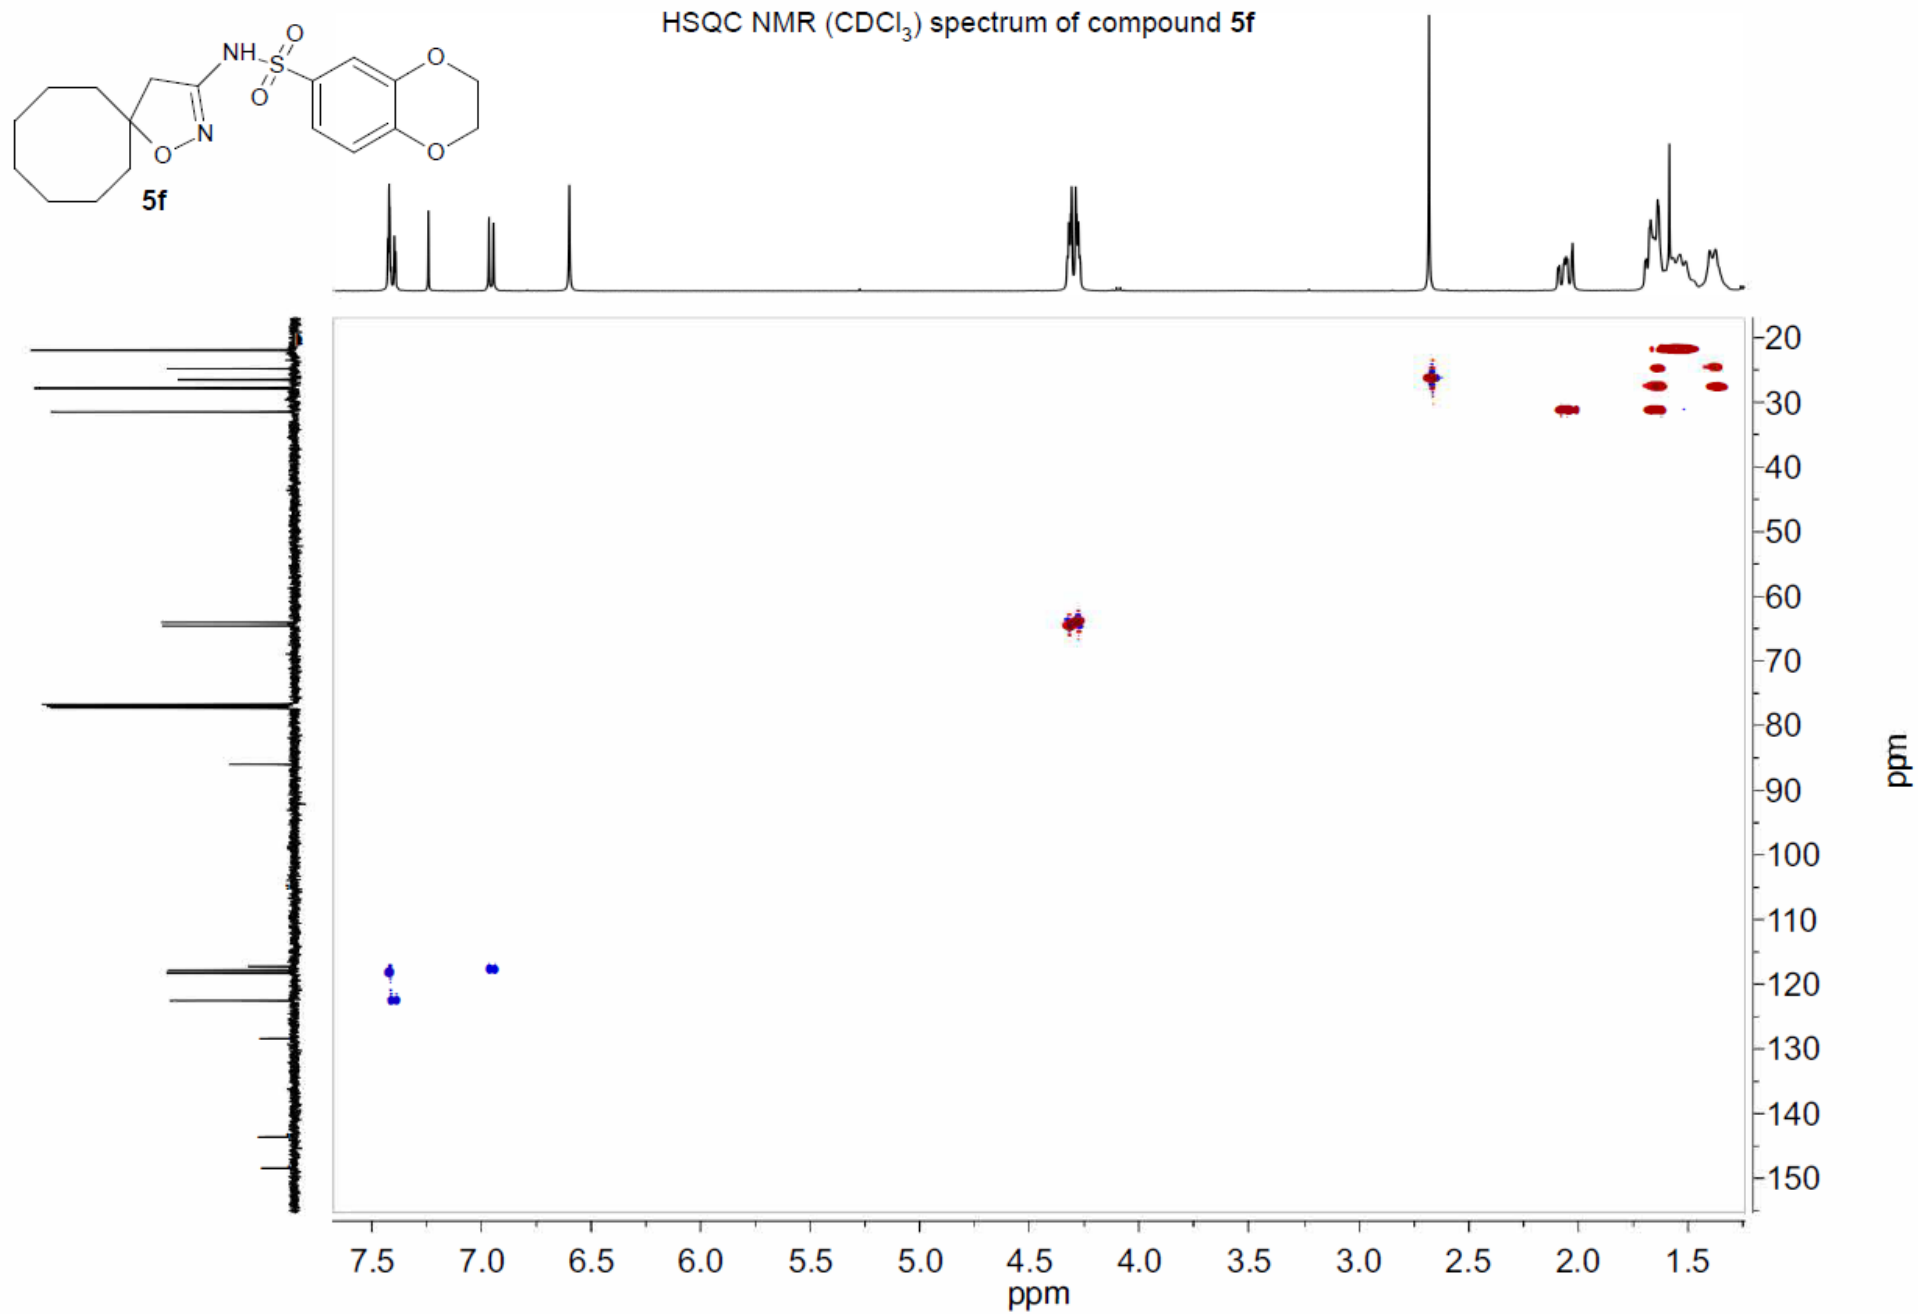

HMBC NMR (CDCl<sub>3</sub>) spectrum of compound 5f

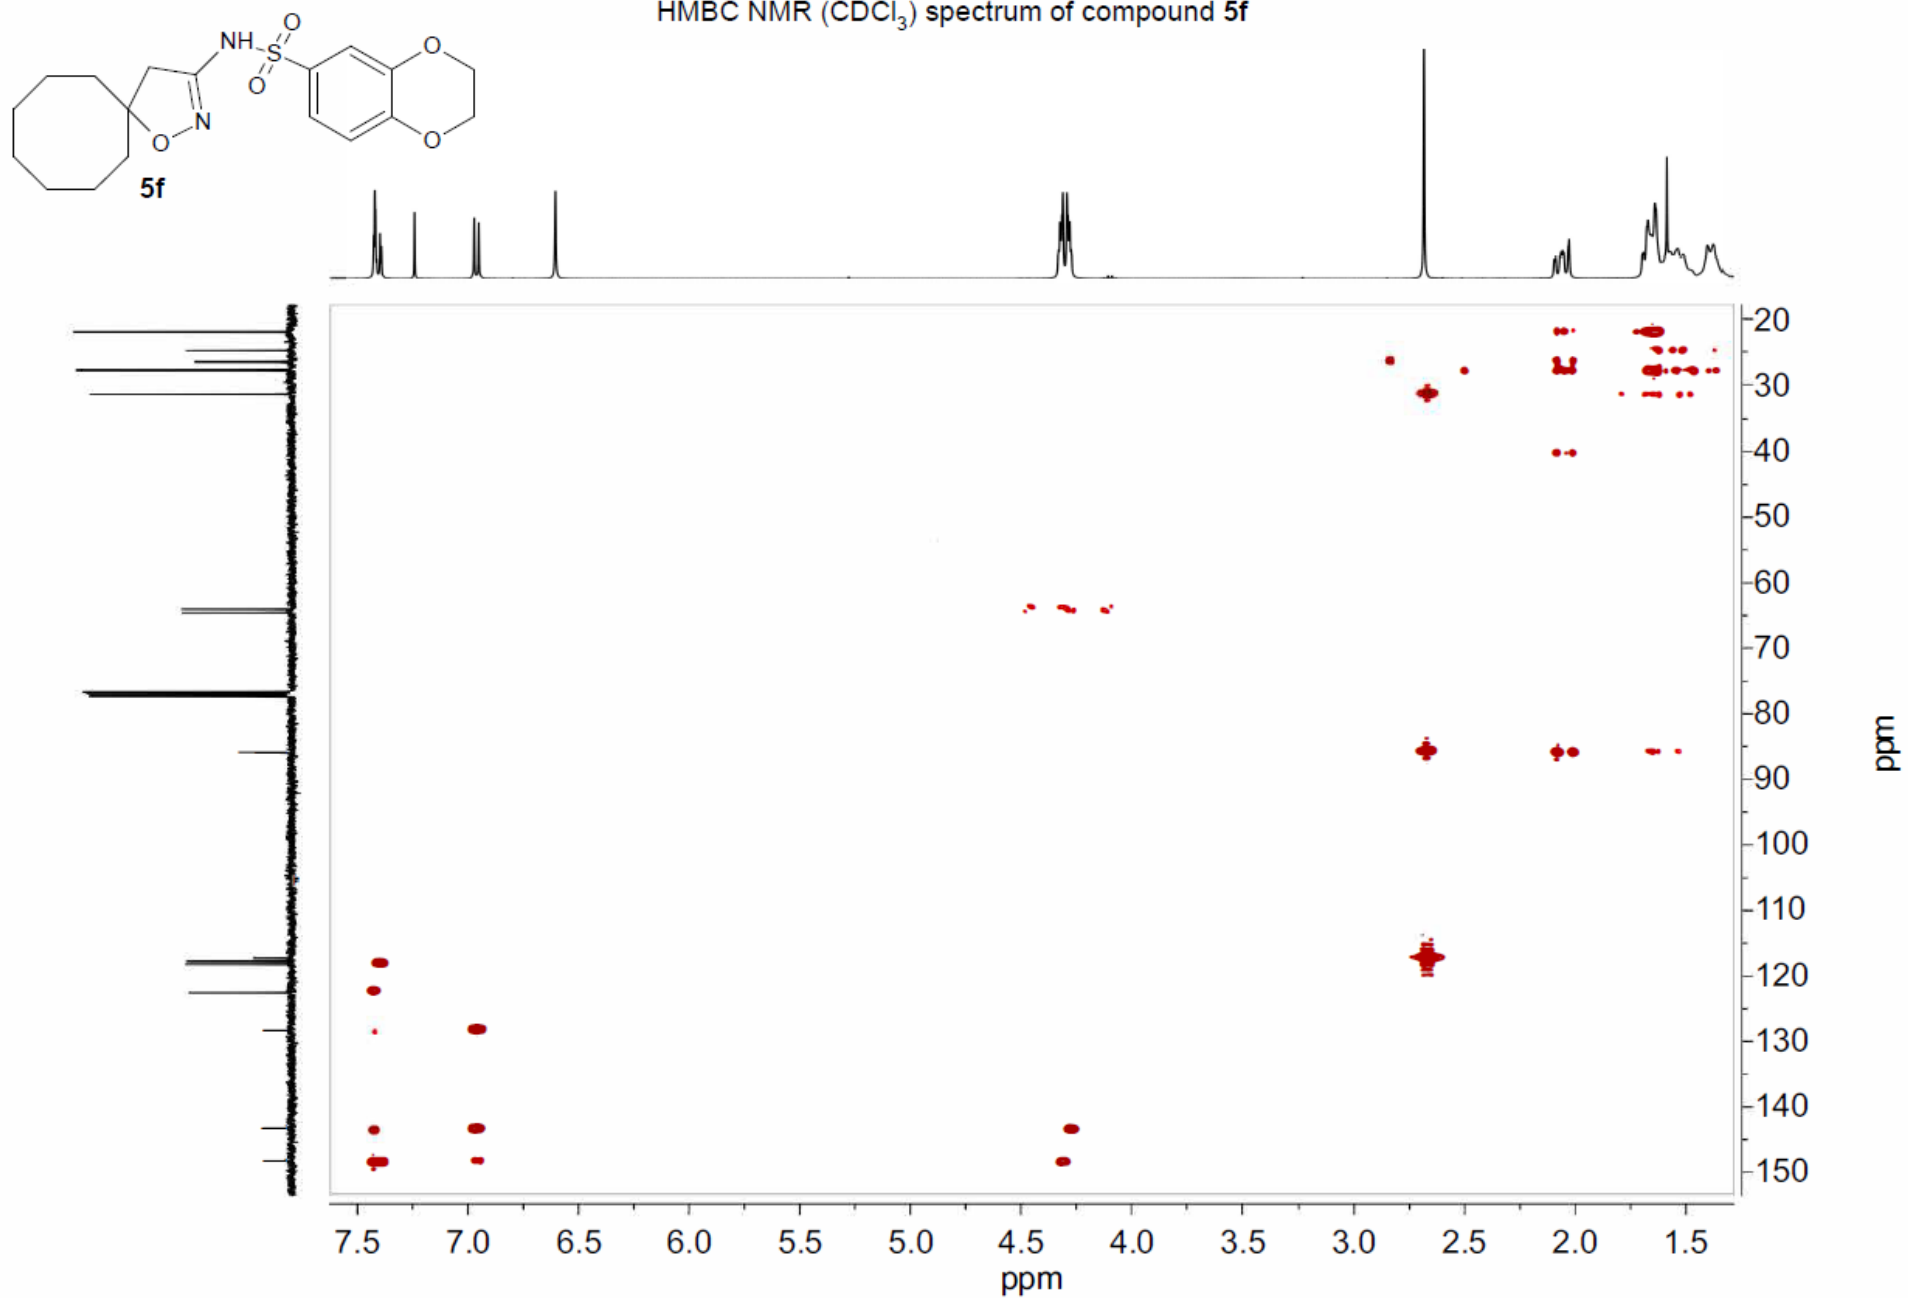



<sup>1</sup>H NMR (CD<sub>3</sub>OD) spectrum of compound **5g**

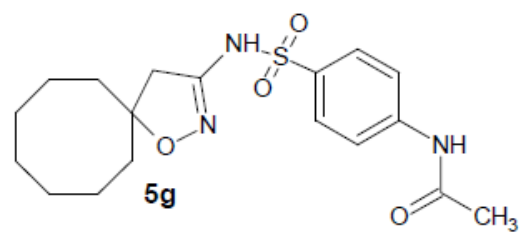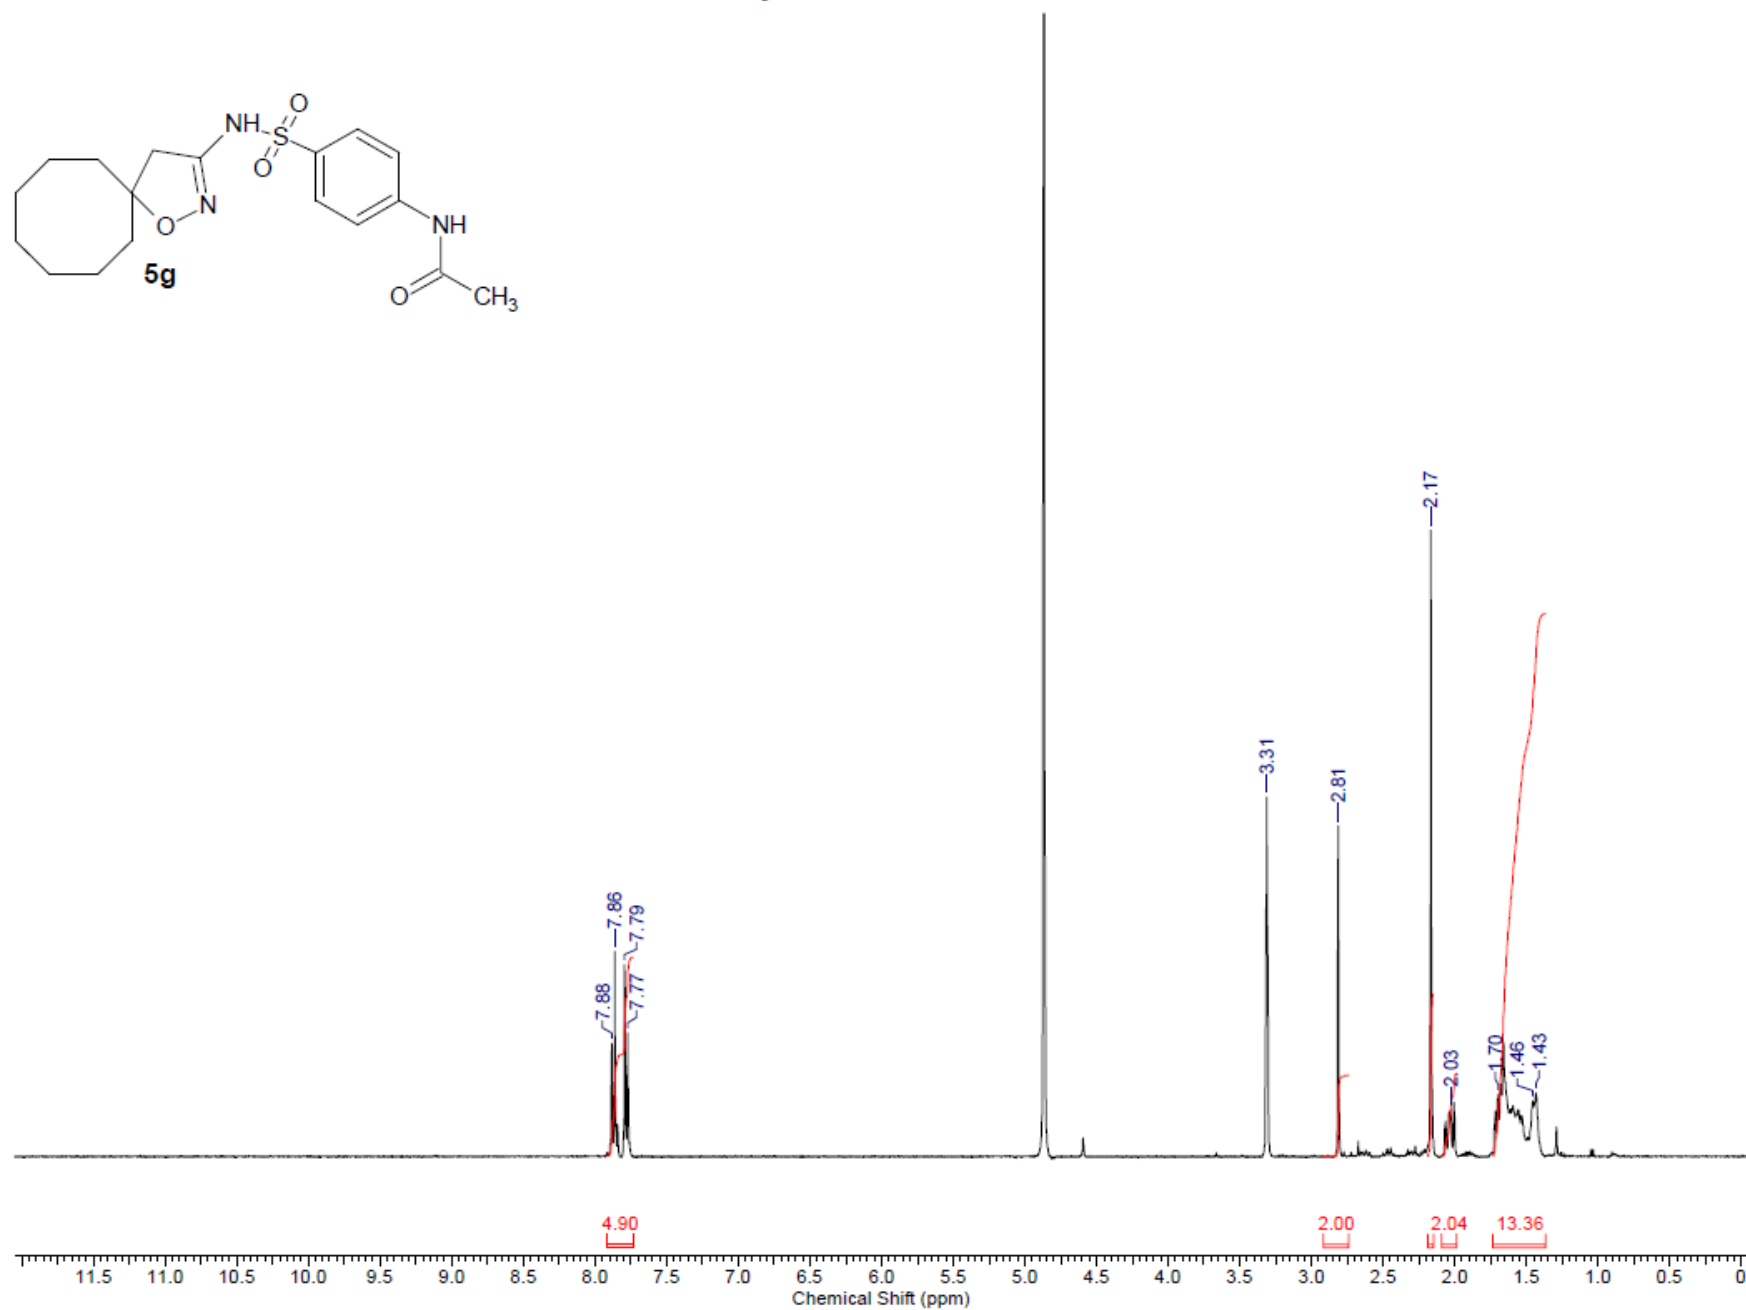

$^{13}\text{C}$  NMR ( $\text{CD}_3\text{OD}$ ) spectrum of compound **5g**

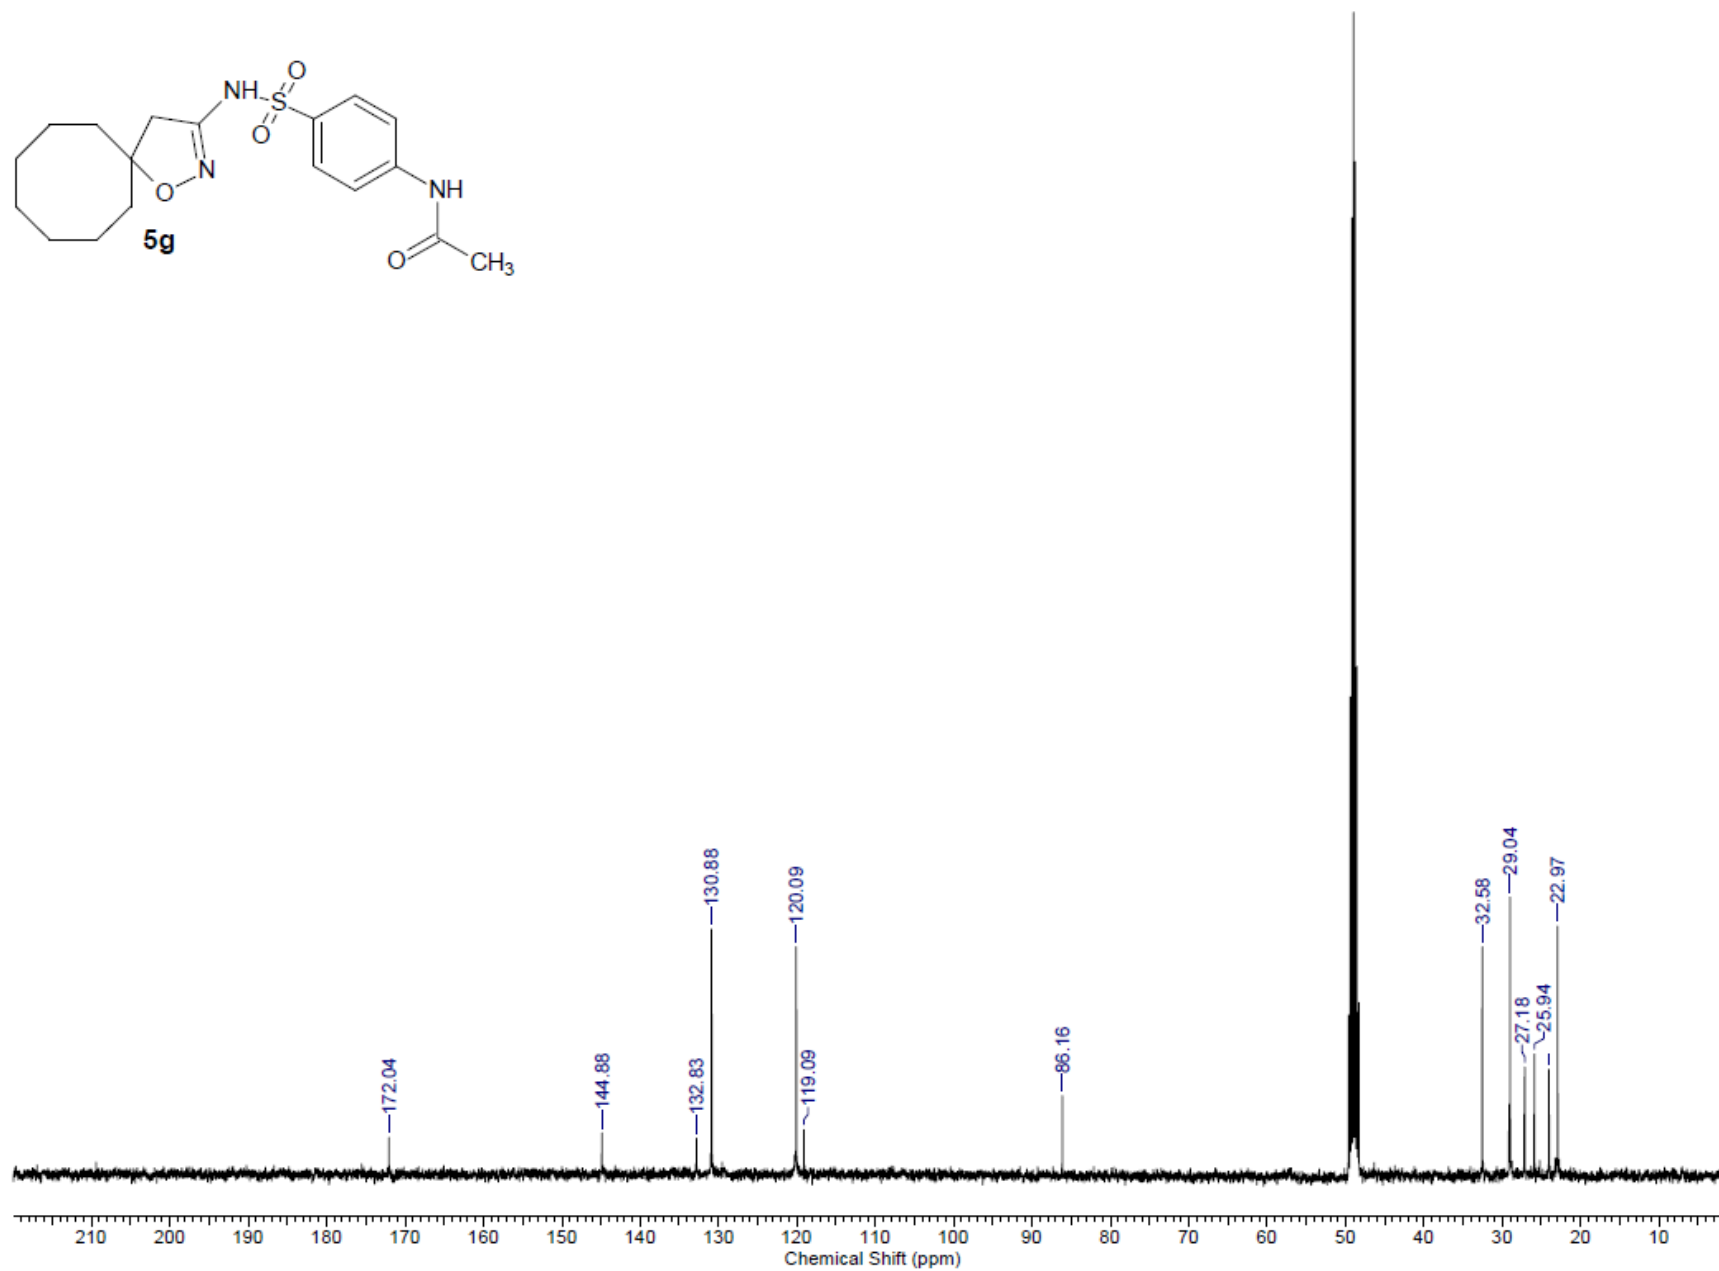

HSQC NMR (CD<sub>3</sub>OD) spectrum of compound 5g

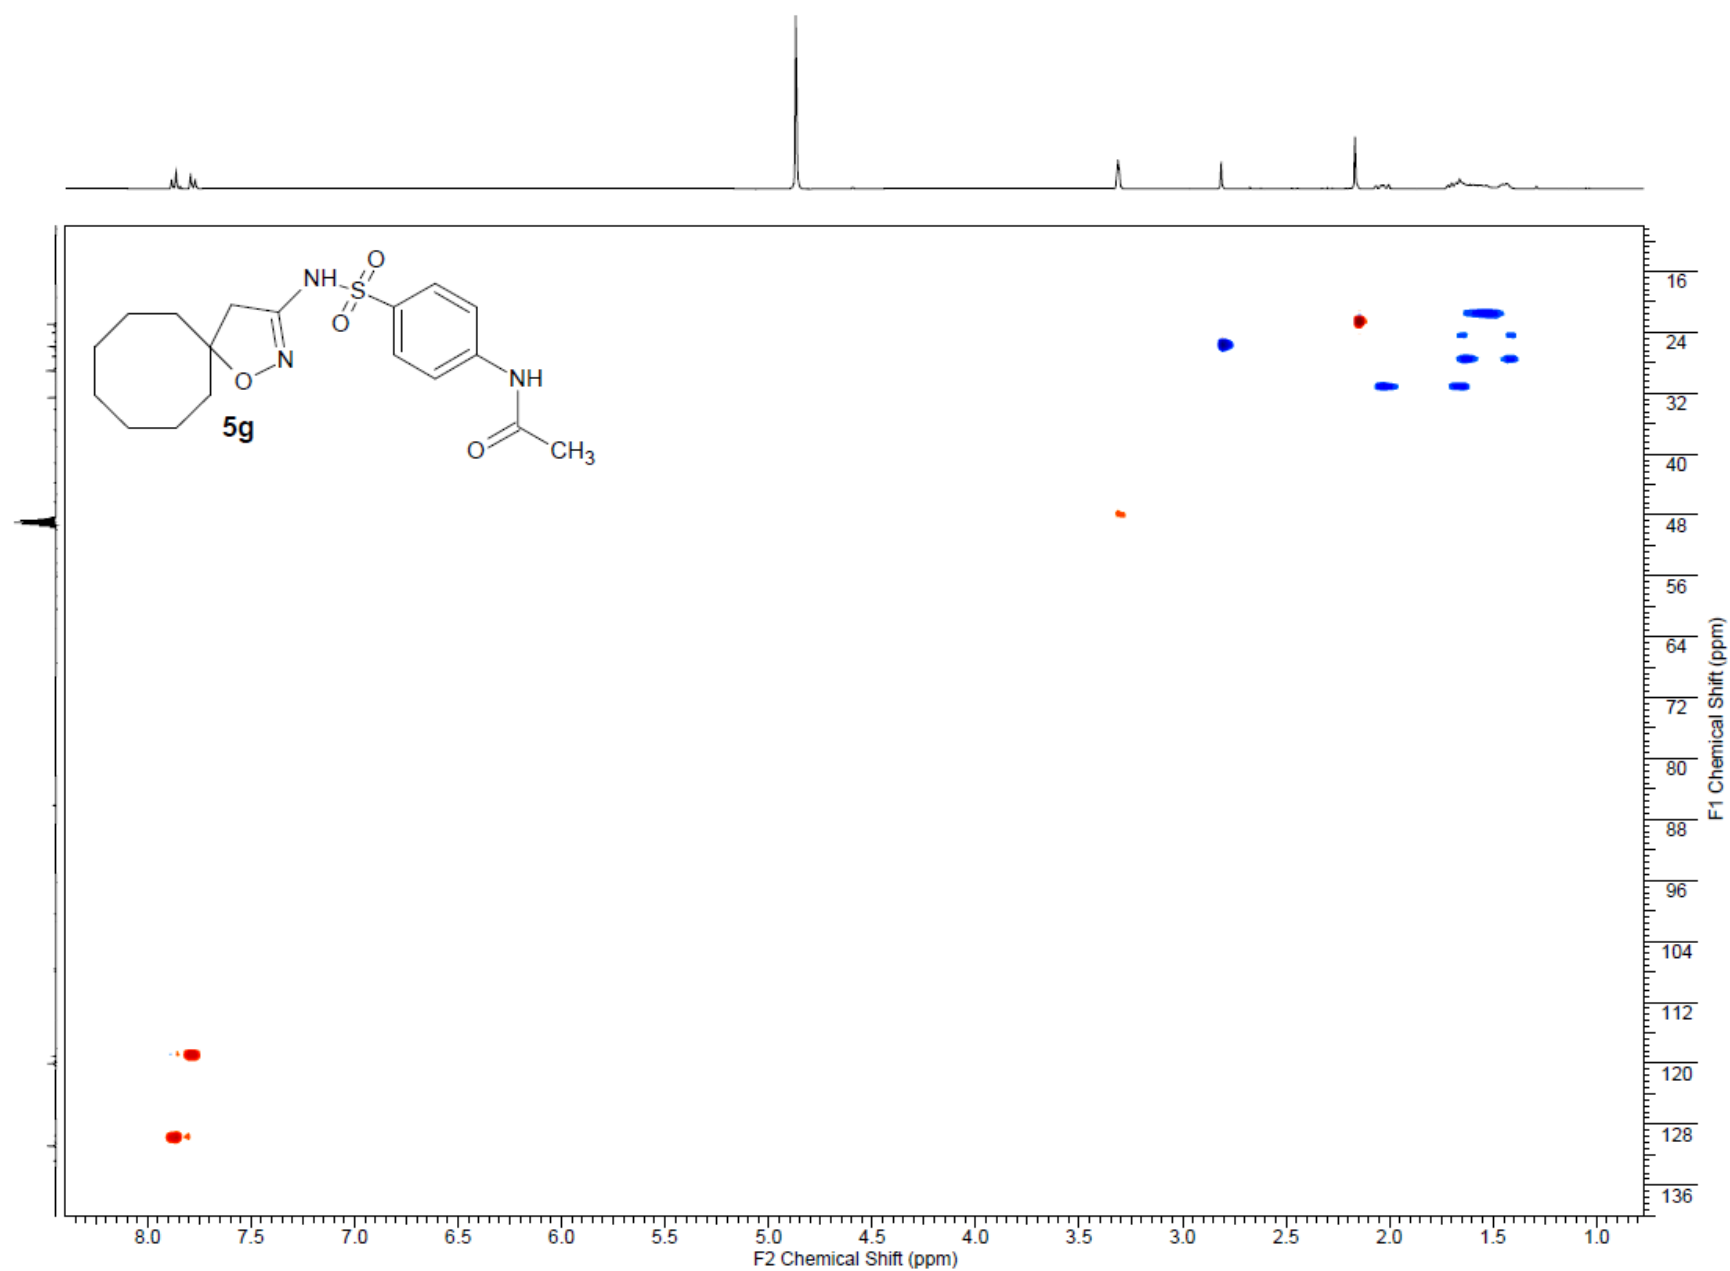

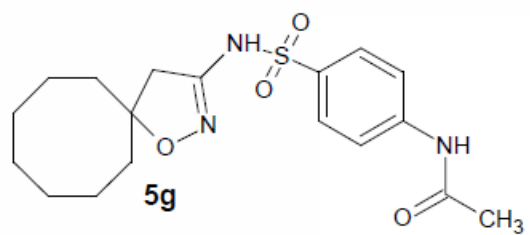

HMBC NMR ( $\text{CD}_3\text{OD}$ ) spectrum of compound **5g**

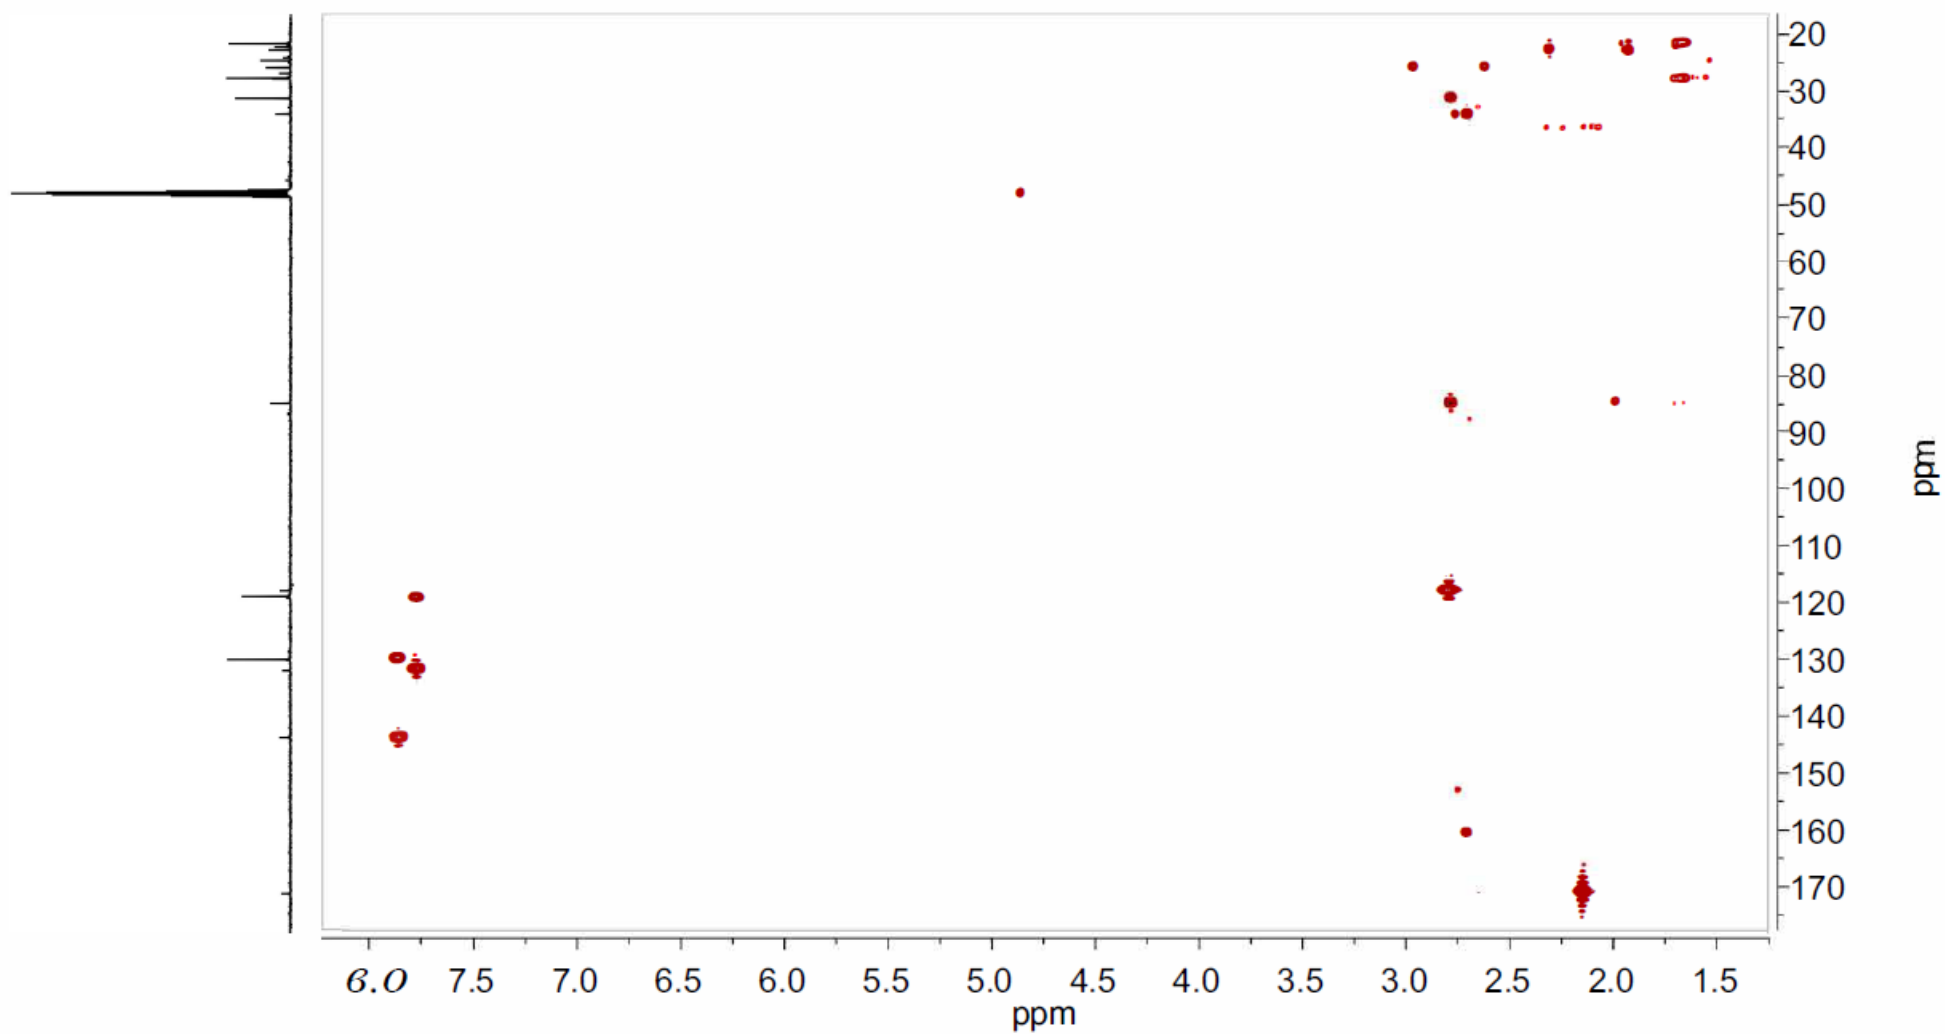

$^1\text{H}$  NMR ( $\text{CDCl}_3$ ) spectrum of compound **5h**

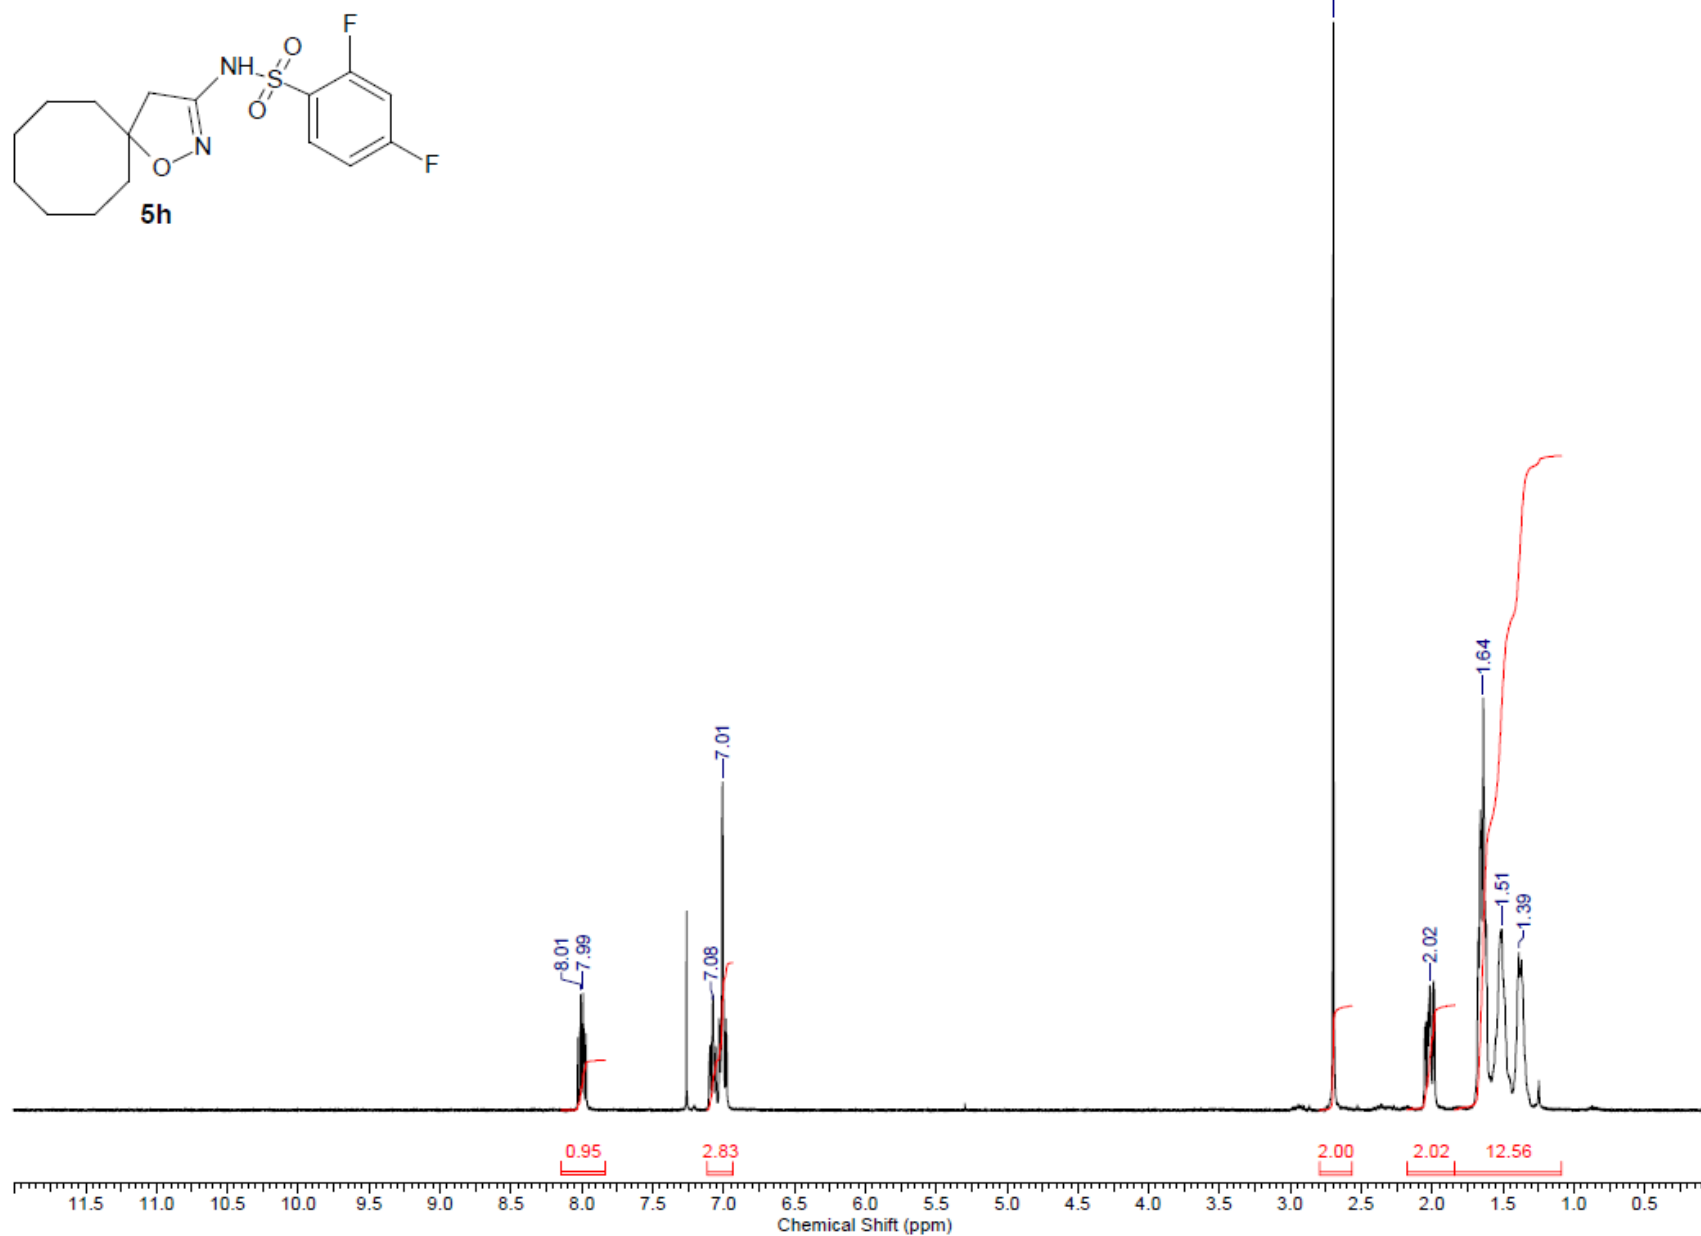

$^{13}\text{C}$  NMR ( $\text{CDCl}_3$ ) spectrum of compound **5h**

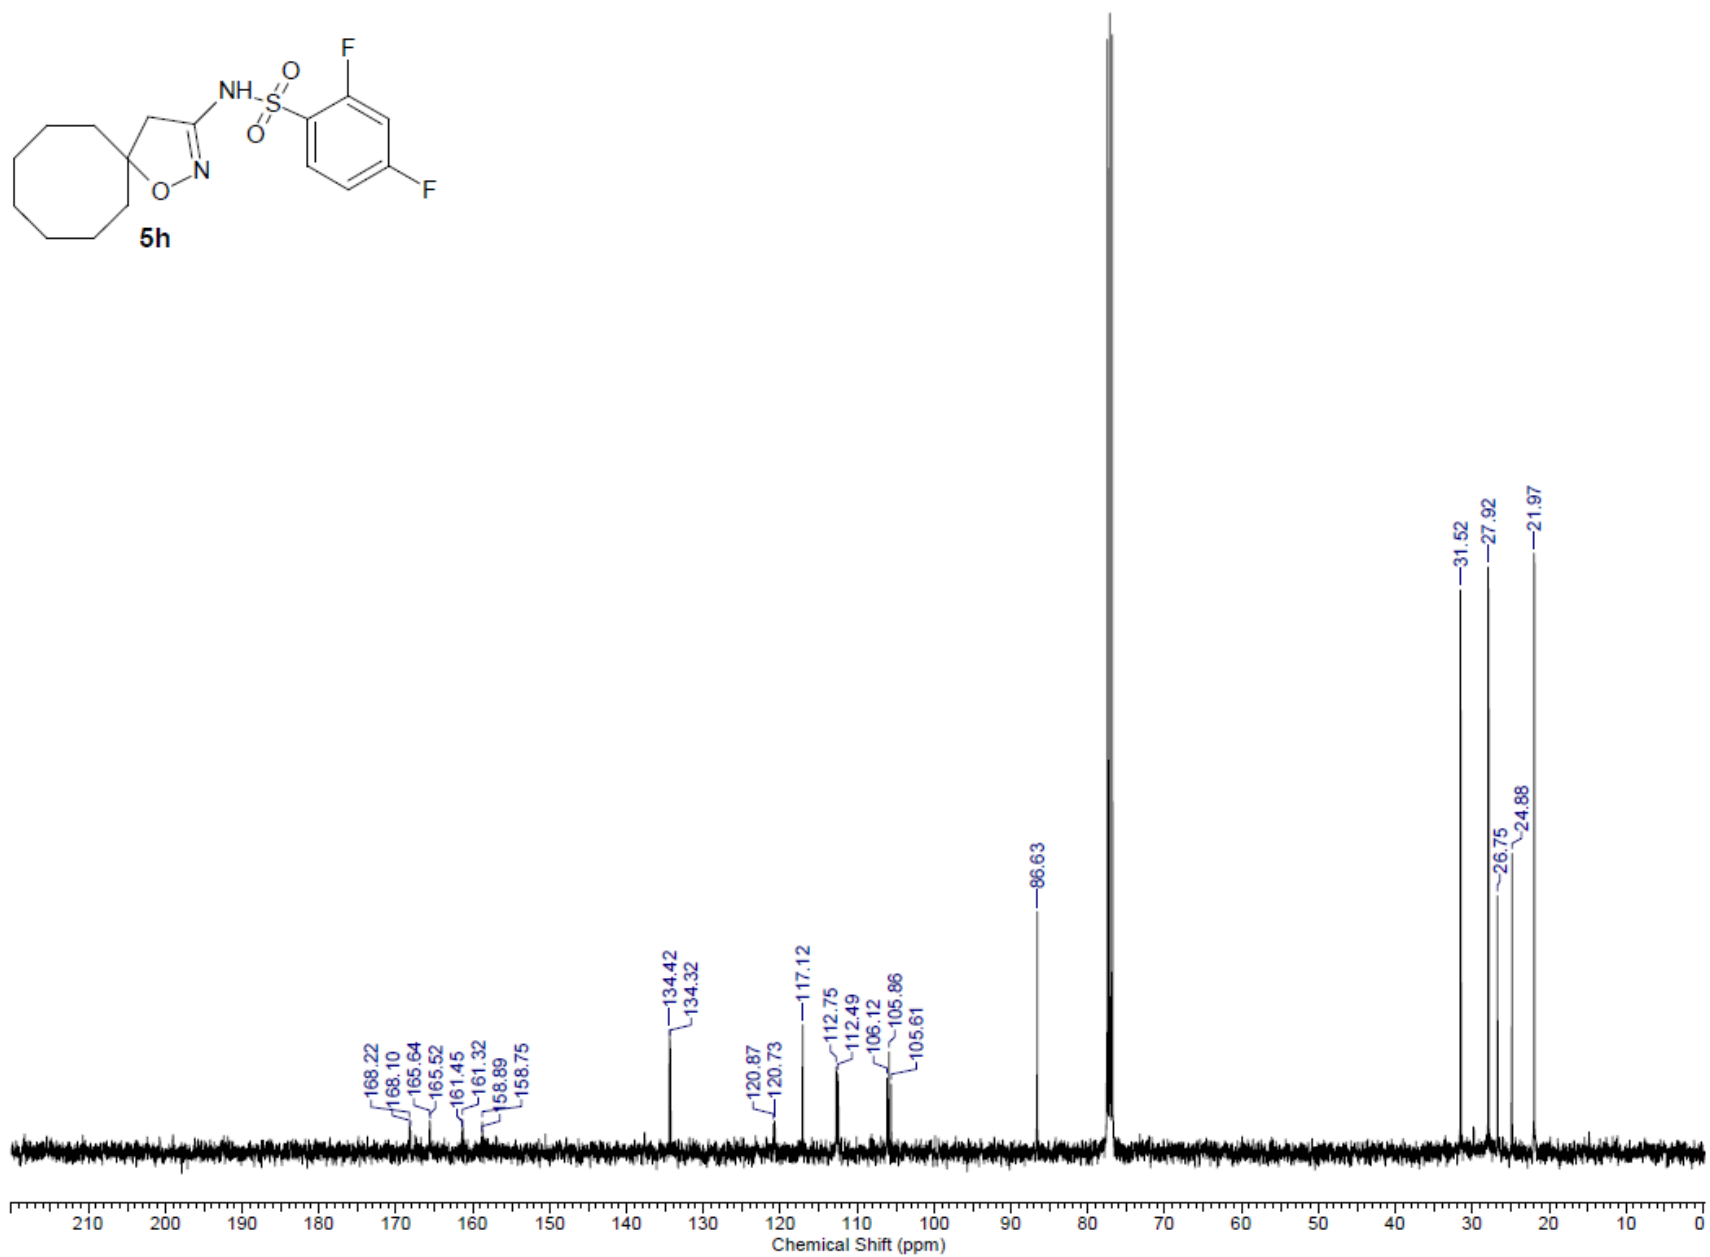

$^{19}\text{F}$  NMR ( $\text{CDCl}_3$ ) spectrum of compound 5h

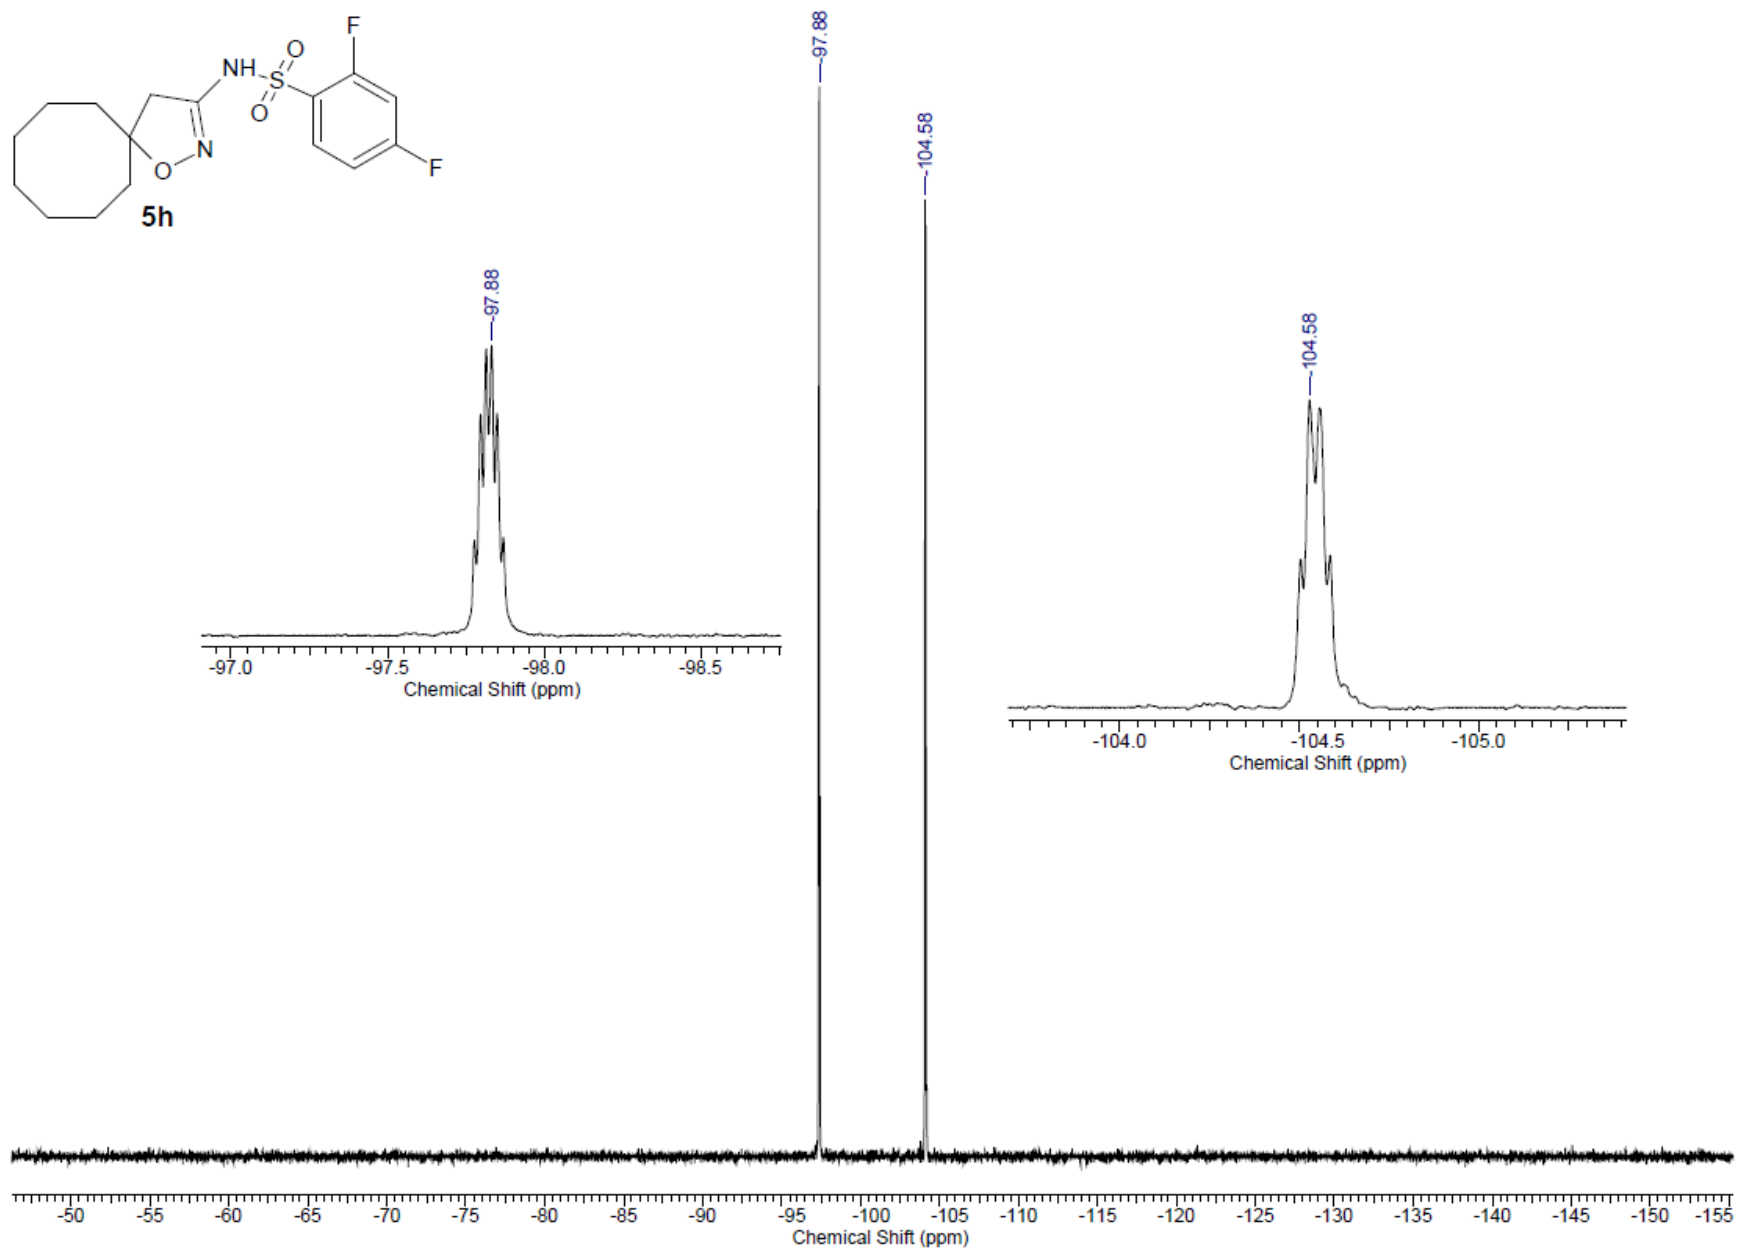

$^1\text{H}$  NMR ( $\text{CDCl}_3$ ) spectrum of compound **5i**

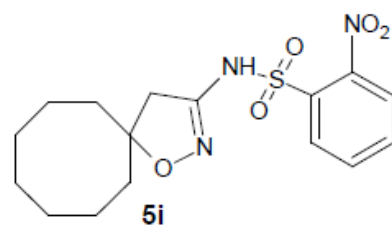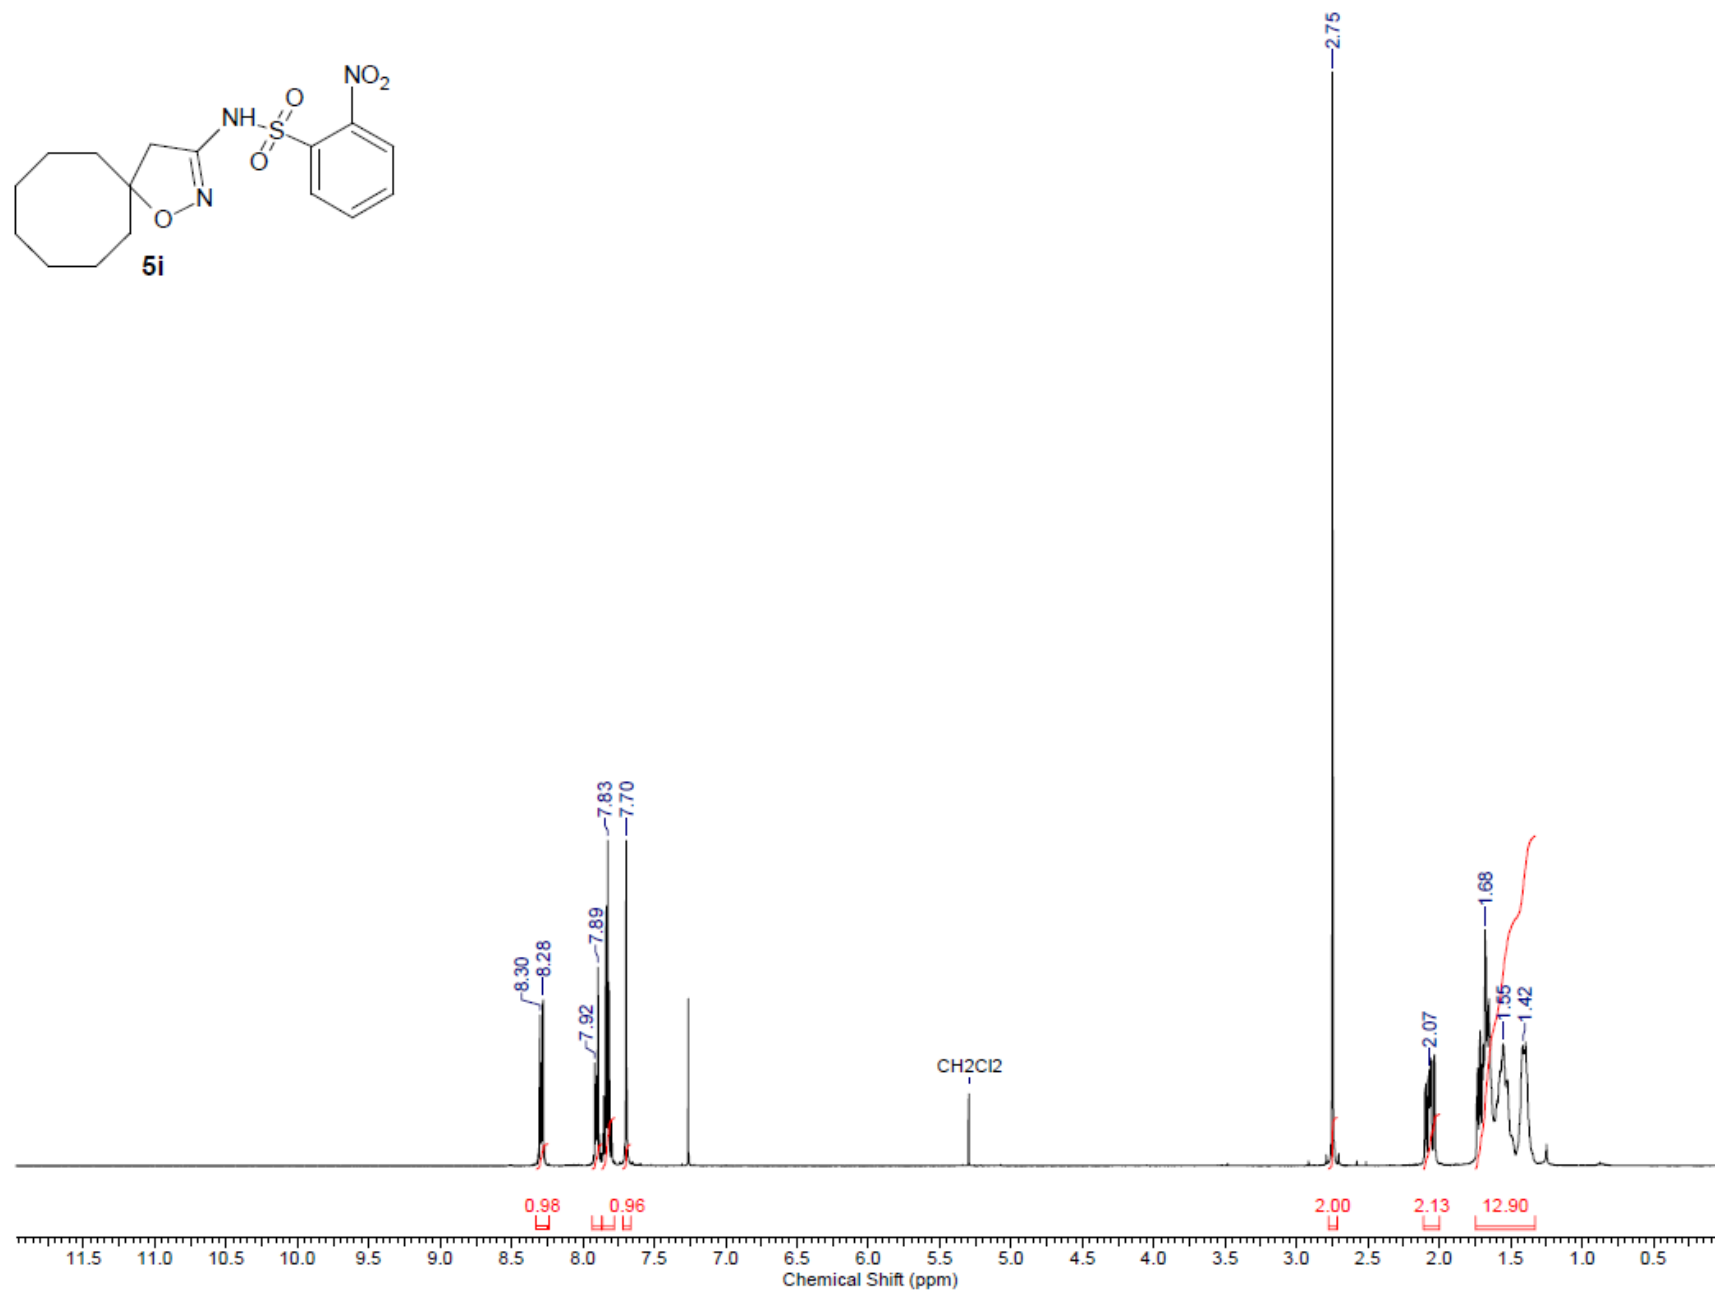



$^{13}\text{C}$  NMR ( $\text{CDCl}_3$ ) spectrum of compound **5i**

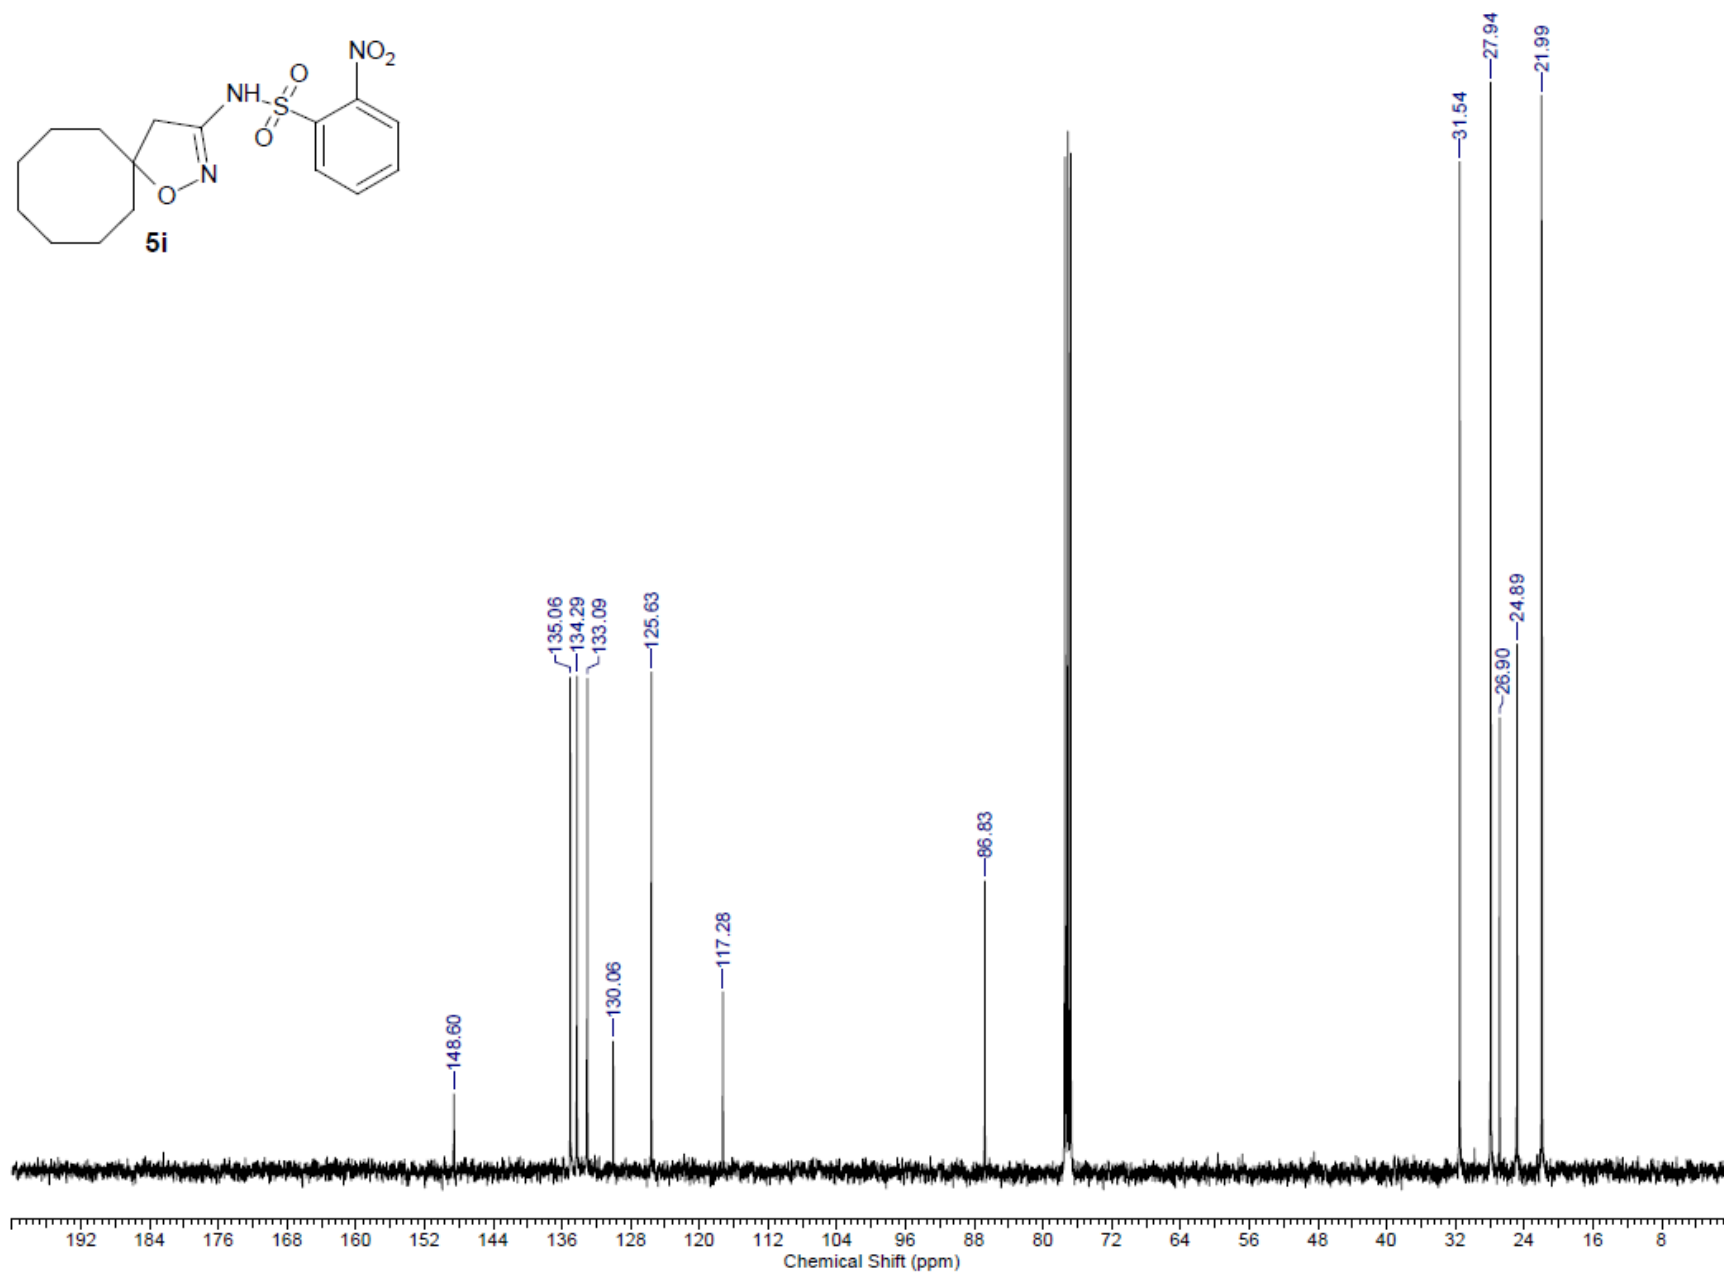

HSQC NMR (CDCl<sub>3</sub>) spectrum of compound 5i

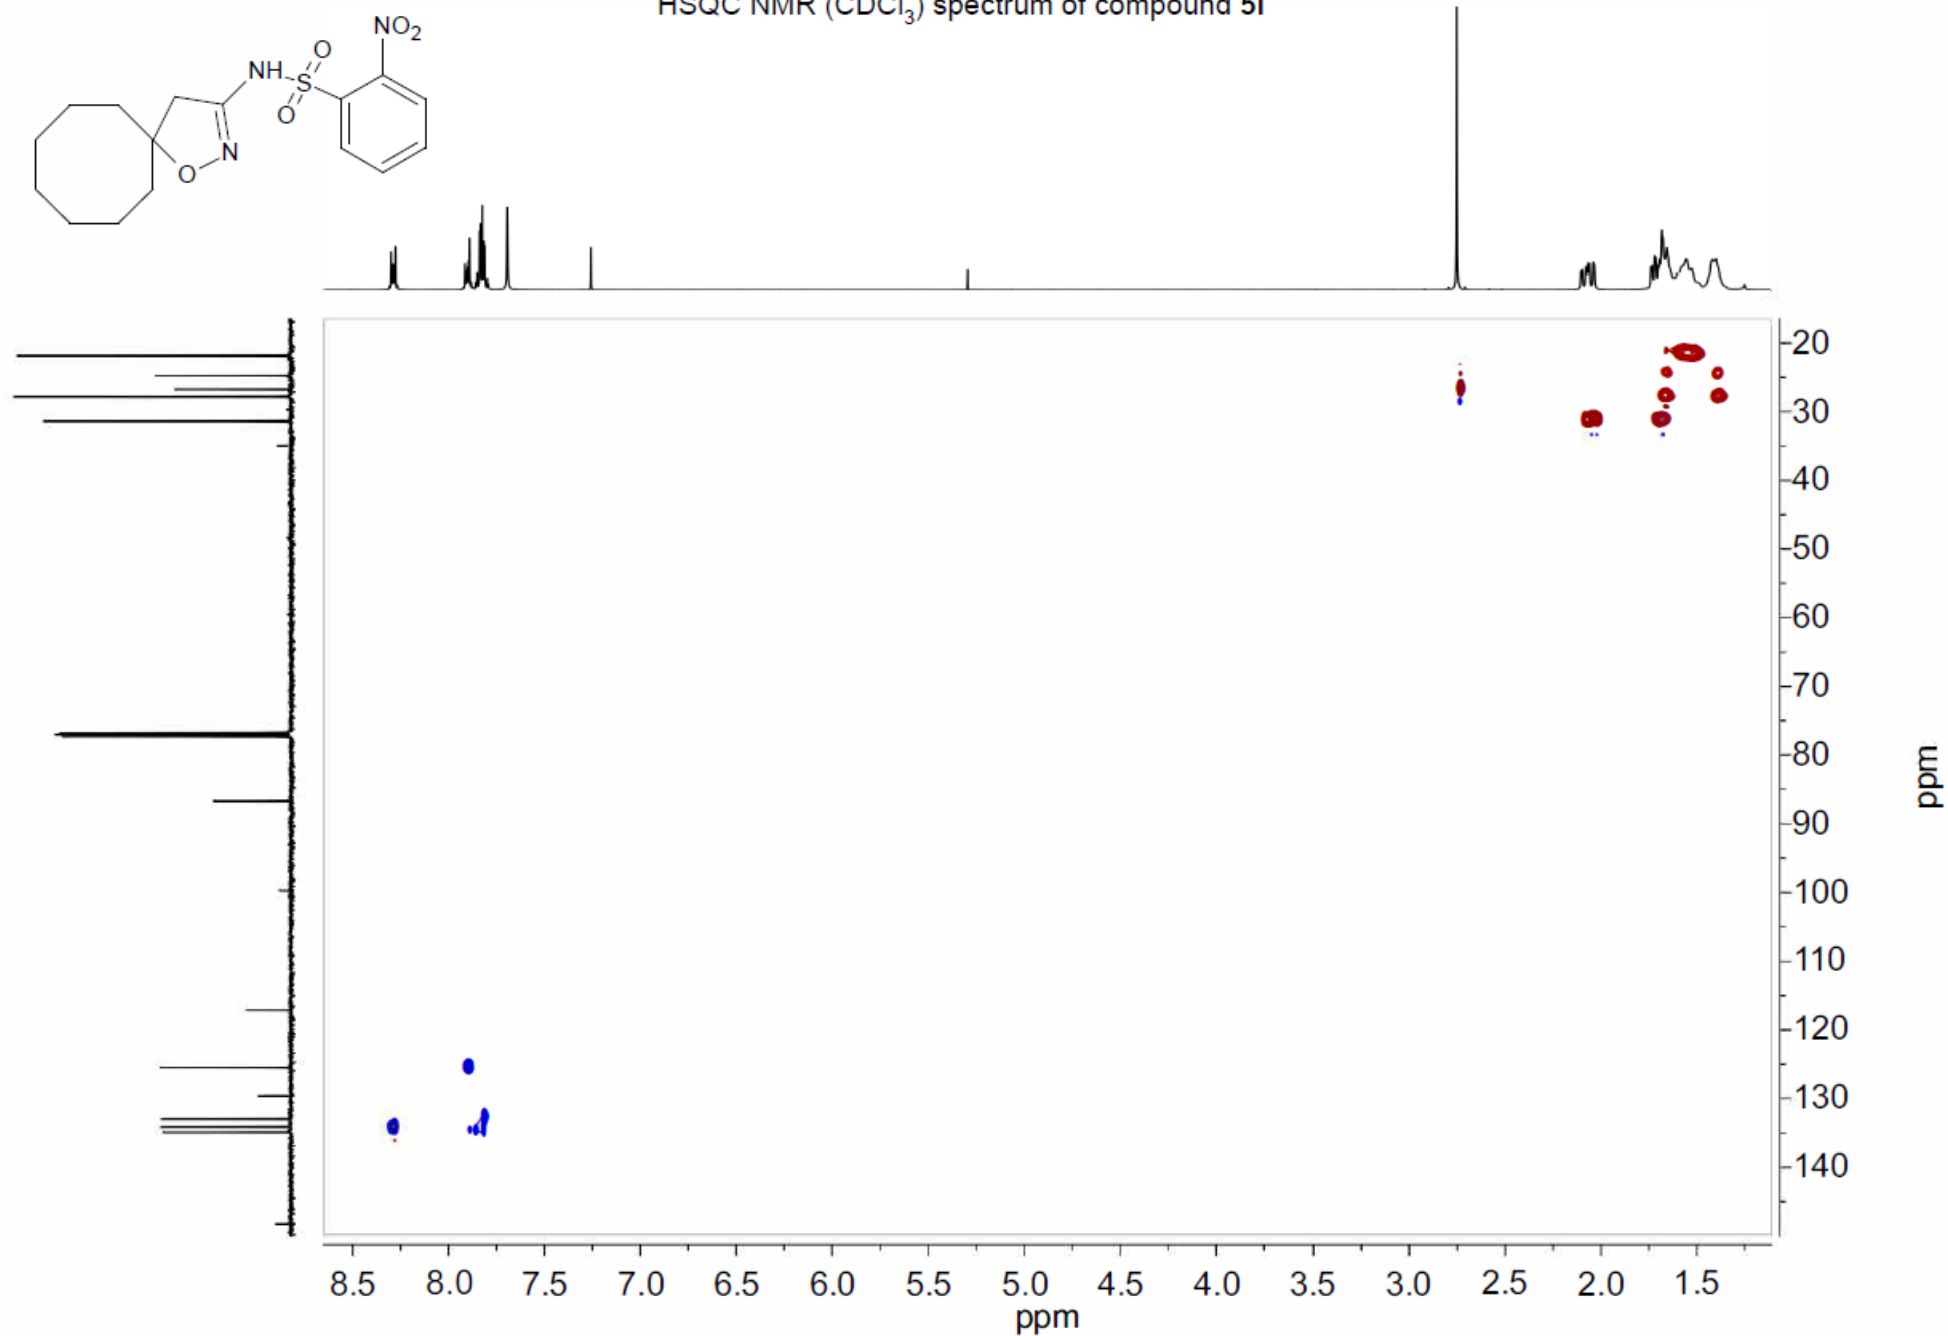

$^1\text{H}$  NMR ( $\text{CDCl}_3$ ) spectrum of compound **5j**

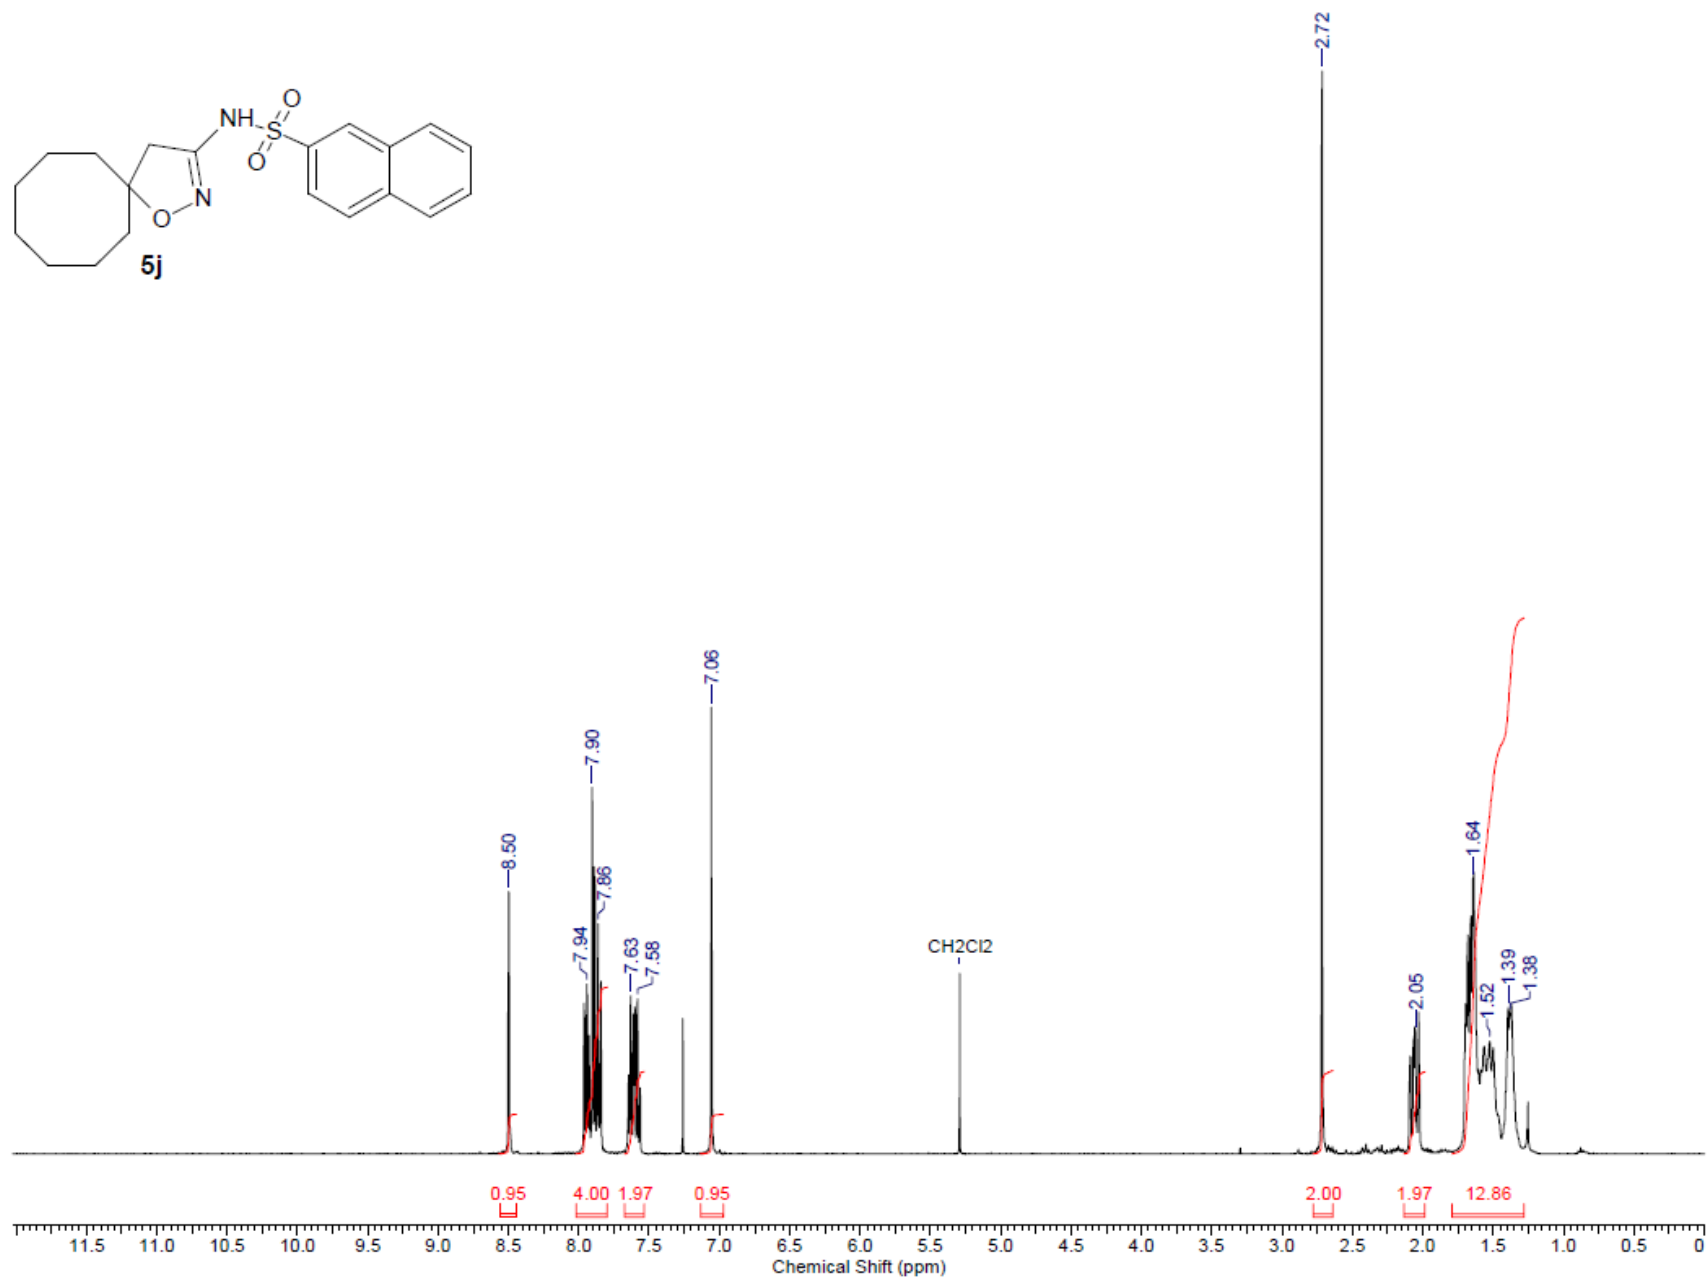

$^{13}\text{C}$  NMR ( $\text{CDCl}_3$ ) spectrum of compound **5j**

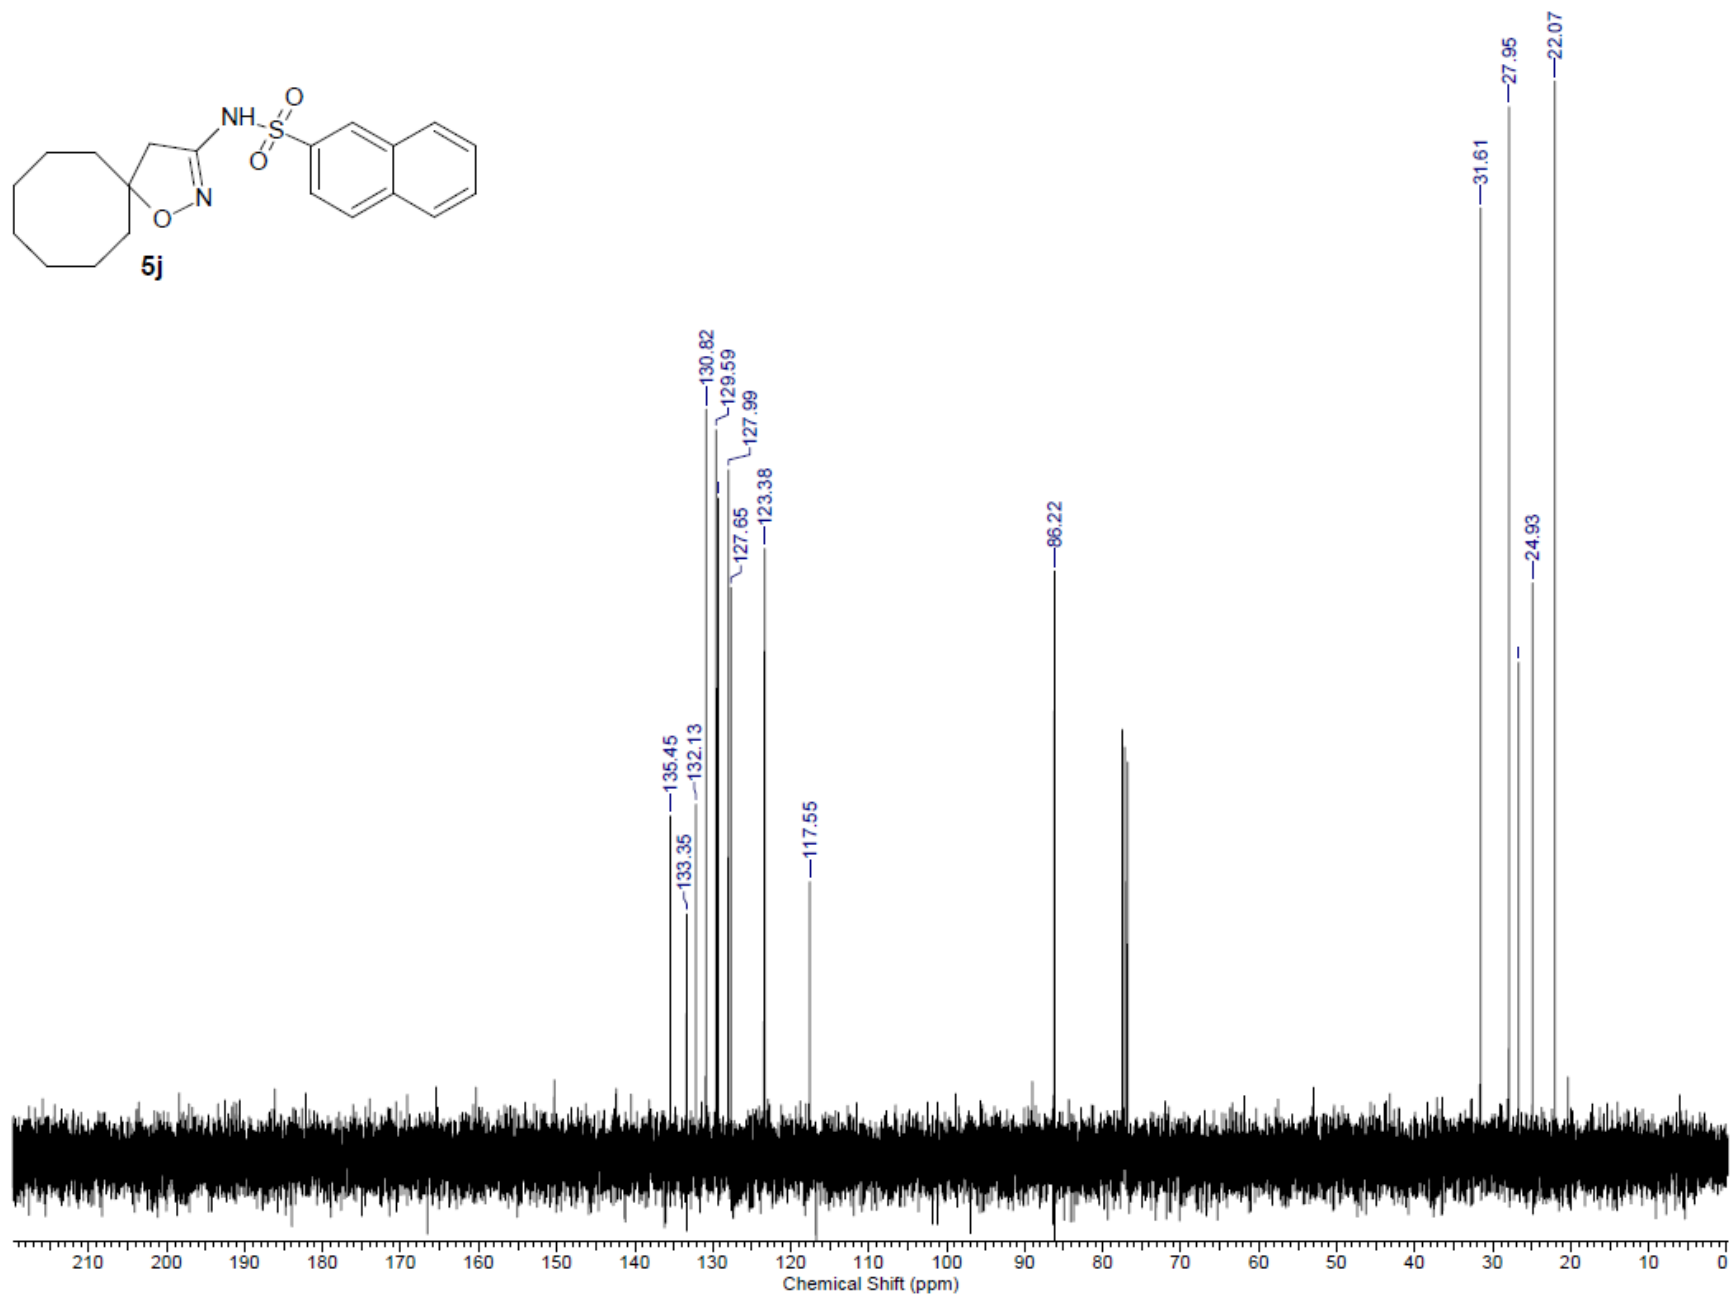

HSQC and HMBC NMR (CDCl<sub>3</sub>) spectra of compound 5j

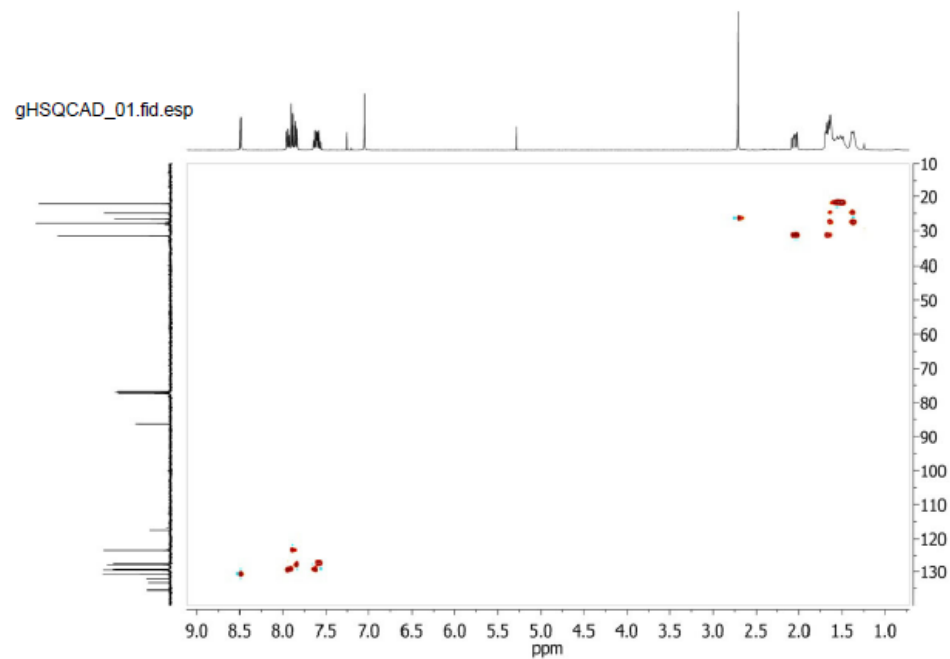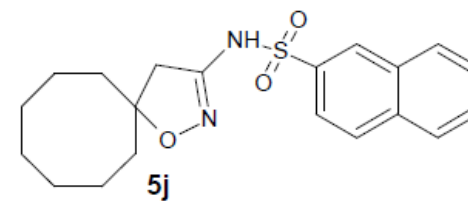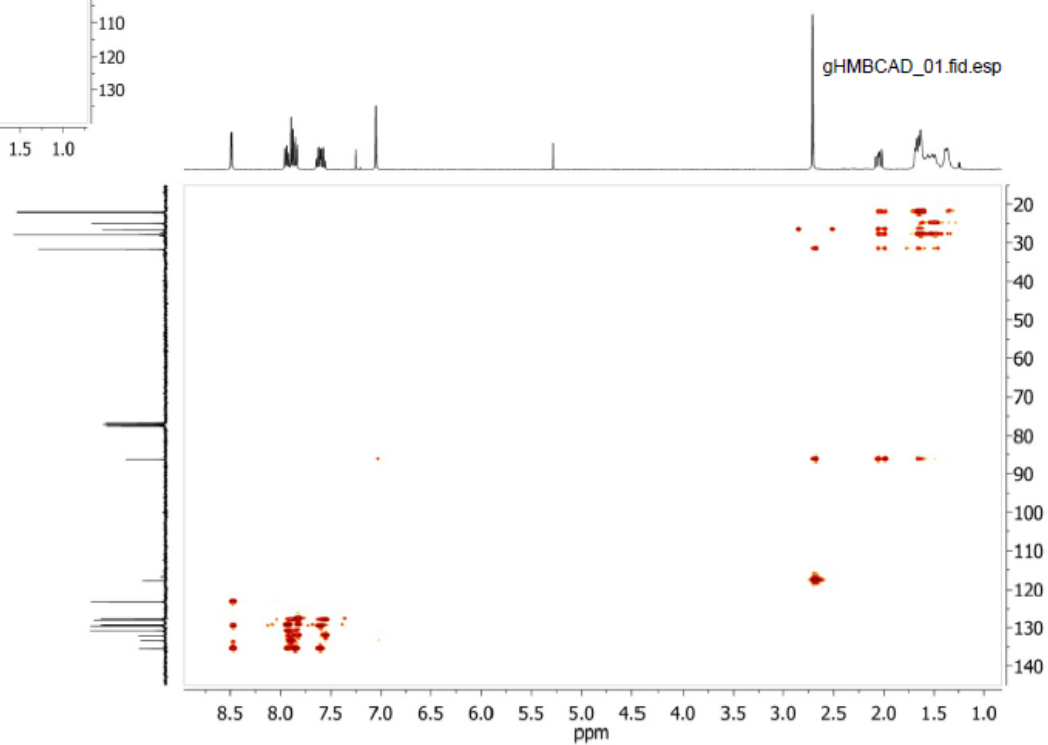

$^1\text{H}$  NMR ( $\text{CDCl}_3$ ) spectrum of compound **5k**

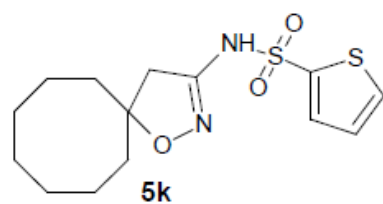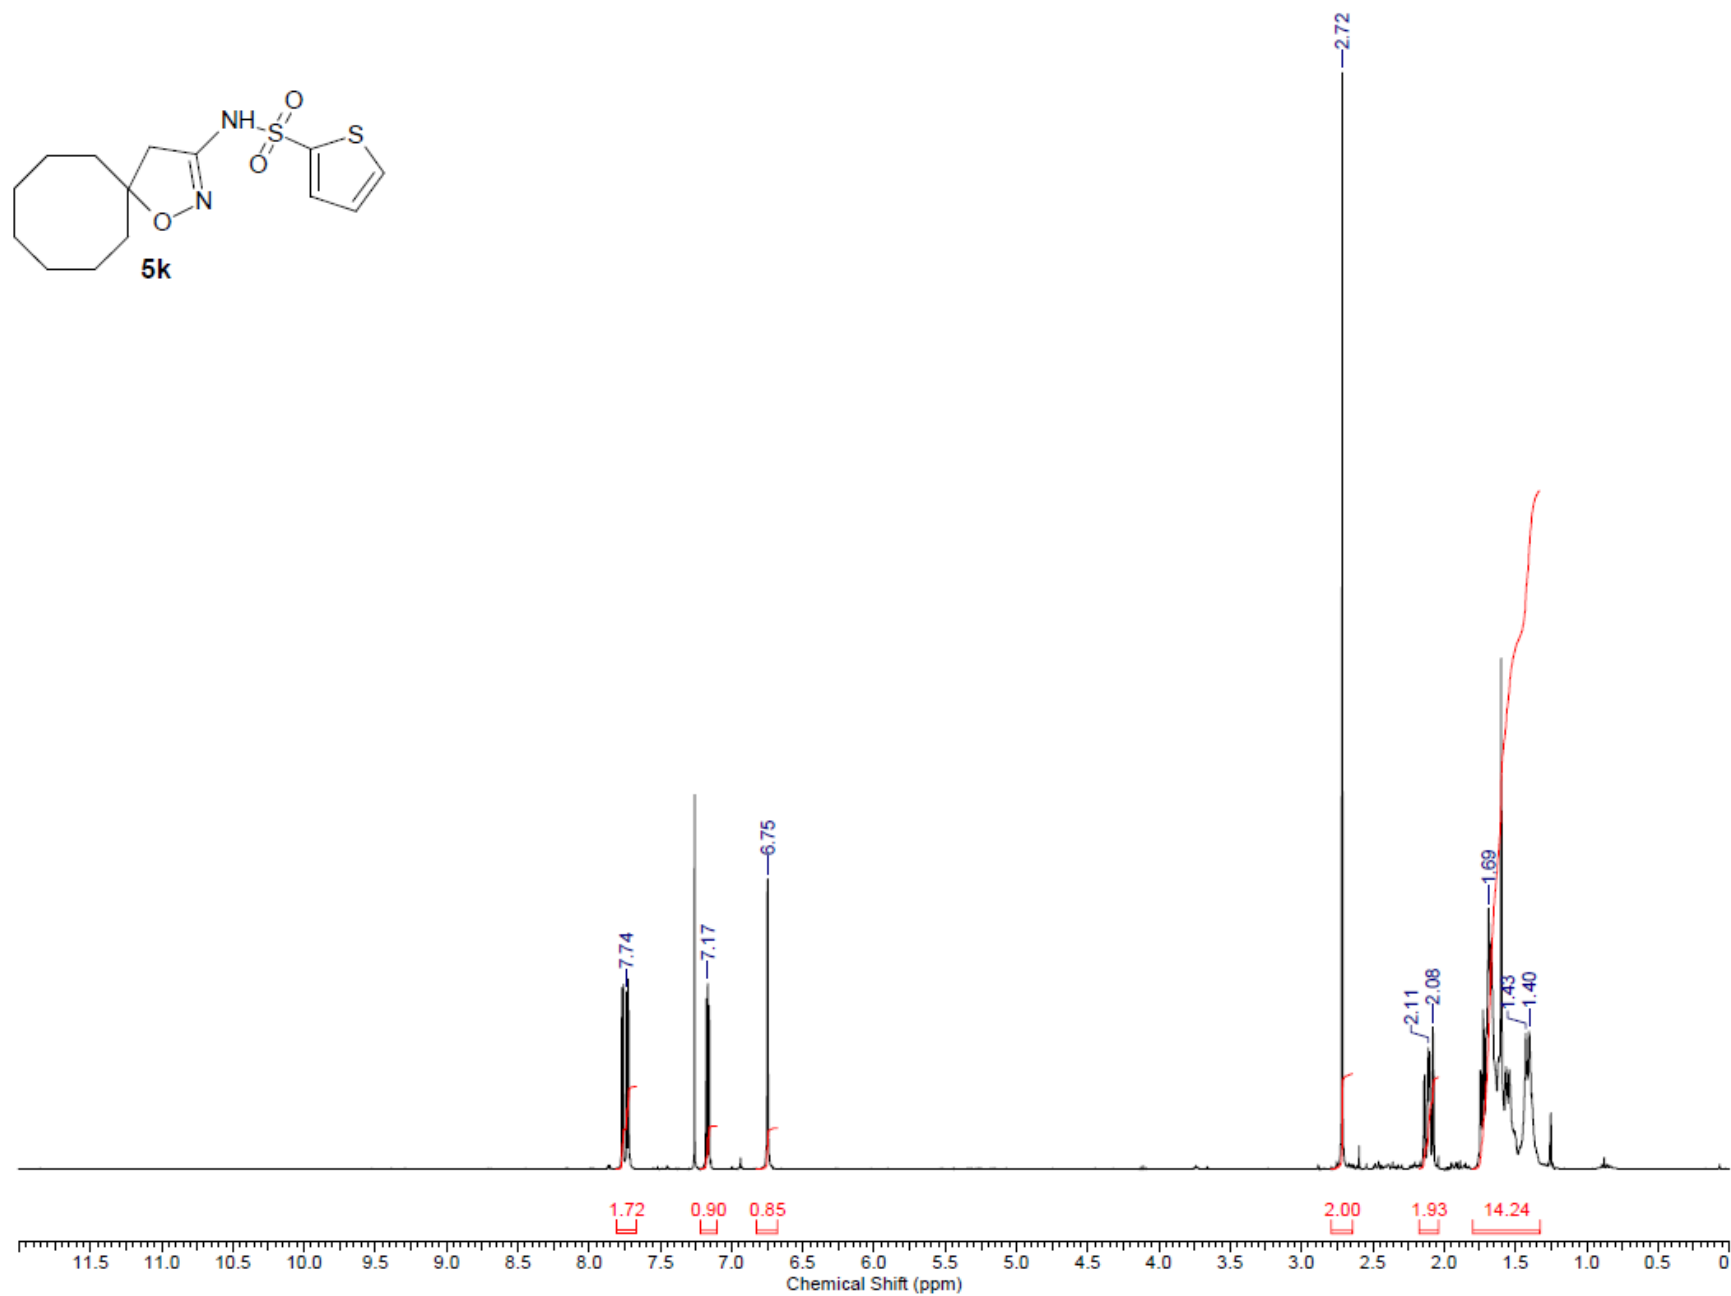

$^{13}\text{C}$  NMR ( $\text{CDCl}_3$ ) spectrum of compound **5k**

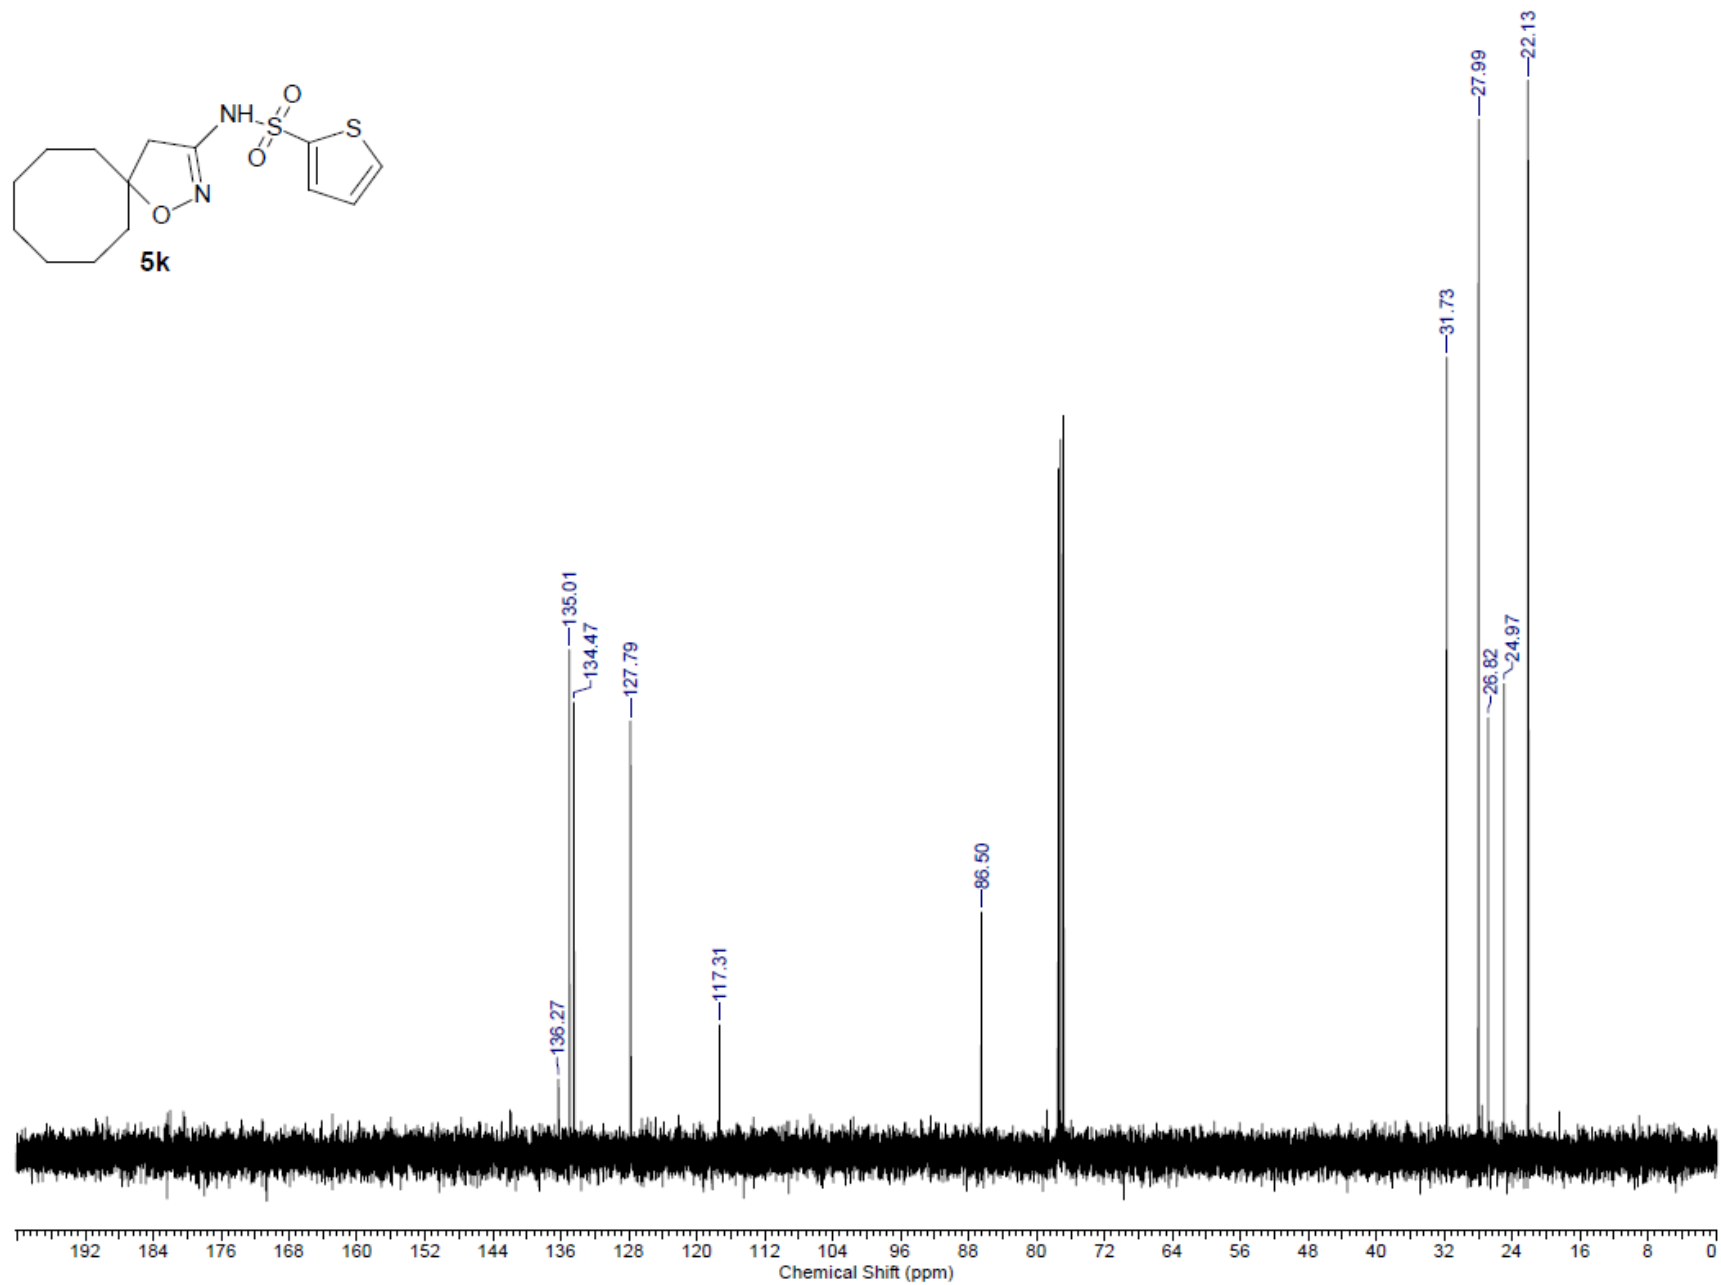

HSQC NMR (CDCl<sub>3</sub>) spectrum of compound 5k

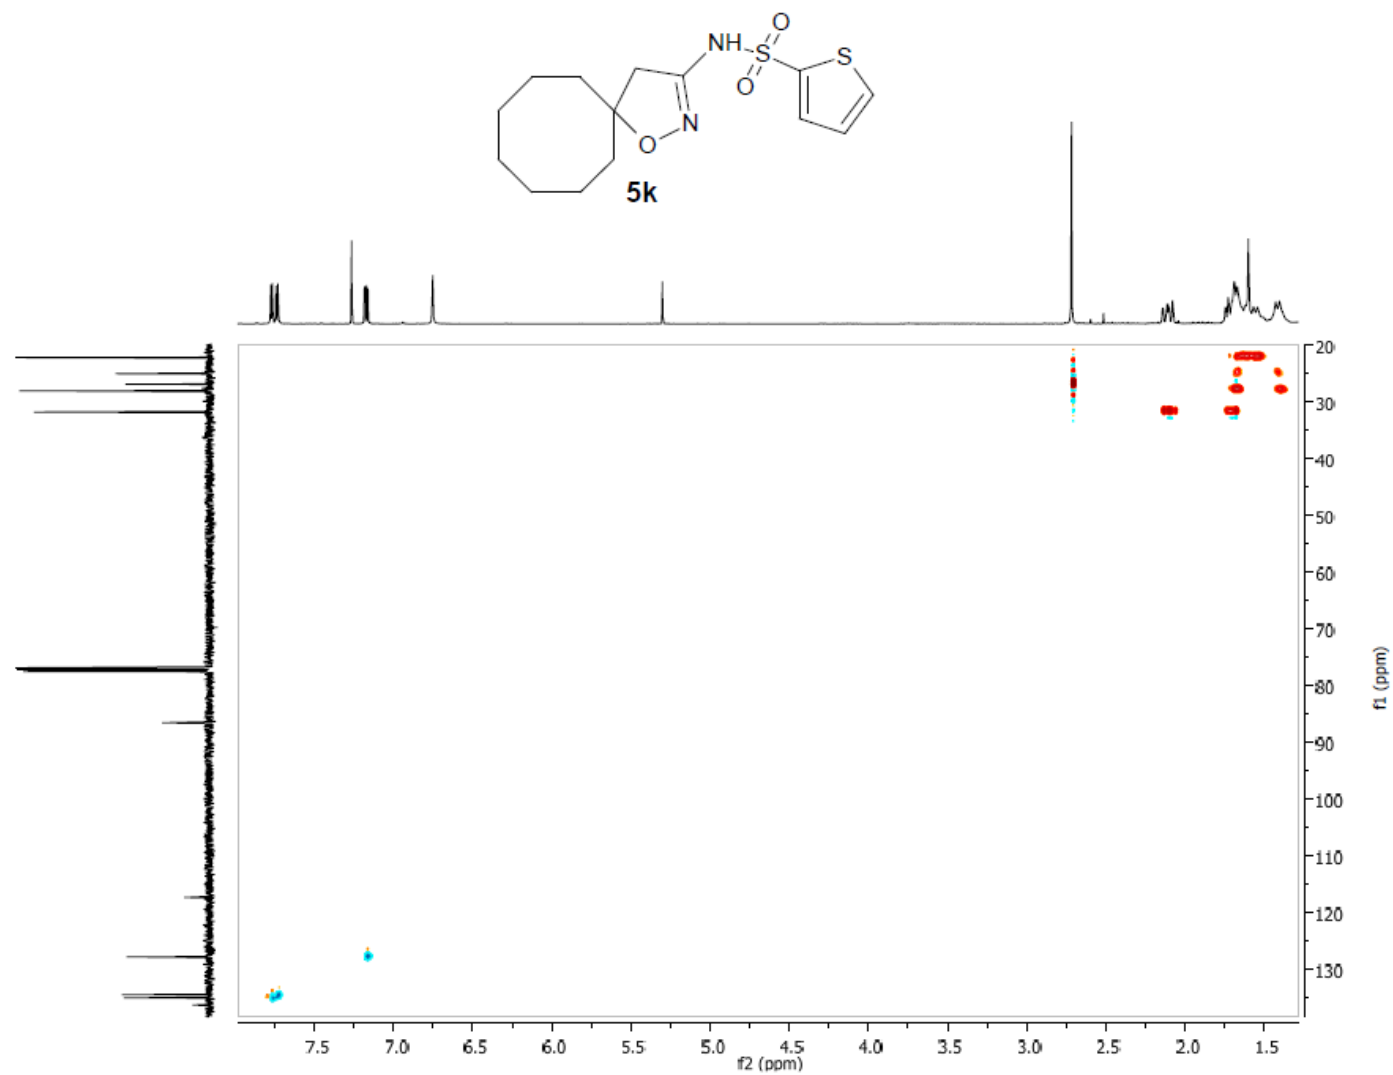



HMBC NMR (CDCl<sub>3</sub>) spectrum of compound 5k

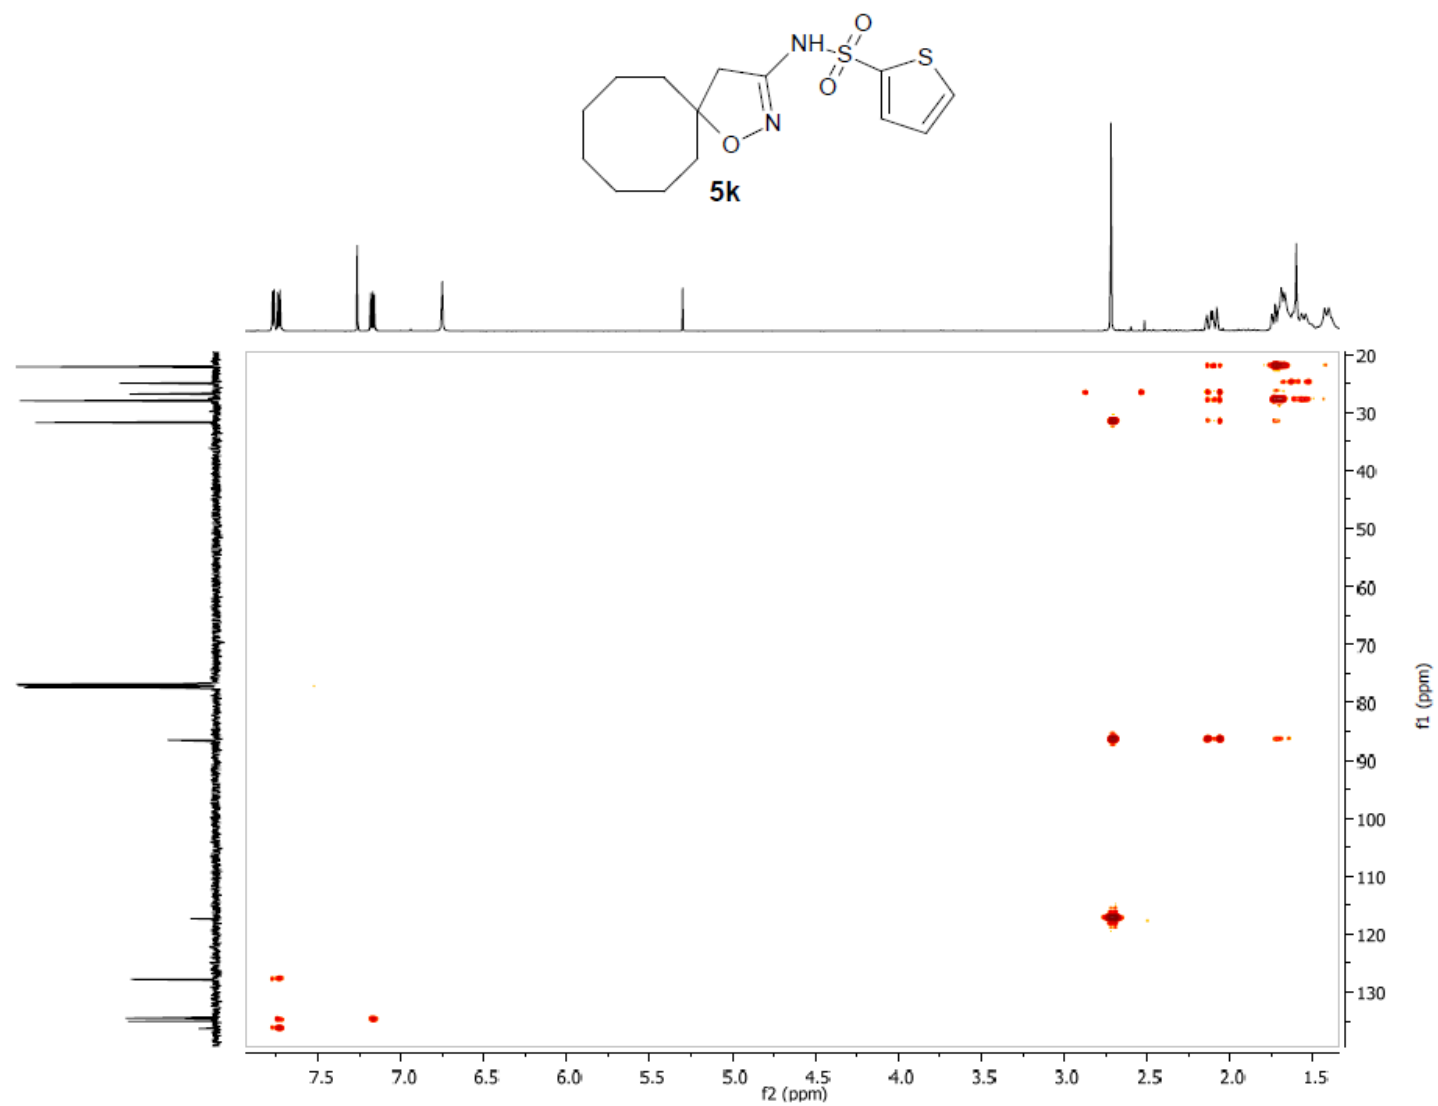

$^1\text{H}$  NMR ( $\text{CDCl}_3$ ) spectrum of compound **5l**

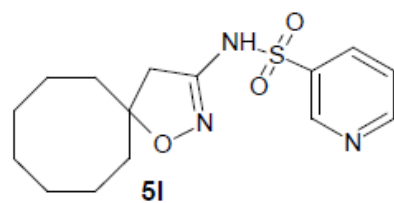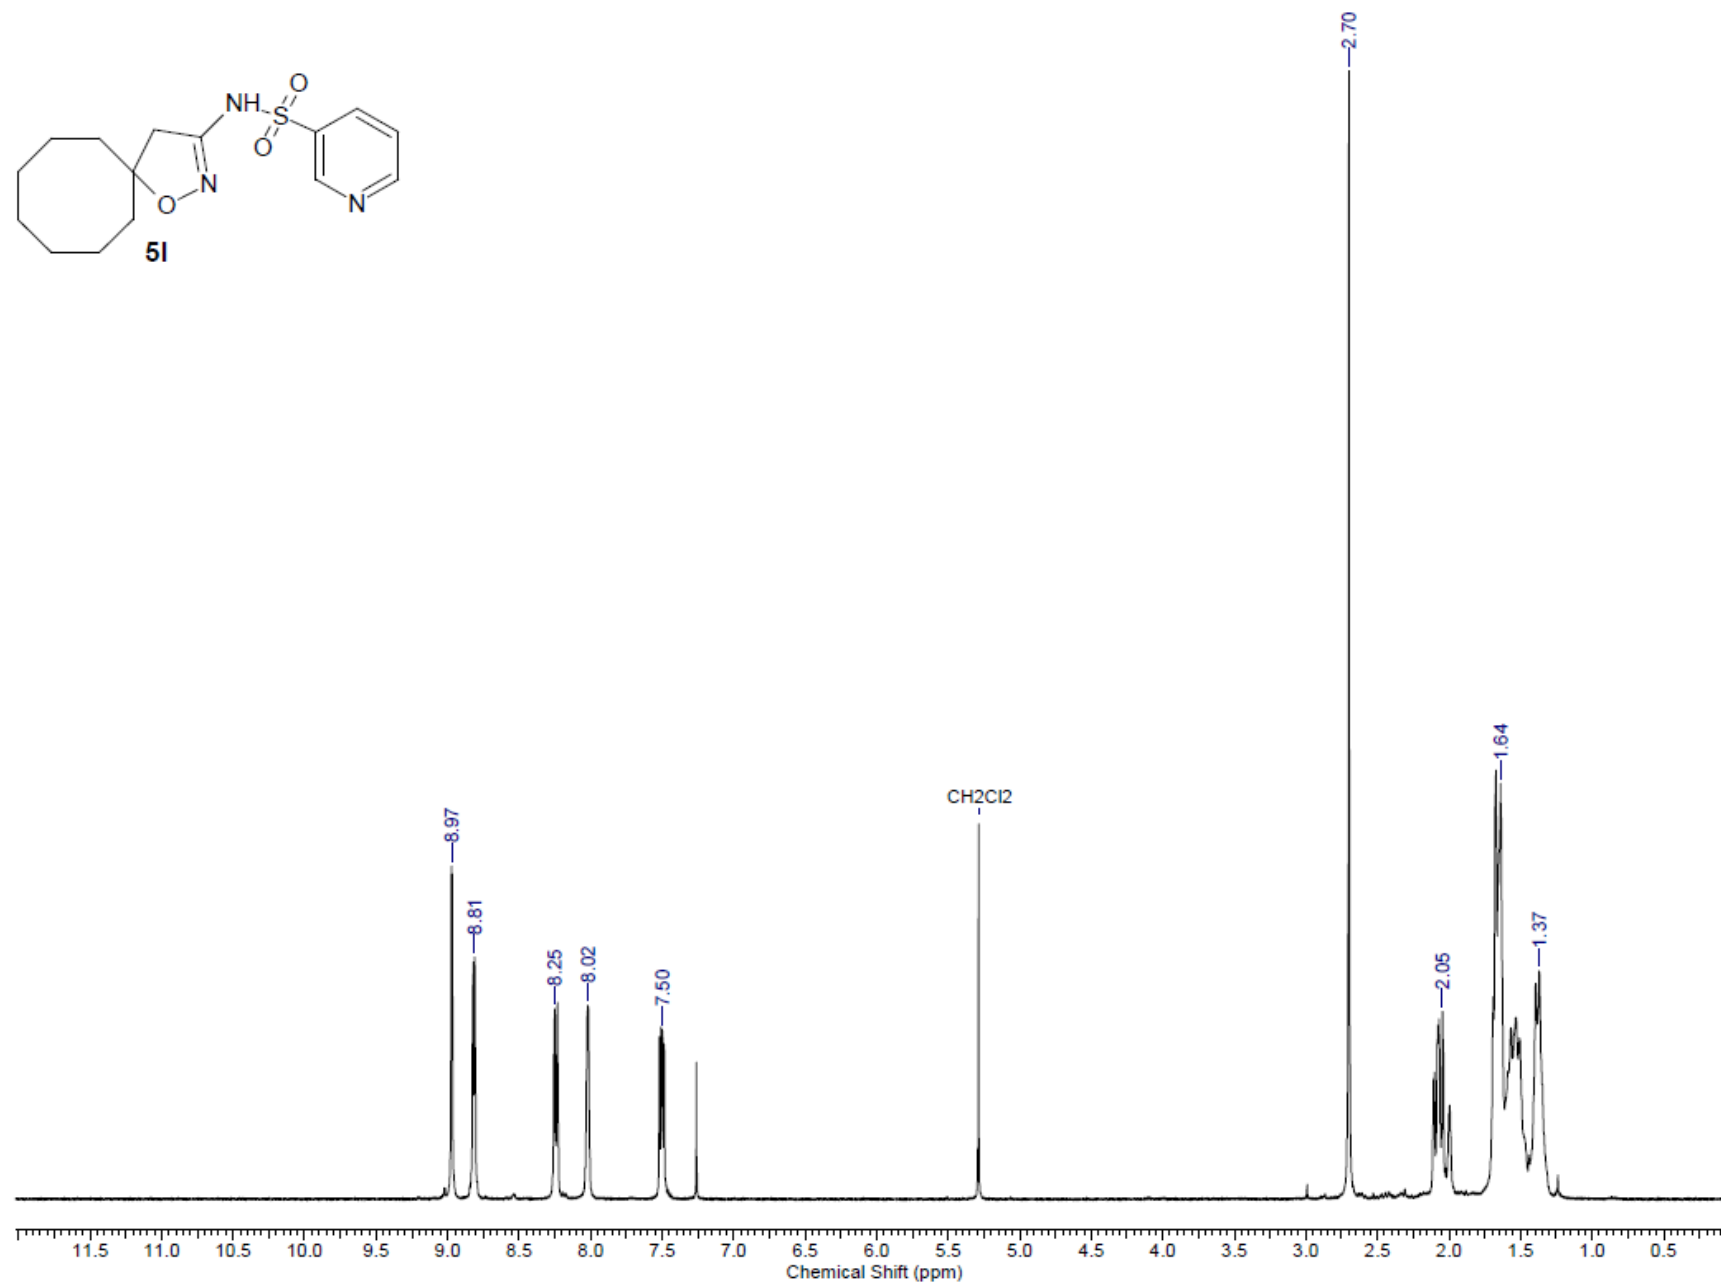

$^{13}\text{C}$  NMR ( $\text{CDCl}_3$ ) spectrum of compound **51**

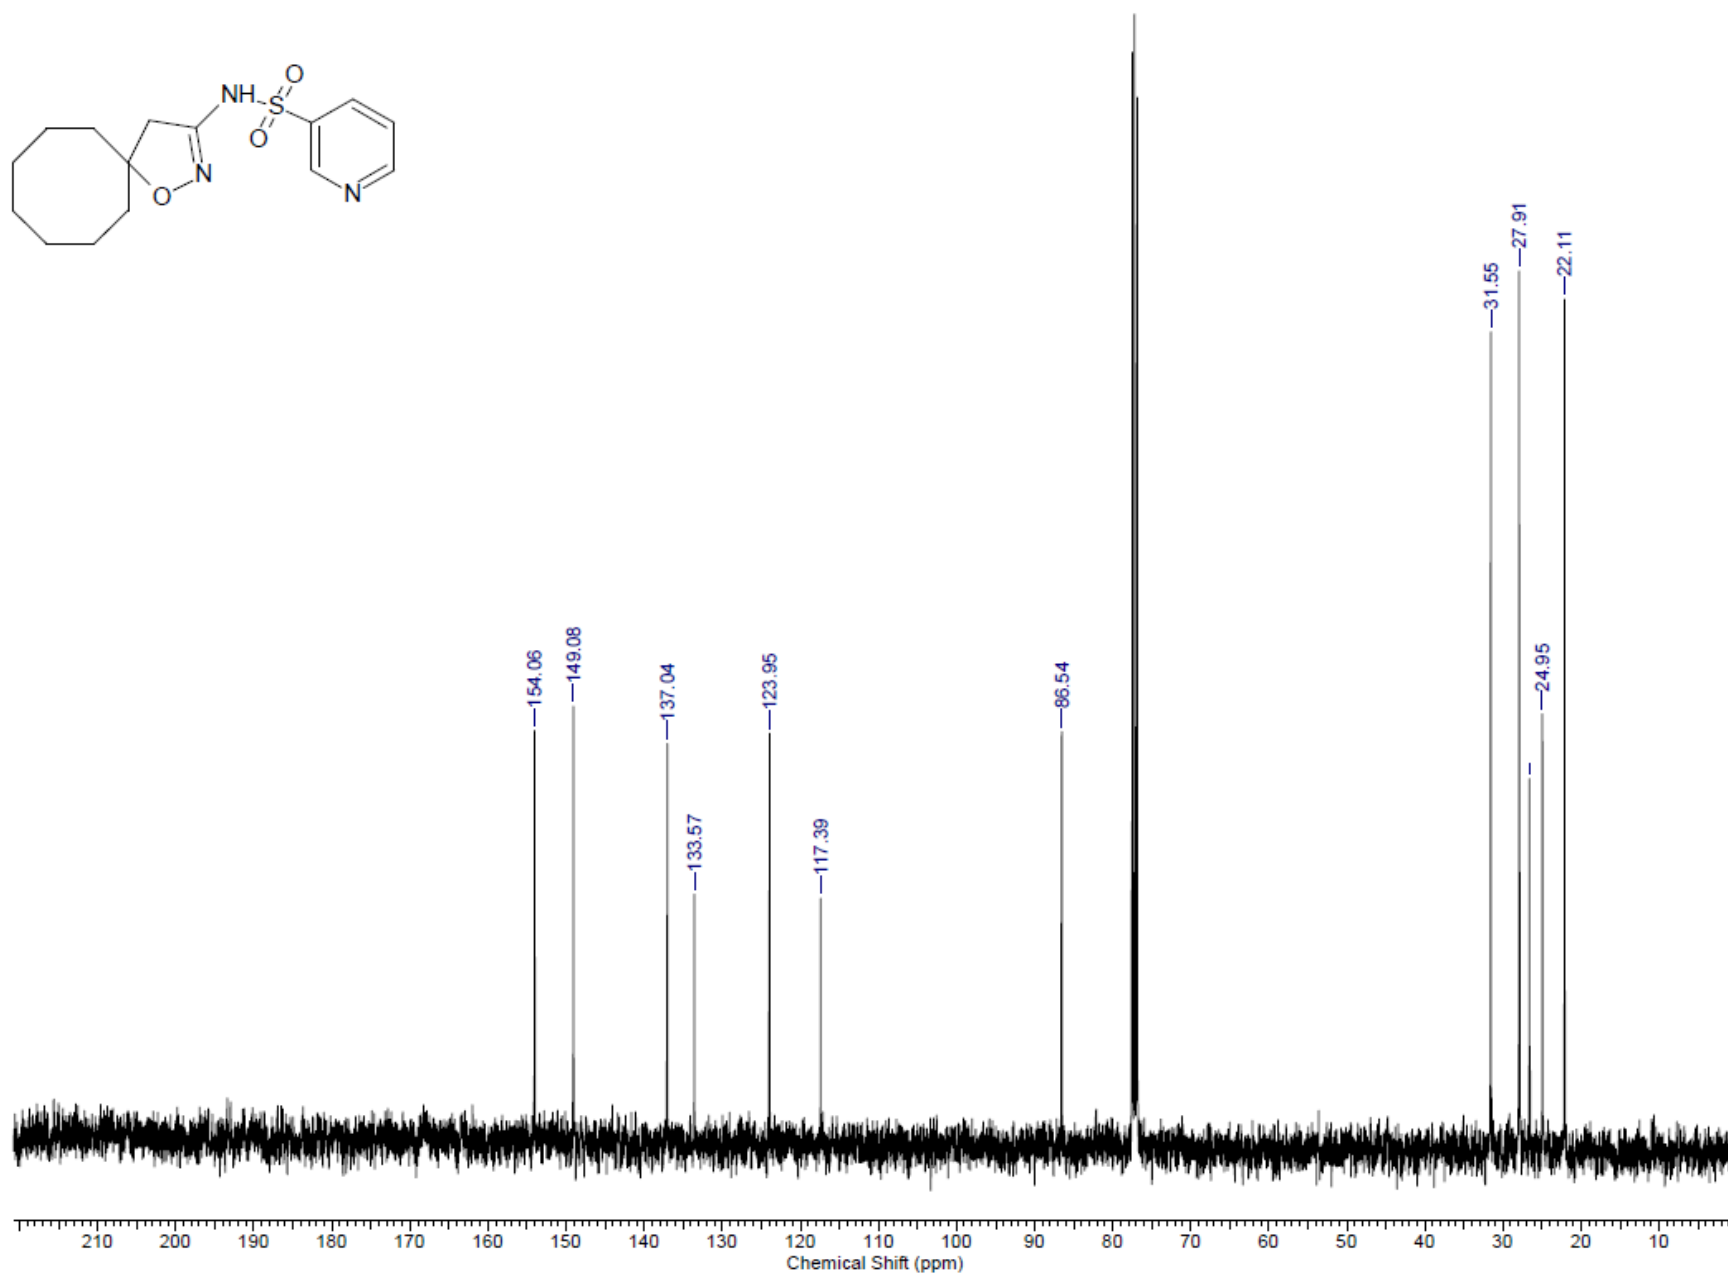

Supplement: s1 [file s1]
